# Supplementary material
Source: publisher figshare collection journal article supplement (https://acs.figshare.com/ndownloader/files/4392322)

## Supporting Information

### An Expedient Enantioselective Synthesis of the $\Delta^4$ -Oxocene Cores of (+)-Laurencin and (+)-Prelaureatin

Jim Li\*, Judy M. Suh and Elbert Chin

*Department of Medicinal Chemistry, Roche Palo Alto LLC, 3431 Hillview Avenue,  
Palo Alto, CA 94034*

*jim.li@roche.com*

#### Table of Contents

|                                   |     |
|-----------------------------------|-----|
| 1. General methods and materials  | S1  |
| 2. Synthesis and characterization | S2  |
| 3. Spectra                        | S10 |

**1. General materials and methods.** Infrared (IR) spectra were obtained using Thermo-Nicolet 6700 infrared spectrometer. Proton and carbon nuclear magnetic resonance ( $^1\text{H}$  and  $^{13}\text{C}$  NMR) spectra were recorded on the following instruments: Bruker model Avance-III ( $^1\text{H}$  at 500 MHz,  $^{13}\text{C}$  at 125 MHz), Bruker model Avance ( $^1\text{H}$  at 400 MHz,  $^{13}\text{C}$  at 100 MHz), and Bruker model Avance-III ( $^1\text{H}$  at 300 MHz,  $^{13}\text{C}$  at 75 MHz). Optical rotations were determined using a Perkin-Elmer 341 polarimeter. High resolution mass spectroscopic data were obtained in ESI mode using Thermo LTQ Orbitrap. All chemicals and solvents were purchased from commercial sources and used directly without further treatment.

## 2. Synthesis and characterization

### (*R*)-1-Benzyloxy-7-[(*tert*-butyldiphenylsilyl)oxy]-hept-4-yn-2-ol (**10a**)

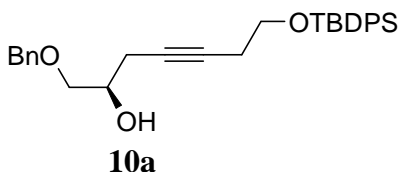

To a solution of propargyl alkyne **9** (18.79 g, 60.90 mmol) in THF (200 mL) at  $-78\text{ }^{\circ}\text{C}$  was added a solution of *n*-BuLi (1.6 M in THF, 16.95 mL, 60.90 mmol) dropwise. The mixture was stirred at  $-78\text{ }^{\circ}\text{C}$  for 15 min and followed by addition of  $\text{BF}_3\cdot\text{OEt}_2$  (7.49 mL, 60.90 mmol). The resulting mixture was stirred for 10 min and followed by addition of a solution of (-)-(*R*)-benzyl glycosidic ether **8** (5.00 g, 30.45 mmol). The reaction mixture was stirred further at  $-78\text{ }^{\circ}\text{C}$  for 1 h before it was quenched with saturated aq.  $\text{NH}_4\text{Cl}$  solution. The reaction mixture was allowed to warm to room temperature and diluted with ether. The organic layer was separated, washed with  $\text{H}_2\text{O}$ , brine, dried over  $\text{MgSO}_4$ , and concentrated. The crude residue was purified by flash column chromatography on silica gel (10 – 20% EtOAc in hexanes) to afford the product **10a** (12.09 g, 84% yield) as a colorless oil:

$[\alpha]_D^{25} = -7.0$  (*c* 7.02,  $\text{CHCl}_3$ );  $^1\text{H}$  NMR (400 MHz,  $\text{CDCl}_3$ )  $\delta$  7.69 – 7.65 (m, 4 H), 7.45 – 7.25 (m, 11 H), 4.52 (s, 2 H), 3.92 – 3.85 (m, 1 H), 3.73 (t,  $J = 7\text{ Hz}$ , 2 H), 3.57 (dd,  $J = 4, 9\text{ Hz}$ , 1 H), 3.46 (dd,  $J = 4, 9\text{ Hz}$ , 1 H), 2.47 – 2.35 (m, 5 H), 1.05 (s, 9 H); IR (neat) 3447, 3069, 2931, 2857, 1738, 1472, 1454, 1389, 1362, 1243, 1029, 941, 823  $\text{cm}^{-1}$ ; HRMS (EI) calcd for  $\text{C}_{30}\text{H}_{36}\text{O}_3\text{Si}$  [ $\text{M} + \text{Na}^+$ ] 495.2326 found 495.2320.

### 2-Acetyloxy-(*R*)-1-benzyloxy-7-[(*tert*-butyldiphenylsilyl)oxy]-hept-4-yne (**10b**)

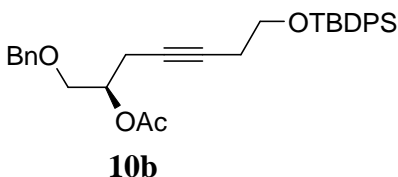

To a solution of propargyl alcohol **10a** (6.70 g, 14.17 mmol) in  $\text{CH}_2\text{Cl}_2$  (100 mL) at  $0\text{ }^{\circ}\text{C}$  was added  $\text{Et}_3\text{N}$  (4.98 mL, 35.43 mmol) and 4-DMAP (5 mg, 0.04 mmol), followed by the dropwise addition of  $\text{Ac}_2\text{O}$  (1.47 mL, 15.59 mmol). The reaction was stirred from  $0\text{ }^{\circ}\text{C}$  to room temperature over 24 h before it was quenched with saturated aq.  $\text{NH}_4\text{Cl}$  solution. The reaction mixture was diluted with ether. The organic layer was separated, washed with  $\text{H}_2\text{O}$ , brine, dried over  $\text{MgSO}_4$ , and concentrated. The crude residue was purified by flash column chromatography on silica gel (10 – 20% EtOAc in hexanes) to afford the product **10b** (5.82 g, 80% yield) as a colorless oil:

$[\alpha]_D^{25} = -12.2$  ( $c$  7.85,  $\text{CHCl}_3$ );  $^1\text{H}$  NMR (400 MHz,  $\text{CDCl}_3$ )  $\delta$  7.68 – 7.66 (m, 4 H), 7.44 – 7.35 (m, 6 H), 7.33 – 7.23 (m, 4 H), 5.30 – 5.00 (m, 1 H), 4.52 (dd,  $J = 12.1, 8.2$  Hz, 2 H), 3.73 (t,  $J = 11.3$  Hz, 2 H), 3.61 (d,  $J = 2.4$  Hz, 2 H), 2.57 – 2.43 (m, 2 H), 2.41 – 2.36 (m, 2 H), 2.10 (s, 3 H), 2.03 (s, 9 H);  $^{13}\text{C}$  NMR (100 Mz,  $\text{CDCl}_3$ )  $\delta$  170.8, 138.5, 138.4, 134.1, 130.1, 128.8, 128.1, 128.0, 79.7, 77.6, 76.5, 73.6, 71.5, 70.0, 63.1, 27.2, 23.3, 21.5, 21.5, 19.6; IR (neat) 3070, 3030, 2931, 2858, 1740, 1589, 1496, 1472, 1454, 1428, 1373, 1237, 1110, 1057, 1028, 960, 916, 823, 737  $\text{cm}^{-1}$ ; HRMS (EI) calcd for  $\text{C}_{32}\text{H}_{38}\text{O}_4\text{Si}$  [ $\text{M} + \text{Na}^+$ ] 537.2432 found 537.2421.

**2-Acetyloxy-(*E,R*)-1-Benzyloxy-7-[(*tert*-butyldiphenylsilyl)oxy]-4-triethylsilyl-hept-4-ene (11a)**  
**and**  
**2-Acetyloxy-(*R,E*)-1-Benzyloxy-7-[(*tert*-butyldiphenylsilyl)oxy]-5-triethylsilyl-hept-4-ene (11b)**

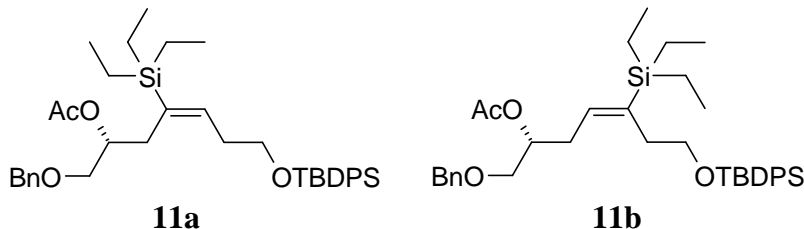

To a flask containing alkyne **10b** (9.80 g, 20.98 mmol) and  $\text{Et}_3\text{SiH}$  (4.02 mL, 25.18 mmol) at room temperature was added  $\text{H}_2\text{PtCl}_6 \cdot \text{H}_2\text{O}$  catalyst (52 mg, 0.12 mmol). The resulting mixture was heated at 80  $^\circ\text{C}$  for 40 min before it was cooled to room temperature and purified by flash column chromatography on silica gel (1 – 2%  $\text{EtOAc}$  in hexanes) to provide a mixture of products (13.08 g, 99% yield, **11a** : **11b** = 1.8 : 1) as colorless oils. This mixture was used directly in the next step.

**(*R,E*)-1-Benzyloxy-7-[(*tert*-butyldiphenylsilyl)oxy]-5-triethylsilyl-hex-4-en-2-ol (7a)**  
**and**  
**(*R,E*)-1-Benzyloxy-7-[(*tert*-butyldiphenylsilyl)oxy]-4-triethylsilyl-hex-4-en-2-ol (7b)**

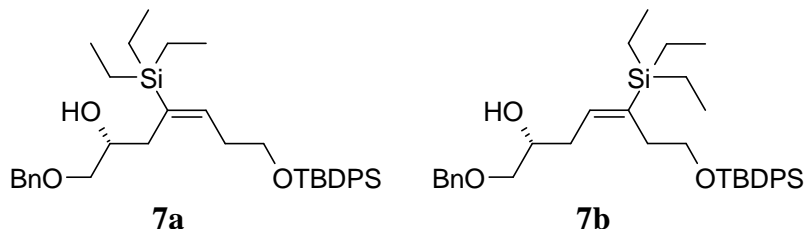

To a solution of acetates **11a** and **11b** (5.98 g, 9.48 mmol) in  $\text{CH}_2\text{Cl}_2$  (100 mL) at  $-78$   $^\circ\text{C}$  was added dropwise a solution of DIBAL-H (1.0 M in toluene, 14.22 mL, 1.50 mmol). The reaction was stirred at the same temperature for 1 h before it was quenched with *i*-

PrOH. The reaction mixture was diluted with EtOAc and 25% aq. Rocelle's salt solution and stirred at room temperature over a period of 3 h. The organic layer was separated, washed with H<sub>2</sub>O, brine, dried over MgSO<sub>4</sub> and concentrated. The crude residue was purified by flash column chromatography on silica gel (10% EtOAc in hexanes) to provide a regioisomeric mixture of alcohols **7a** and **7b** (5.26 g, 94% yield, **7a** : **7b** = 1.8 : 1) as a colorless oil. A portion of this product mixture was re-purified using the same condition above to give **7a** first and then the more polar **7b**:

**7a**:  $[\alpha]_D^{25} = 8.8$  (c 9.72, CHCl<sub>3</sub>); <sup>1</sup>H NMR (400 MHz, CDCl<sub>3</sub>) δ 7.68 – 7.66 (m, 4 H), 7.43 – 7.26 (m, 11 H), 5.98 (t, *J* = 6.8 Hz, 1 H), 4.54 (dd, *J* = 17.5, 5.6 Hz, 2 H), 3.84 – 3.77 (m, 1 H), 3.69 (t, *J* = 6.3 Hz, 2 H), 3.48 – 3.35 (m, 2 H), 2.55 – 2.41 (1 H), 2.40 – 2.26 (m, 3 H), 1.04 (s, 9 H), 0.91 (t, *J* = 7.9 Hz, 9 H), 0.58 (q, *J* = 3.8 Hz, 6 H); <sup>13</sup>C NMR (100 Mz, CDCl<sub>3</sub>) δ 141.9, 138.6, 136.0, 135.8, 134.2, 130.0, 128.8, 128.1, 128.1, 128.0, 74.6, 73.8, 70.5, 63.8, 34.6, 32.7, 27.2, 19.5, 7.8, 3.7; IR (neat) 3584, 3463, 3070, 2953, 2872, 1608, 1589, 1496, 1472, 1456, 1388, 1237, 1007, 939, 823 cm<sup>-1</sup>; HRMS (EI) calcd for C<sub>36</sub>H<sub>52</sub>O<sub>3</sub>Si<sub>2</sub> [M + H] 589.3527 found 589.3533.

**7b**:  $[\alpha]_D^{25} = -3.1$  (c 11.70, CHCl<sub>3</sub>); <sup>1</sup>H NMR (400 MHz, CDCl<sub>3</sub>) δ 7.68 – 7.63 (m, 4 H), 7.42 – 7.27 (m, 11 H), 5.73 (t, *J* = 6.9 Hz, 1 H), 4.51 (s, 2 H), 3.80 – 3.71 (m, 1 H), 3.52 – 3.43 (m, 2 H), 3.37 (dd, *J* = 9.5, 3.2 Hz, 1 H), 3.24 (dd, *J* = 9.4, 7.6 Hz, 1 H), 2.38 (t, *J* = 8.3 Hz, 1 H), 2.21 – 2.15 (m, 3 H), 1.04 (s, 9 H), 0.080 (t, *J* = 7.9 Hz, 9 H), 0.43 (q, *J* = 3.8 Hz, 6 H); <sup>13</sup>C NMR (100 Mz, CDCl<sub>3</sub>) δ 139.1, 138.4, 136.4, 136.0, 134.4, 130.0, 128.9, 128.2, 128.2, 128.0, 74.2, 73.8, 70.6, 63.4, 33.9, 32.9, 27.3, 19.5, 7.8, 3.2; IR (neat) 3584, 3456, 3070, 3030, 2999, 1610, 1589, 1496, 1472, 1456, 1421, 1390, 1361, 1237, 1007, 823 cm<sup>-1</sup>; HRMS (EI) calcd for C<sub>36</sub>H<sub>52</sub>O<sub>3</sub>Si<sub>2</sub> [M + H] 589.3527 found 589.3533.

**(2*R*,3*R*,5*R*)-5-(Benzyloxymethyl)-2-([2-(*tert*-butyldiphenylsilyl)oxy]-ethyl)-3-triethylsilyl-tetrahydrofuran (12a)**

and

**(2*S*,3*S*,5*R*)-5-(Benzyloxymethyl)-2-([2-(*tert*-butyldiphenylsilyl)oxy]-ethyl)-3-triethylsilyl-tetrahydrofuran (12b)**

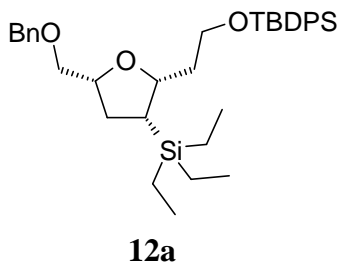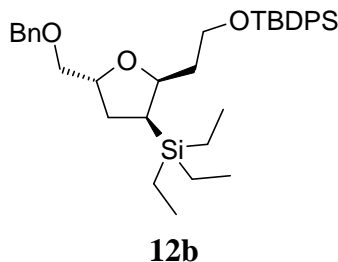

To a solution of a mixture of alcohols **7a** and **7b** (1.26 g, 2.20 mmol) in CHCl<sub>3</sub> (80 mL) at room temperature was added TsOH•H<sub>2</sub>O (41 mg, 0.22 mmol). The reaction was then heated at 60 °C for 7 h and then at 70 °C for 15 h before it was allowed to cool to ambient

temperature. Et<sub>3</sub>N (5 drops) was added to the reaction mixture before it was concentrated under reduced pressure. The crude residue was purified by flash column chromatography on silica gel (2 – 15% EtOAc in hexanes) to provide furan **12a** (72 mg, 6% yield) first and followed by the more polar **12b** (637 mg, 51% yield) as colorless oils:

**12a:**  $[\alpha]_D^{25} = -27.5$  (*c* 3.57, CHCl<sub>3</sub>); <sup>1</sup>H NMR (300 MHz, CDCl<sub>3</sub>)  $\delta$  7.73 – 7.69 (m, 4 H), 7.47 – 7.27 (m, 11 H), 4.57 (dd, *J* = 17.9, 12.2 Hz, 2 H), 4.48 – 4.40 (m, 1 H), 4.12 – 4.04 (m, 1 H), 3.89 – 3.76 (m, 2 H), 3.42 – 3.33 (m, 2 H), 1.96 – 1.78 (m, 2 H), 1.60 – 1.46 (m, 3 H), 1.08 (s, 9 H), 0.98 (t, *J* = 8.2 Hz, 9 H), 0.64 – 0.52 (m, 6 H); <sup>13</sup>C NMR (75 Mz, CDCl<sub>3</sub>)  $\delta$  138.5, 135.6, 135.5, 134.2, 134.0, 129.5, 129.5, 128.3, 127.7, 127.6, 127.5, 78.9, 75.2, 73.3, 73.0, 61.7, 36.6, 29.9, 27.9, 19.2, 7.8, 3.7; IR (neat) 3070, 3049, 2953, 2875, 2856, 1472, 1455, 1428, 1389, 1361, 1241, 1197, 1111, 1016, 940, 823, 701 cm<sup>-1</sup>; HRMS (EI) calcd for C<sub>36</sub>H<sub>52</sub>O<sub>3</sub>Si<sub>2</sub> [*M* + *H*] 611.3347 found 611.3336.

**12b:**  $[\alpha]_D^{25} = 54.4$  (*c* 3.09, CHCl<sub>3</sub>); <sup>1</sup>H NMR (300 MHz, CDCl<sub>3</sub>)  $\delta$  7.74 – 7.68 (m, 4 H), 7.46 – 7.26 (m, 11 H), 4.52 (dd, *J* = 17.9, 12.2 Hz, 2 H), 4.45 – 4.38 (m, 1 H), 4.05 – 3.97 (m, 1 H), 3.88 – 3.77 (m, 2 H), 3.47 – 3.38 (m, 2 H), 2.06 – 1.98 (m, 1 H), 1.70 – 1.46 (m, 4 H), 1.07 (s, 9 H), 1.00 (t, *J* = 8.9 Hz, 9 H), 0.64 – 0.56 (m, 6 H); <sup>13</sup>C NMR (75 Mz, CDCl<sub>3</sub>)  $\delta$  137.6, 134.7, 134.7, 133.3, 133.1, 128.5, 127.3, 126.6, 126.5, 77.9, 77.4, 73.1, 72.3, 60.7, 38.0, 30.1, 28.7, 25.9, 18.2, 6.8, 2.8; IR (neat) 3070, 2954, 2875, 1589, 1496, 1472, 1455, 1428, 1389, 1361, 1306, 1240, 1192, 1016, 939, 823, 701 cm<sup>-1</sup>; HRMS (EI) calcd for C<sub>36</sub>H<sub>52</sub>O<sub>3</sub>Si<sub>2</sub> [*M* + *H*] 611.3347 found 611.3336.

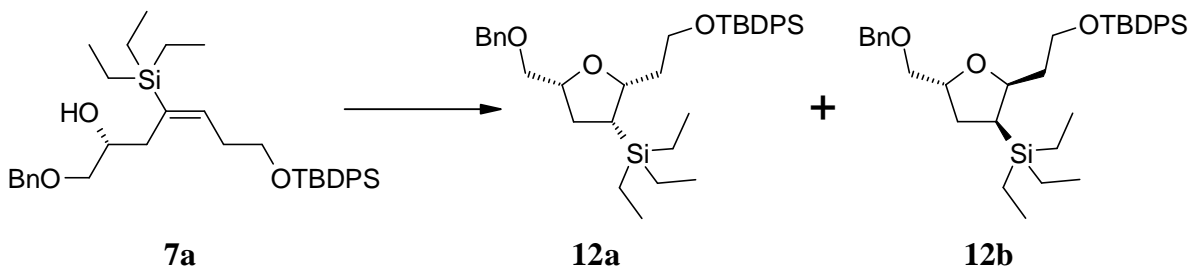

To a solution of allylic alcohol **7a** (5.78 g, 10.09 mmol) in CHCl<sub>3</sub> (200 mL) at room temperature was added TsOH (100 mg, 0.53 mmol). The reaction was then heated at 55 °C for 2 days before it was concentrated under reduced pressure. The crude residue was purified by flash column chromatography on silica gel (2 – 15% EtOAc in hexanes) to provide furan **12a** (723 mg, 13% yield) first and followed by the more polar **12b** (3.80 g, 66% yield). In addition, the starting material **7a** was also recovered (0.43 g).

**2-[(2*R*,3*R*,5*R*)-5-(Benzyloxymethyl)-3-triethylsilyl-tetrahydro-furan-2-yl]-ethanol  
(13)**

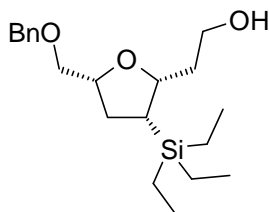

**13**

To a solution of silyl ether **12a** (1.56 g, 2.65 mmol) in THF (80 mL) at 0 °C was added dropwise a solution of TBAF (1.0 M in THF, 3.97 mL, 3.97 mmol). The reaction was then stirred from 0 °C to room temperature over 3 h before it was quenched with saturated aq. NH<sub>4</sub>Cl solution. The reaction mixture was then extracted with EtOAc. The organic layer was washed with brine, dried over MgSO<sub>4</sub> and concentrated. The crude residue was purified by flash column chromatography on silica gel (10 – 40% EtOAc in hexanes) to provide alcohol **13** (932 mg, 100% yield) as a colorless oil:

$[\alpha]_D^{25} = 47.2$  (*c* 4.79, CHCl<sub>3</sub>); <sup>1</sup>H NMR (100 MHz, CDCl<sub>3</sub>) δ 7.37 – 7.24 (m, 5 H), 4.59 – 4.44 (m, 3 H), 4.28 – 4.21 (m, 1 H), 3.87 – 3.72 (m, 2 H), 3.43 – 3.32 (m, 2 H), 2.08 – 1.96 (m, 1 H), 1.90 – 1.82 (m, 1 H), 1.76 – 1.53 (m, 2H), 1.46 – 1.38 (m, 1 H), 0.98 – 0.92 (m, 9 H), 0.66 – 0.54 (m, 6 H); <sup>13</sup>C NMR (75 Mz, CDCl<sub>3</sub>) δ 138.6, 128.7, 128.0, 128.0, 83.9, 76.2, 73.7, 73.1, 62.8, 35.6, 30.3, 28.7, 8.1, 4.1; IR (neat) 3441, 3064, 3030, 2952, 2875, 1496, 1454, 1417, 1375, 1240, 1067, 1016, 732, 697 cm<sup>-1</sup>; HRMS (EI) calcd for C<sub>20</sub>H<sub>34</sub>O<sub>3</sub>Si [M + H] 351.2350 found 351.2348.

**[(2*R*,3*R*,5*R*)-5-(Benzyloxymethyl)-3-triethylsilyl-tetrahydro-furan-2-yl] acetaldehyde  
(6)**

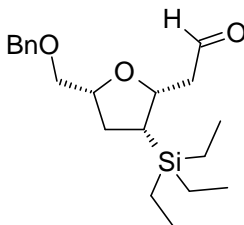

**6**

To a solution of alcohol **13** (0.88 g, 2.51 mmol) in CH<sub>2</sub>Cl<sub>2</sub> (25 mL) at 0 °C was added NaHCO<sub>3</sub> (0.53 g, 6.28 mmol) and followed by Dess-Martin periodinane (1.38 g, 3.26 mmol) in small portions. The reaction was then stirred from 0 °C to room temperature over 1 h before it was diluted with EtOAc. The organic layer was washed with H<sub>2</sub>O, brine, dried over MgSO<sub>4</sub> and concentrated to yield the crude aldehyde **6** (0.84 g, 96% yield) as a colorless oil:

$[\alpha]_D^{25} = 69.6$  (*c* 6.98,  $\text{CHCl}_3$ );  $^1\text{H}$  NMR (300 MHz,  $\text{CDCl}_3$ )  $\delta$  9.77 – 9.75 (m, 1 H), 7.37 – 7.24 (m, 5 H), 4.80 – 4.73 (m, 1 H), 4.54 (s, 2 H), 4.07 – 3.99 (m, 1 H), 3.56 – 3.46 (m, 2 H), 2.51 (ddd,  $J = 14.8, 11.3, 3.2$  Hz, 1 H), 2.31 – 2.20 (m, 1 H), 2.09 – 1.98 (m, 1 H), 1.78 – 1.62 (m, 2 H), 0.94 (t,  $J = 7.9$  Hz, 9 H), 0.63 – 0.53 (m, 6 H);  $^{13}\text{C}$  NMR (75 Mz,  $\text{CDCl}_3$ )  $\delta$  202.8, 138.7, 128.8, 128.1, 128.0, 80.0, 77.6, 73.9, 73.3, 50.1, 30.9, 30.1, 8.1, 4.1; IR (neat) 3064, 3030, 2954, 2910, 2875, 2732, 1727, 1455, 1418, 1363, 1310, 1241, 1192, 1098, 1076, 1017, 948, 732, 698  $\text{cm}^{-1}$ ; HRMS (EI) calcd for  $\text{C}_{20}\text{H}_{32}\text{O}_3\text{Si}$  [ $\text{M} + \text{H}$ ] 349.2194 found 349.2192.

**4-[(2*R*,3*R*,5*R*)-5-(Benzyloxymethyl)-3-triethylsilyl-tetrahydro-furan-2-yl]-3-oxo-butylric acid ethyl ester (**15**)**

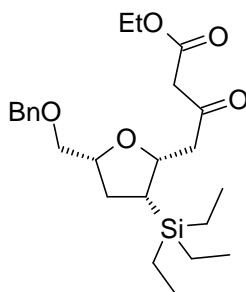

**15**

To a solution of ethyl diazoacetate (196 mg, 1.72 mmol) in  $\text{CH}_2\text{Cl}_2$  (6 mL) at room temperature was added anhydrous  $\text{SnCl}_2$  (27 mg, 0.14 mmol). The cloudy reaction mixture was stirred for 15 min and followed by addition of a solution of aldehyde **6** (500 mg, 1.43 mmol) in  $\text{CH}_2\text{Cl}_2$  (6 mL). The resulting mixture was stirred for 2 h before it was concentrated. The crude residue was purified by flash column chromatography on silica gel (10 – 15% EtOAc in hexanes) to provide  $\beta$ -keto ester **15** (436 mg, 70% yield) and the more polar oxocene **4** (104 mg, 23% yield) both as colorless oils:

$\beta$ -keto ester **15**:  $[\alpha]_D^{25} = 90.5$  (*c* 4.31,  $\text{CHCl}_3$ );  $^1\text{H}$  NMR (300 MHz,  $\text{CDCl}_3$ )  $\delta$  7.36 – 7.26 (m, 5 H), 4.69 – 4.62 (m, 1 H), 4.54 (s, 2 H), 4.18 – 4.10 (m, 2 H), 4.06 – 3.93 (m, 1 H), 3.58 – 3.47 (m, 4 H), 2.69 (dd,  $J = 13.9, 11.3$  Hz, 1 H), 2.38 (dd,  $J = 13.9, 2.6$  Hz, 1 H), 2.03 – 1.95 (m, 1 H), 1.77 – 1.63 (m, 2 H), 1.27 – 1.19 (m, 3 H), 1.00 – 0.92 (m, 9 H), 0.65 – 0.52 (m, 6 H);  $^{13}\text{C}$  NMR (75 Mz,  $\text{CDCl}_3$ )  $\delta$  202.7, 167.8, 138.7, 128.8, 128.1, 128.0, 79.7, 79.0, 72.9, 61.5, 50.5, 49.5, 30.7, 30.2, 14.5, 8.1, 4.1; IR (neat) 3030, 2954, 2910, 2875, 1745, 1717, 1653, 1496, 1455, 1416, 1368, 1240, 1196, 1096, 1029, 802, 733, 698  $\text{cm}^{-1}$ ; HRMS (EI) calcd for  $\text{C}_{24}\text{H}_{38}\text{O}_5\text{Si}$  [ $\text{M} + \text{H}$ ] 457.2381 found 457.2373.

**(2*S*,3*S*,8*R*,*Z*)-8-(Benzyloxymethyl)-3-hydroxy-3,4,7,8-tetrahydro-(2*H*)-oxocine-2-carboxylic acid ethyl ester (4)**

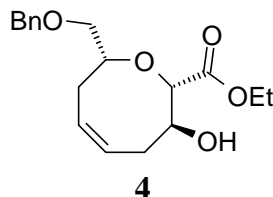

$[\alpha]_D^{25} = 32.5$  (*c* 3.43, CHCl<sub>3</sub>); <sup>1</sup>H NMR (400 MHz, CDCl<sub>3</sub>)  $\delta$  7.35 – 7.27 (m, 5 H), 5.96 – 5.85 (m, 2 H), 4.57 (s, 2 H), 4.25 – 4.13 (m, 3 H), 3.90 (d, *J* = 9.4 Hz, 1 H), 3.74 – 3.66 (m, 1 H), 3.60 (dd, *J* = 5.5, 4.3 Hz, 1 H), 3.45 (dd, *J* = 5.4, 4.3 Hz, 1 H), 3.00 (m, 1H), 2.83 – 2.74 (m, 1 H), 2.44 – 2.22 (m, 3 H), 1.25 (t, *J* = 7 Hz, 3 H); <sup>13</sup>C NMR (100 Mz, CDCl<sub>3</sub>)  $\delta$  174.2, 138.6, 138.5, 129.6, 129.6, 128.8, 128.0, 82.7, 81.3, 73.7, 73.3, 73.0, 65.0, 61.8, 31.6, 31.0, 14.5; IR (neat) 3462, 3027, 2980, 2932, 1740, 1497, 1454, 1373, 1323, 1245, 1182, 1097, 1041, 737, 698 cm<sup>-1</sup>; HRMS (EI) calcd for C<sub>18</sub>H<sub>24</sub>O<sub>5</sub> [M + H] 321.1697 found 321.1694.

**2-[(2*S*,3*S*,5*R*)-5-(Benzyloxymethyl)-3-triethylsilyl-tetrahydro-furan-2-yl]-ethanol (13b)**

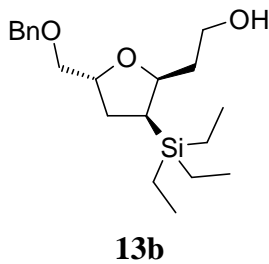

$[\alpha]_D^{25} = -29.3$  (*c* 6.10, CHCl<sub>3</sub>); <sup>1</sup>H NMR (400 MHz, CDCl<sub>3</sub>)  $\delta$  7.36 – 7.27 (m, 5 H), 4.55 (dd, *J* = 12, 17 Hz, 2 H), 4.5 – 4.45 (m, 1 H), 4.28 – 4.22 (m, 1 H), 3.87 – 3.73 (m, 2 H), 3.42 – 3.18 (m, 2 H), 3.16 (dd, *J* = 2, 9 Hz, 1 H), 2.07 – 1.99 (m, 1 H), 1.89 – 1.83 (m, 1 H), 1.75 – 1.64 (m, 1 H), 1.62 – 1.55 (m, 1 H), 1.45 – 1.38 (m, 1 H), 0.97 (t, *J* = 8 Hz, 9 H), 0.65 – 0.55 (m, 6 H); <sup>13</sup>C NMR (100 Mz, CDCl<sub>3</sub>)  $\delta$  138.6, 128.7, 128.0, 83.9, 76.1, 73.7, 73.1, 62.7, 35.6, 30.2, 28.6, 8.1, 4.1; IR (neat) 3441, 3063, 3030, 2950, 2909, 2875, 1496, 1454, 1417, 1374, 1241, 1090, 1047, 1017, 732, 697 cm<sup>-1</sup>; HRMS (EI) calcd for C<sub>20</sub>H<sub>34</sub>O<sub>3</sub>Si [M + H] 351.2350 found 351.2351.



**[(2*S*,3*S*,5*R*)-5-(Benzyloxymethyl)-3-triethylsilyl-tetrahydro-furan-2-yl]-acetaldehyde (6b)**

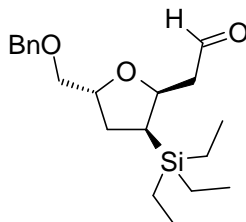

**6b**

$[\alpha]_D^{25} = -47.9$  ( $c$  4.70,  $\text{CHCl}_3$ );  $^1\text{H}$  NMR (400 MHz,  $\text{CDCl}_3$ )  $\delta$  9.79 – 9.78 (m, 1 H), 7.35 – 7.26 (m, 5 H), 4.85 – 4.80 (m, 1 H), 4.54 (dd,  $J = 12, 17$  Hz, 2 H), 4.27 – 4.20 (m, 1 H), 3.42 – 3.33 (m, 2 H), 2.51 (ddd,  $J = 15, 11, 3$  Hz, 1 H), 2.30 – 2.26 (m, 1 H), 2.05 – 1.88 (m, 2 H), 1.72 – 1.62 (m, 1 H), 0.96 (t,  $J = 8$  Hz, 9 H), 0.63 – 0.53 (m, 6 H);  $^{13}\text{C}$  NMR (100 Mz,  $\text{CDCl}_3$ )  $\delta$  202.2, 138.6, 128.7, 128.1, 128.0, 77.9, 76.4, 73.7, 73.0, 65.2, 48.2, 30.1, 28.2, 8.1, 4.0; IR (neat) 3030, 2953, 2910, 2875, 2732, 1727, 1454, 1415, 1241, 1161, 1096, 1017, 803, 733, 698  $\text{cm}^{-1}$ ; HRMS (EI) calcd for  $\text{C}_{20}\text{H}_{32}\text{O}_3\text{Si}$  [ $\text{M} + \text{H}$ ] 349.2194 found 349.2194.

**(2*R*,3*R*,8*R*,*Z*)-8-(Benzyloxymethyl)-3-hydroxy-3,4,7,8-tetrahydro-(2*H*)-oxocine-2-carboxylic acid ethyl ester (20)**

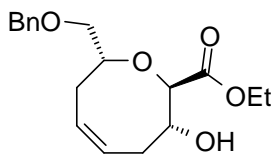

**20**

$^1\text{H}$  NMR (400 MHz,  $\text{CDCl}_3$ )  $\delta$  7.36 – 7.27 (m, 5 H), 5.91 – 5.74 (m, 2 H), 4.53 (s, 2 H), 4.22 – 4.15 (m, 3 H), 4.02 – 3.91 (m, 2 H), 3.64 (ddd,  $J = 6, 10, 17$  Hz, 2 H), 2.75 (d,  $J = 4.5$  Hz, 1 H), 2.59 – 2.53 (m, 1 H), 2.43 – 2.31 (m, 3H), 1.24 (t,  $J = 7$  Hz, 3 H);  $^{13}\text{C}$  NMR (100 Mz,  $\text{CDCl}_3$ )  $\delta$  173.4, 138.3, 128.9, 128.8, 128.8, 128.1, 128.0, 77.6, 76.0, 75.5, 73.6, 72.5, 71.2, 65.0, 61.7, 33.3, 29.3, 14.5; IR (neat) 3462, 3027, 2980, 2932, 1740, 1497, 1454, 1373, 1323, 1245, 1182, 1097, 1041, 737, 698  $\text{cm}^{-1}$ ; HRMS (EI) calcd for  $\text{C}_{18}\text{H}_{24}\text{O}_5$  [ $\text{M} + \text{H}$ ] 321.1697 found 321.1693.





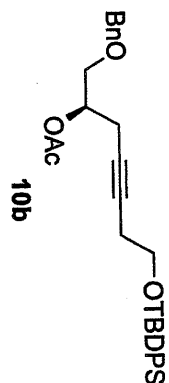

Current Data Parameters

| NAME    | VALUE             |
|---------|-------------------|
| EXPNO   | 11                |
| PROCNO  | 1                 |
| PROC    | 1                 |
| NAME    | 2000023           |
| INSTRUM | INSTRUM           |
| PROBHD  | 5 mm PABBO BB/    |
| PULPROG | zgpg30            |
| TD      | 32768             |
| SOLVENT | CDCl <sub>3</sub> |
| DS      | 2                 |
| SWH     | 23980.814 Hz      |
| FIDRES  | 0.731836 Hz       |
| AQ      | 0.6832628 sec     |
| RG      | 2298.8            |
| DE      | 6.00 usec         |
| TE      | 298.7 K           |
| D1      | 0.20000000 sec    |
| d11     | 0.03000000 sec    |
| DECTA   | 0.10000000 sec    |
| TD0     | 1                 |

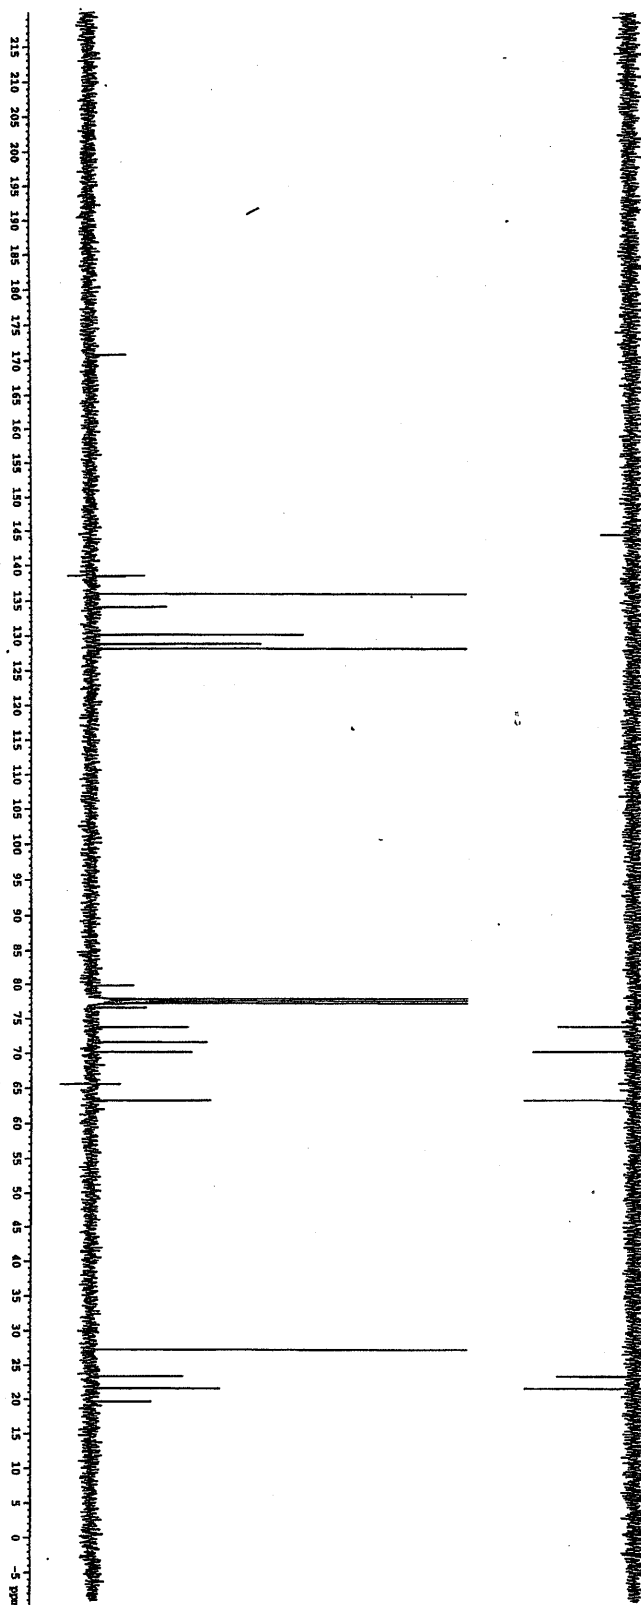

===== CHANNEL F1 =====  
 NUCL1 13C  
 P1 9.00 usec  
 PL1 9.00 dB  
 SFO1 100.6237964 MHz

===== CHANNEL F2 =====  
 walte16  
 CHDPG2 1H  
 NUCL2 1H  
 P2 107.25 usec  
 PL2 23.00 dB  
 SFO2 400.1316005 MHz

F2 - Processing parameters  
 SF 100.6127296 MHz  
 WDW RM  
 SSB 0  
 LB 1.00 Hz  
 GB 0  
 PC 1.40

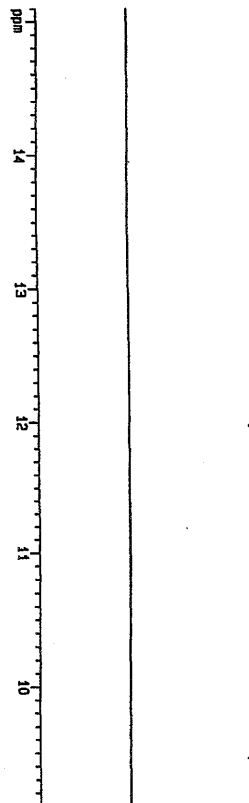

| Chemical Shift (ppm) | Integration | Assignment   |
|----------------------|-------------|--------------|
| 11.5                 | 1.00        | OH           |
| 7.3                  | 1.00        | 3H, aromatic |
| 7.0                  | 1.00        | 3H, aromatic |
| 6.8                  | 1.00        | 3H, aromatic |
| 6.5                  | 1.00        | 3H, aromatic |
| 6.2                  | 1.00        | 3H, aromatic |
| 5.8                  | 1.00        | 3H, aromatic |
| 5.5                  | 1.00        | 3H, aromatic |
| 5.2                  | 1.00        | 3H, aromatic |
| 4.8                  | 1.00        | 3H, aromatic |
| 4.5                  | 1.00        | 3H, aromatic |
| 4.2                  | 1.00        | 3H, aromatic |
| 3.8                  | 1.00        | 3H, aromatic |
| 3.5                  | 1.00        | 3H, aromatic |
| 3.2                  | 1.00        | 3H, aromatic |
| 2.8                  | 1.00        | 3H, aromatic |
| 2.5                  | 1.00        | 3H, aromatic |
| 2.2                  | 1.00        | 3H, aromatic |
| 1.8                  | 1.00        | 3H, aromatic |
| 1.5                  | 1.00        | 3H, aromatic |
| 1.2                  | 1.00        | 3H, aromatic |
| 0.8                  | 1.00        | 3H, aromatic |
| 0.5                  | 1.00        | 3H, aromatic |
| 0.2                  | 1.00        | 3H, aromatic |

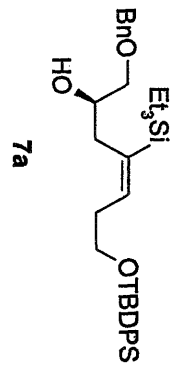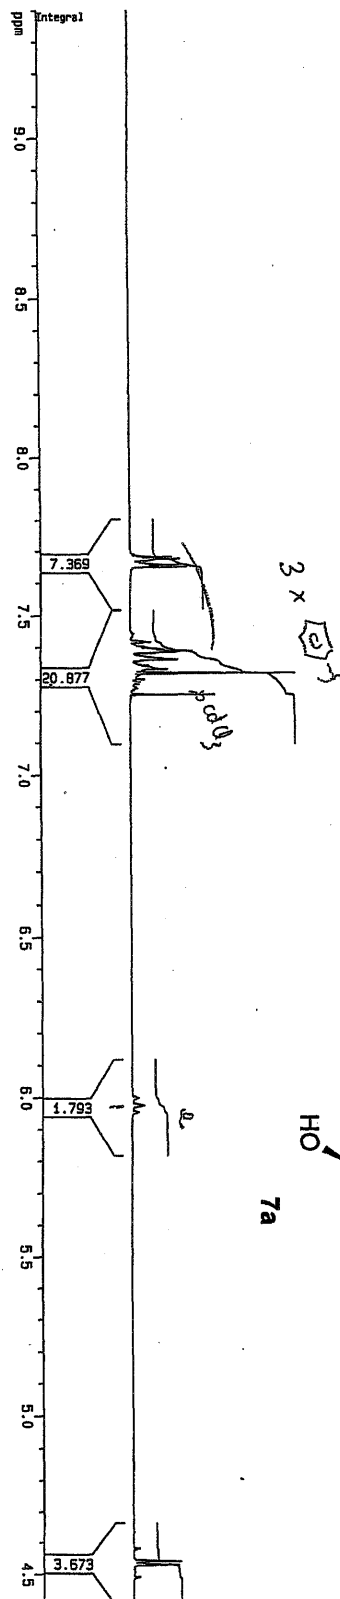

| Chemical Shift (ppm) | Integration | Assignment   |
|----------------------|-------------|--------------|
| 11.5                 | 1.00        | OH           |
| 7.3                  | 1.00        | 3C, aromatic |
| 7.0                  | 1.00        | 3C, aromatic |
| 6.8                  | 1.00        | 3C, aromatic |
| 6.5                  | 1.00        | 3C, aromatic |
| 6.2                  | 1.00        | 3C, aromatic |
| 5.8                  | 1.00        | 3C, aromatic |
| 5.5                  | 1.00        | 3C, aromatic |
| 5.2                  | 1.00        | 3C, aromatic |
| 4.8                  | 1.00        | 3C, aromatic |
| 4.5                  | 1.00        | 3C, aromatic |
| 4.2                  | 1.00        | 3C, aromatic |
| 3.8                  | 1.00        | 3C, aromatic |
| 3.5                  | 1.00        | 3C, aromatic |
| 3.2                  | 1.00        | 3C, aromatic |
| 2.8                  | 1.00        | 3C, aromatic |
| 2.5                  | 1.00        | 3C, aromatic |
| 2.2                  | 1.00        | 3C, aromatic |
| 1.8                  | 1.00        | 3C, aromatic |
| 1.5                  | 1.00        | 3C, aromatic |
| 1.2                  | 1.00        | 3C, aromatic |
| 0.8                  | 1.00        | 3C, aromatic |
| 0.5                  | 1.00        | 3C, aromatic |
| 0.2                  | 1.00        | 3C, aromatic |

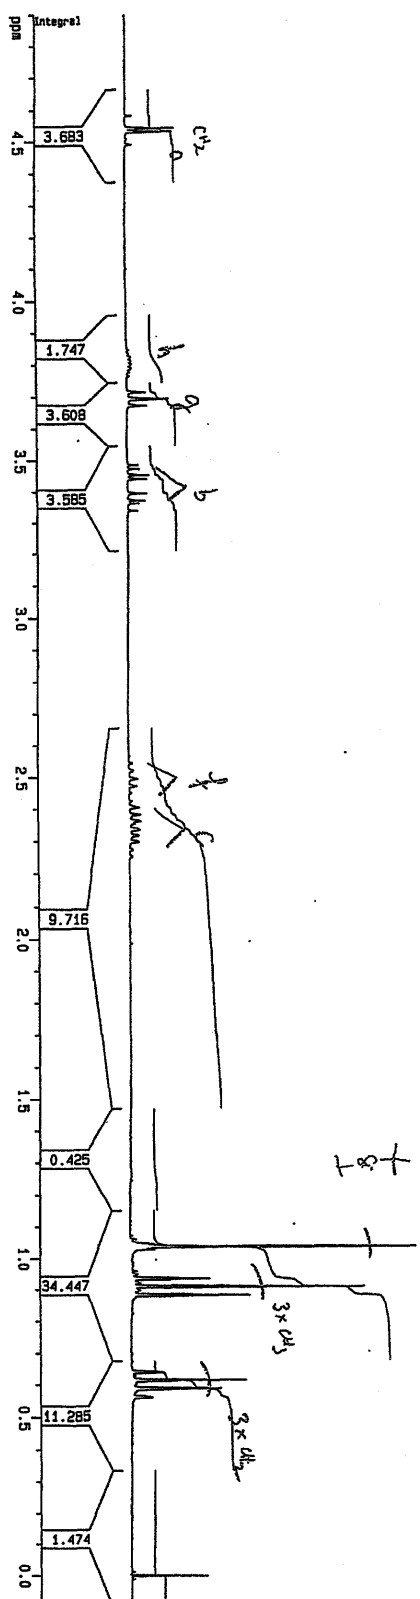

| Chemical Shift (ppm) | Integration | Assignment   |
|----------------------|-------------|--------------|
| 11.5                 | 1.00        | OH           |
| 7.3                  | 1.00        | 3H, aromatic |
| 7.0                  | 1.00        | 3H, aromatic |
| 6.8                  | 1.00        | 3H, aromatic |
| 6.5                  | 1.00        | 3H, aromatic |
| 6.2                  | 1.00        | 3H, aromatic |
| 5.8                  | 1.00        | 3H, aromatic |
| 5.5                  | 1.00        | 3H, aromatic |
| 5.2                  | 1.00        | 3H, aromatic |
| 4.8                  | 1.00        | 3H, aromatic |
| 4.5                  | 1.00        | 3H, aromatic |
| 4.2                  | 1.00        | 3H, aromatic |
| 3.8                  | 1.00        | 3H, aromatic |
| 3.5                  | 1.00        | 3H, aromatic |
| 3.2                  | 1.00        | 3H, aromatic |
| 2.8                  | 1.00        | 3H, aromatic |
| 2.5                  | 1.00        | 3H, aromatic |
| 2.2                  | 1.00        | 3H, aromatic |
| 1.8                  | 1.00        | 3H, aromatic |
| 1.5                  | 1.00        | 3H, aromatic |
| 1.2                  | 1.00        | 3H, aromatic |
| 0.8                  | 1.00        | 3H, aromatic |
| 0.5                  | 1.00        | 3H, aromatic |
| 0.2                  | 1.00        | 3H, aromatic |



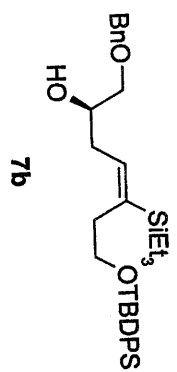

| FD-100, 00000 Hz | WAVE=715151 | EXPNO=10   | PROG=10       |
|------------------|-------------|------------|---------------|
| FD-100, 00000 Hz | FE=1.00000  | MI=0.00000 | MC=10000.0000 |
| #                | FREQUENCY   | INTENSITY  |               |
|                  | PHI         | IPHI       |               |
| 1                | 8832.9      | 2315.052   | 7.7197 0.19   |
| 2                | 8838.7      | 2314.726   | 7.7124 1.31   |
| 3                | 8843.1      | 2313.677   | 7.7068 1.97   |
| 4                | 8847.5      | 2312.850   | 7.7019 0.71   |
| 5                | 8851.9      | 2309.284   | 7.6845 0.98   |
| 6                | 8858.1      | 2307.338   | 7.6877 1.79   |
| 7                | 8863.5      | 2305.200   | 7.6869 0.69   |
| 8                | 7033.8      | 2298.120   | 7.6988 0.15   |
| 9                | 7040.3      | 2298.367   | 7.4527 1.13   |
| 10               | 7046.5      | 2298.362   | 7.4332 0.09   |
| 11               | 7052.9      | 2294.592   | 7.4387 0.81   |
| 12               | 7057.2      | 2294.815   | 7.4118 2.25   |
| 13               | 7060.0      | 2292.705   | 7.4557 1.48   |
| 14               | 7065.8      | 2291.644   | 7.3933 1.46   |
| 15               | 7101.8      | 2292.362   | 7.3710 0.63   |
| 16               | 7108.5      | 2291.444   | 7.3392 0.03   |
| 17               | 7120.7      | 2297.185   | 7.3549 2.48   |
| 18               | 7126.8      | 2295.571   | 7.3466 1.87   |
| 19               | 7131.8      | 2292.384   | 7.3419 0.59   |
| 20               | 7134.1      | 2292.544   | 7.3509 0.40   |
| 21               | 7141.2      | 2189.392   | 7.3278 0.33   |
| 22               | 7147.5      | 2187.073   | 7.3278 0.34   |
| 23               | 7173.0      | 2187.207   | 7.2874 1.05   |
| 24               | 8356.0      | 1735.329   | 5.7633 0.24   |
| 25               | 8374.1      | 1738.046   | 5.7659 0.51   |
| 26               | 8383.3      | 1732.158   | 5.7378 0.25   |
| 27               | 8333.8      | 1732.985   | 4.5410 3.12   |
| 28               | 8521.3      | 1138.811   | 3.7444 0.14   |
| 29               | 8527.0      | 1092.018   | 3.5381 0.35   |
| 30               | 10143.1     | 1054.125   | 3.5124 0.39   |
| 31               | 10148.4     | 1052.202   | 3.3559 0.51   |
| 32               | 10151.6     | 1052.773   | 3.4818 0.41   |
| 33               | 10219.1     | 1028.540   | 3.4273 0.41   |
| 34               | 10218.8     | 1028.395   | 3.4653 0.42   |
| 35               | 10295.1     | 1019.138   | 3.3636 0.73   |
| 36               | 10295.3     | 1019.088   | 3.3949 0.58   |
| 37               | 10397.2     | 881.521    | 3.3028 0.15   |
| 38               | 10327.0     | 884.052    | 3.2787 0.61   |
| 39               | 10374.1     | 853.624    | 3.2773 0.45   |
| 40               | 10351.9     | 847.540    | 3.2871 0.40   |
| 41               | 10986.8     | 731.814    | 2.4078 0.40   |
| 42               | 11010.8     | 723.028    | 2.4087 0.41   |
| 43               | 11031.8     | 719.139    | 2.3938 0.38   |
| 44               | 11157.1     | 658.548    | 2.2275 0.58   |
| 45               | 11184.1     | 681.743    | 2.2948 1.05   |
| 46               | 11258.8     | 658.158    | 2.1825 0.48   |
| 47               | 11626.8     | 478.797    | 1.5886 0.90   |
| 48               | 12057.4     | 323.967    | 1.8784 0.78   |
| 49               | 12065.0     | 321.051    | 1.6867 0.50   |
| 50               | 12072.9     | 318.387    | 1.6867 0.70   |
| 51               | 12163.0     | 283.877    | 0.9452 0.41   |
| 52               | 12212.1     | 297.898    | 0.9528 0.78   |
| 53               | 12212.9     | 297.898    | 0.9454 0.30   |
| 54               | 12292.2     | 249.548    | 0.8319 7.22   |
| 55               | 12290.0     | 245.345    | 0.8286 0.28   |
| 56               | 12342.9     | 241.629    | 0.8278 0.78   |
| 57               | 12508.0     | 151.783    | 0.9267 1.00   |
| 58               | 12520.3     | 144.347    | 0.9268 3.72   |
| 59               | 12528.1     | 132.849    | 0.9455 0.68   |
| 60               | 12578.0     | 125.850    | 0.9455 0.58   |

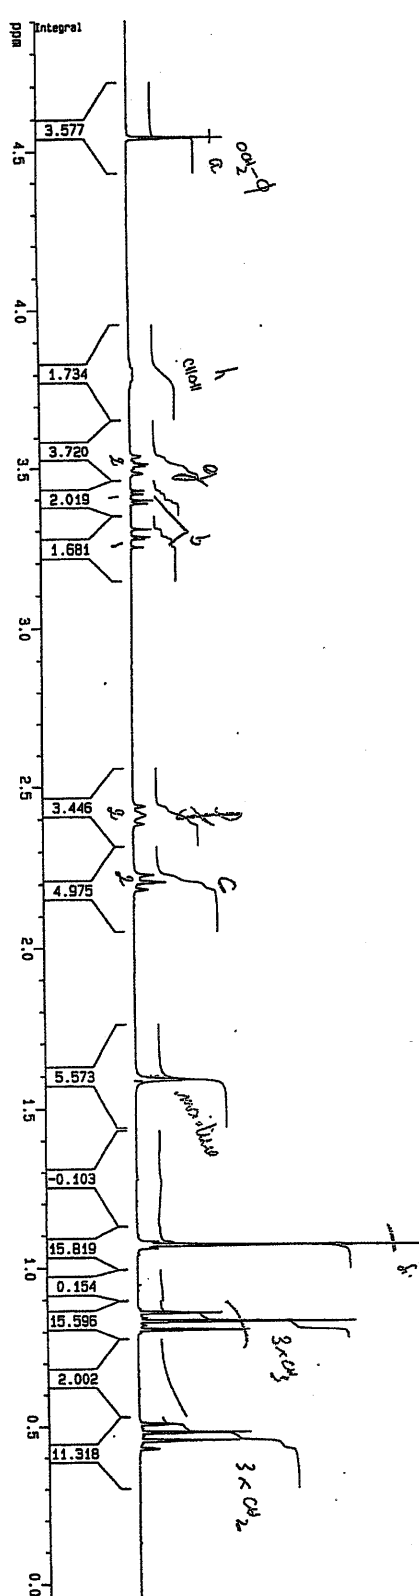

|         |                |
|---------|----------------|
| Time    | 15.06          |
| INSTRUM | spect          |
| NAME    | 5_m_04_13      |
| PROB    | 32769          |
| TD      | 32769          |
| SOLVENT | CDC13          |
| NS      | 16             |
| DS      | 5569.4 Hz      |
| SH      | 0.000000 sec   |
| STRESS  | 2.421400 sec   |
| AO      | .4095          |
| DE      | 90.000 us/c    |
| DN      | 114.70 us/c    |
| UN      | 300.13         |
| NS      | 1.0000000 sec  |
| Q1      | 11.25 us/c     |
| SPQ1    | 300.135175 MHz |
| NOISES  | 39             |

P2 - Processing parameters

|     |                |
|-----|----------------|
| P1  | 51             |
| ST  | 300.135393 MHz |
| NS  | 15854          |
| WDR | 64             |
| WDR | 64             |
| SSA | 0              |
| SSA | -0.20 Hz       |
| SB  | 0.3            |
| SB  | 4.00           |

10 WDR plot parameters

|      |               |
|------|---------------|
| CR   | 34.00 cm      |
| PR   | 14.00 Hz      |
| PR   | 14.00 Hz      |
| F2P  | -0.100 Hz     |
| F2   | -30.01 Hz     |
| PRCH | 4.13705 Hz/cm |

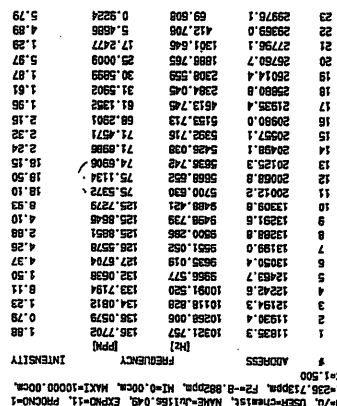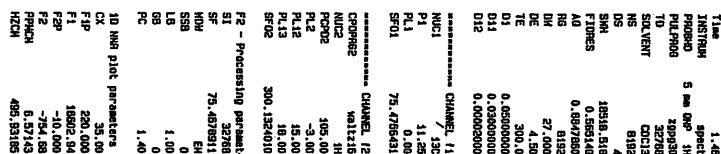



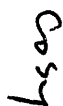CC(C)(C)OC1=CC=CC=C1C2=CC=CC=C2C3=CC=CC=C3C4=CC=CC=C4C5=CC=CC=C5C6=CC=CC=C6C7=CC=CC=C7C8=CC=CC=C8C9=CC=CC=C9C10=CC=CC=C10C11=CC=CC=C11C12=CC=CC=C12C13=CC=CC=C13C14=CC=CC=C14C15=CC=CC=C15C16=CC=CC=C16C17=CC=CC=C17C18=CC=CC=C18C19=CC=CC=C19C20=CC=CC=C20C21=CC=CC=C21C22=CC=CC=C22C23=CC=CC=C23C24=CC=CC=C24C25=CC=CC=C25C26=CC=CC=C26C27=CC=CC=C27C28=CC=CC=C28C29=CC=CC=C29C30=CC=CC=C30C31=CC=CC=C31C32=CC=CC=C32C33=CC=CC=C33C34=CC=CC=C34C35=CC=CC=C35C36=CC=CC=C36C37=CC=CC=C37C38=CC=CC=C38C39=CC=CC=C39C40=CC=CC=C40C41=CC=CC=C41C42=CC=CC=C42C43=CC=CC=C43C44=CC=CC=C44C45=CC=CC=C45C46=CC=CC=C46C47=CC=CC=C47C48=CC=CC=C48C49=CC=CC=C49C50=CC=CC=C50C51=CC=CC=C51C52=CC=CC=C52C53=CC=CC=C53C54=CC=CC=C54C55=CC=CC=C55C56=CC=CC=C56C57=CC=CC=C57C58=CC=CC=C58C59=CC=CC=C59C60=CC=CC=C60C61=CC=CC=C61C62=CC=CC=C62C63=CC=CC=C63C64=CC=CC=C64C65=CC=CC=C65C66=CC=CC=C66C67=CC=CC=C67C68=CC=CC=C68C69=CC=CC=C69C70=CC=CC=C70C71=CC=CC=C71C72=CC=CC=C72C73=CC=CC=C73C74=CC=CC=C74C75=CC=CC=C75C76=CC=CC=C76C77=CC=CC=C77C78=CC=CC=C78C79=CC=CC=C79C80=CC=CC=C80C81=CC=CC=C81C82=CC=CC=C82C83=CC=CC=C83C84=CC=CC=C84C85=CC=CC=C85C86=CC=CC=C86C87=CC=CC=C87C88=CC=CC=C88C89=CC=CC=C89C90=CC=CC=C90C91=CC=CC=C91C92=CC=CC=C92C93=CC=CC=C93C94=CC=CC=C94C95=CC=CC=C95C96=CC=CC=C96C97=CC=CC=C97C98=CC=CC=C98C99=CC=CC=C99C100=CC=CC=C100C101=CC=CC=C101C102=CC=CC=C102C103=CC=CC=C103C104=CC=CC=C104C105=CC=CC=C105C106=CC=CC=C106C107=CC=CC=C107C108=CC=CC=C108C109=CC=CC=C109C110=CC=CC=C110C111=CC=CC=C111C112=CC=CC=C112C113=CC=CC=C113C114=CC=CC=C114C115=CC=CC=C115C116=CC=CC=C116C117=CC=CC=C117C118=CC=CC=C118C119=CC=CC=C119C120=CC=CC=C120C121=CC=CC=C121C122=CC=CC=C122C123=CC=CC=C123C124=CC=CC=C124C125=CC=CC=C125C126=CC=CC=C126C127=CC=CC=C127C128=CC=CC=C128C129=CC=CC=C129C130=CC=CC=C130C131=CC=CC=C131C132=CC=CC=C132C133=CC=CC=C133C134=CC=CC=C134C135=CC=CC=C135C136=CC=CC=C136C137=CC=CC=C137C138=CC=CC=C138C139=CC=CC=C139C140=CC=CC=C140C141=CC=CC=C141C142=CC=CC=C142C143=CC=CC=C143C144=CC=CC=C144C145=CC=CC=C145C146=CC=CC=C146C147=CC=CC=C147C148=CC=CC=C148C149=CC=CC=C149C150=CC=CC=C150C151=CC=CC=C151C152=CC=CC=C152C153=CC=CC=C153C154=CC=CC=C154C155=CC=CC=C155C156=CC=CC=C156C157=CC=CC=C157C158=CC=CC=C158C159=CC=CC=C159C160=CC=CC=C160C161=CC=CC=C161C162=CC=CC=C162C163=CC=CC=C163C164=CC=CC=C164C165=CC=CC=C165C166=CC=CC=C166C167=CC=CC=C167C168=CC=CC=C168C169=CC=CC=C169C170=CC=CC=C170C171=CC=CC=C171C172=CC=CC=C172C173=CC=CC=C173C174=CC=CC=C174C175=CC=CC=C175C176=CC=CC=C176C177=CC=CC=C177C178=CC=CC=C178C179=CC=CC=C179C180=CC=CC=C180C181=CC=CC=C181C182=CC=CC=C182C183=CC=CC=C183C184=CC=CC=C184C185=CC=CC=C185C186=CC=CC=C186C187=CC=CC=C187C188=CC=CC=C188C189=CC=CC=C189C190=CC=CC=C190C191=CC=CC=C191C192=CC=CC=C192C193=CC=CC=C193C194=CC=CC=C194C195=CC=CC=C195C196=CC=CC=C196C197=CC=CC=C197C198=CC=CC=C198C199=CC=CC=C199C200=CC=CC=C200C201=CC=CC=C201C202=CC=CC=C202C203=CC=CC=C203C204=CC=CC=C204C205=CC=CC=C205C206=CC=CC=C206C207=CC=CC=C207C208=CC=CC=C208C209=CC=CC=C209C210=CC=CC=C210C211=CC=CC=C211C212=CC=CC=C212C213=CC=CC=C213C214=CC=CC=C214C215=CC=CC=C215C216=CC=CC=C216C217=CC=CC=C217C218=CC=CC=C218C219=CC=CC=C219C220=CC=CC=C220C221=CC=CC=C221C222=CC=CC=C222C223=CC=CC=C223C224=CC=CC=C224C225=CC=CC=C225C226=CC=CC=C226C227=CC=CC=C227C228=CC=CC=C228C229=CC=CC=C229C230=CC=CC=C230C231=CC=CC=C231C232=CC=CC=C232C233=CC=CC=C233C234=CC=CC=C234C235=CC=CC=C235C236=CC=CC=C236C237=CC=CC=C237C238=CC=CC=C238C239=CC=CC=C239C240=CC=CC=C240C241=CC=CC=C241C242=CC=CC=C242C243=CC=CC=C243C244=CC=CC=C244C245=CC=CC=C245C246=CC=CC=C246C247=CC=CC=C247C248=CC=CC=C248C249=CC=CC=C249C250=CC=CC=C250C251=CC=CC=C251C252=CC=CC=C252C253=CC=CC=C253C254=CC=CC=C254C255=CC=CC=C255C256=CC=CC=C256C257=CC=CC=C257C258=CC=CC=C258C259=CC=CC=C259C260=CC=CC=C260C261=CC=CC=C261C262=CC=CC=C262C263=CC=CC=C263C264=CC=CC=C264C265=CC=CC=C265C266=CC=CC=C266C267=CC=CC=C267C268=CC=CC=C268C269=CC=CC=C269C270=CC=CC=C270C271=CC=CC=C271C272=CC=CC=C272C273=CC=CC=C273C274=CC=CC=C274C275=CC=CC=C275C276=CC=CC=C276C277=CC=CC=C277C278=CC=CC=C278C279=CC=CC=C279C280=CC=CC=C280C281=CC=CC=C281C282=CC=CC=C282C283=CC=CC=C283C284=CC=CC=C284C285=CC=CC=C285C286=CC=CC=C286C287=CC=CC=C287C288=CC=CC=C288C289=CC=CC=C289C290=CC=CC=C290C291=CC=CC=C291C292=CC=CC=C292C293=CC=CC=C293C294=CC=CC=C294C295=CC=CC=C295C296=CC=CC=C296C297=CC=CC=C297C298=CC=CC=C298C299=CC=CC=C299C300=CC=CC=C300C301=CC=CC=C301C302=CC=CC=C302C303=CC=CC=C303C304=CC=CC=C304C305=CC=CC=C305C306=CC=CC=C306C307=CC=CC=C307C308=CC=CC=C308C309=CC=CC=C309C310=CC=CC=C310C311=CC=CC=C311C312=CC=CC=C312C313=CC=CC=C313C314=CC=CC=C314C315=CC=CC=C315C316=CC=CC=C316C317=CC=CC=C317C318=CC=CC=C318C319=CC=CC=C319C320=CC=CC=C320C321=CC=CC=C321C322=CC=CC=C322C323=CC=CC=C323C324=CC=CC=C324C325=CC=CC=C325C326=CC=CC=C326C327=CC=CC=C327C328=CC=CC=C328C329=CC=CC=C329C330=CC=CC=C330C331=CC=CC=C331C332=CC=CC=C332C333=CC=CC=C333C334=CC=CC=C334C335=CC=CC=C335C336=CC=CC=C336C337=CC=CC=C337C338=CC=CC=C338C339=CC=CC=C339C340=CC=CC=C340C341=CC=CC=C341C342=CC=CC=C342C343=CC=CC=C343C344=CC=CC=C344C345=CC=CC=C345C346=CC=CC=C346C347=CC=CC=C347C348=CC=CC=C348C349=CC=CC=C349C350=CC=CC=C350C351=CC=CC=C351C352=CC=CC=C352C353=CC=CC=C353C354=CC=CC=C354C355=CC=CC=C355C356=CC=CC=C356C357=CC=CC=C357C358=CC=CC=C358C359=CC=CC

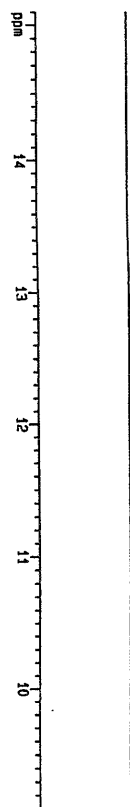[illegible]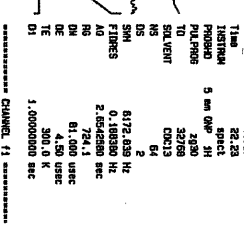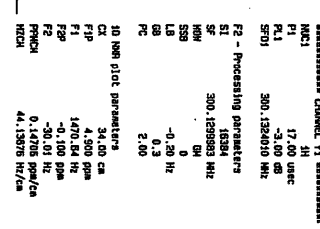

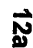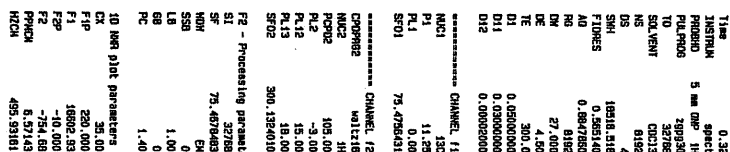

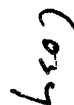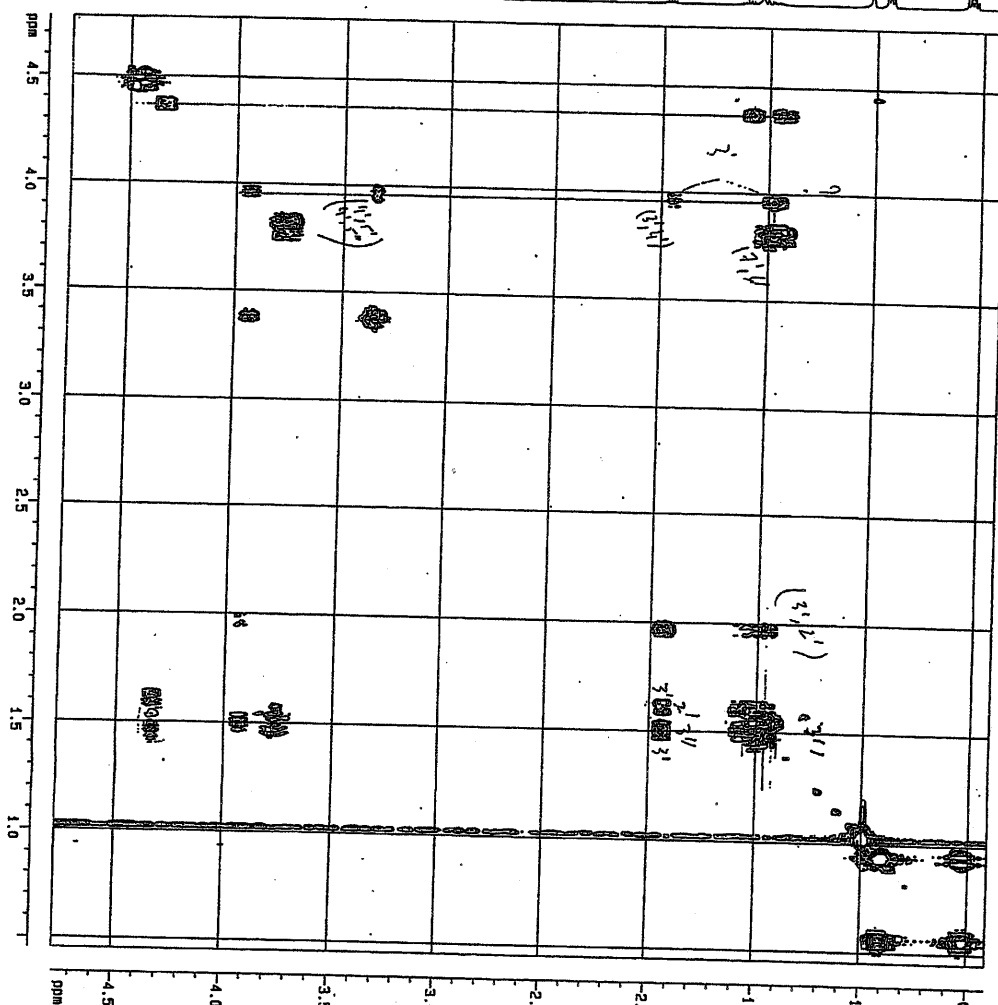

| JANUARY |    | FEBRUARY |    | MARCH |    | APRIL |    | MAY |    | JUNE |    | JULY |    | AUGUST |    | SEPTEMBER |    | OCTOBER |    | NOVEMBER |    | DECEMBER |    |
|---------|----|----------|----|-------|----|-------|----|-----|----|------|----|------|----|--------|----|-----------|----|---------|----|----------|----|----------|----|
| 1       | 2  | 3        | 4  | 5     | 6  | 7     | 8  | 9   | 10 | 11   | 12 | 13   | 14 | 15     | 16 | 17        | 18 | 19      | 20 | 21       | 22 | 23       | 24 |
| 25      | 26 | 27       | 28 | 29    | 30 | 31    | 1  | 2   | 3  | 4    | 5  | 6    | 7  | 8      | 9  | 10        | 11 | 12      | 13 | 14       | 15 | 16       |    |
| 17      | 18 | 19       | 20 | 21    | 22 | 23    | 24 | 25  | 26 | 27   | 28 | 29   | 30 | 31     | 1  | 2         | 3  | 4       | 5  | 6        | 7  | 8        |    |
| 9       | 10 | 11       | 12 | 13    | 14 | 15    | 16 | 17  | 18 | 19   | 20 | 21   | 22 | 23     | 24 | 25        | 26 | 27      | 28 | 29       | 30 | 31       |    |
| 32      | 33 | 34       | 35 | 36    | 37 | 38    | 39 | 40  | 41 | 42   | 43 | 44   | 45 | 46     | 47 | 48        | 49 | 50      | 51 | 52       | 53 | 54       |    |

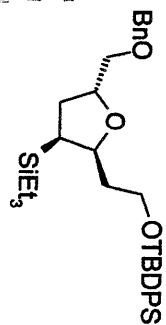

12b

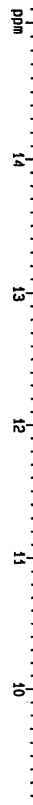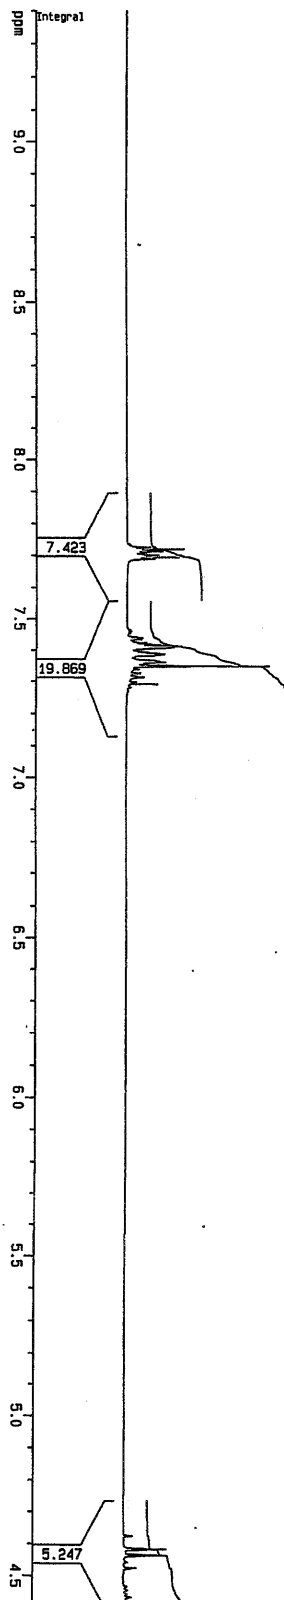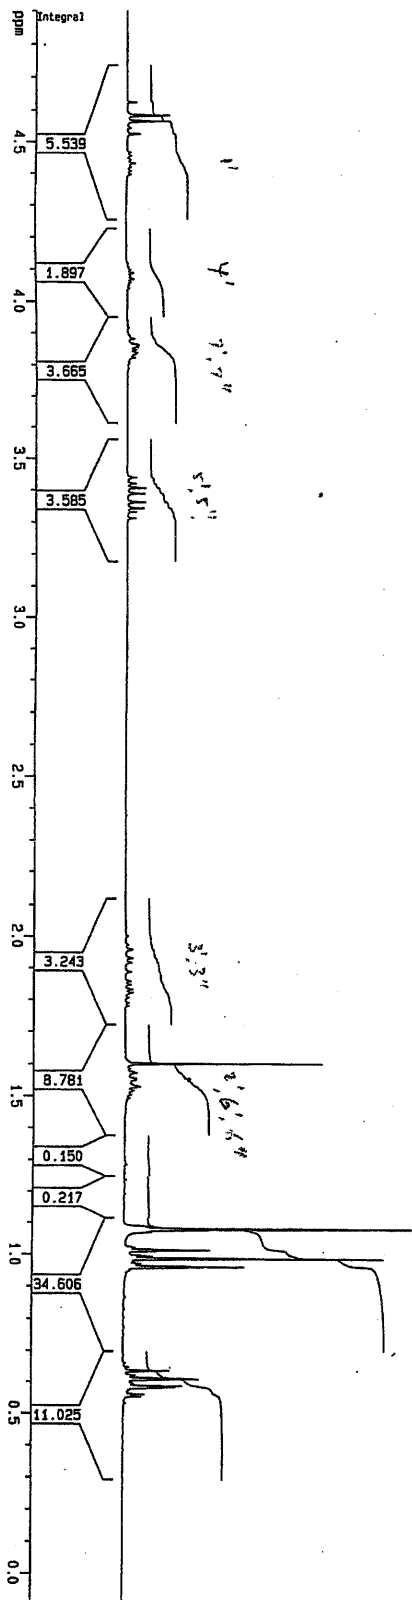

Time 10.07  
INSTRUM spect  
PROBHD 5 mm QNP 5H  
PULPROG zgpg30  
TD 65536  
SOLVENT CDCl3  
NS 0  
DS 2  
SWH 6172.639 Hz  
AQ 0.188390 Hz  
RG 1310  
FIDRES 2.1642500 Hz  
DE 19.450 Hz  
TE 300.0 K  
D1 1.00000000 sec

===== CHANNEL f1 =====  
NUC1 1H  
P1 17.00 usec  
PL1 -3.00 dB  
SFO1 300.135010 MHz

F2 - Processing parameters  
SI 32768  
SF 300.135010 MHz  
WDW EM  
SSB 0  
LB 0.20 Hz  
GB 0  
PC 2.00

10 MHz plot parameters  
CX 34.00 cm  
F1 4.000 ppm  
F2 1470.64 Hz  
F3 -0.100 ppm  
F4 -50.01 Hz  
PRNUCH 44.13070 Hz/cm

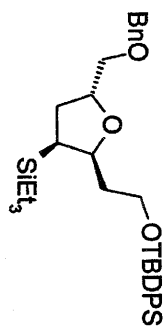

Du: USRChem12, NAME: 12b, EXPNO: 11, PROCNO: 1  
 F1=236.713ppm, F2=8.882ppm, MI=0.00cm, MAXI=10000.00cm, PC=1.500

| #  | ADDRESS | [Hz]      | [ppm]    | INTENSITY |
|----|---------|-----------|----------|-----------|
| 1  | 11665.1 | 10524.271 | 139.4040 | 1.43      |
| 2  | 12240.1 | 10312.361 | 136.461  | 8.61      |
| 3  | 12423.9 | 10202.821 | 135.1946 | 1.12      |
| 4  | 12448.8 | 10194.430 | 135.0864 | 1.04      |
| 5  | 13061.3 | 9846.287  | 130.4968 | 3.81      |
| 6  | 13064.8 | 9846.305  | 130.4706 | 4.25      |
| 7  | 13218.7 | 9750.433  | 129.3368 | 6.71      |
| 8  | 13301.0 | 9712.782  | 128.7012 | 6.03      |
| 9  | 13318.8 | 9702.718  | 128.5879 | 11.22     |
| 10 | 13322.5 | 9700.423  | 128.5375 | 5.46      |
| 11 | 13814.0 | 8032.019  | 79.4915  | 3.10      |
| 12 | 15011.3 | 5920.555  | 78.4315  | 18.02     |
| 13 | 20067.9 | 5888.576  | 78.0278  | 18.50     |
| 14 | 20124.3 | 5858.665  | 77.8049  | 18.16     |
| 15 | 20309.3 | 5752.137  | 76.2199  | 3.31      |
| 16 | 20564.3 | 5608.014  | 74.3101  | 3.28      |
| 17 | 20604.5 | 5585.281  | 74.0089  | 2.94      |
| 18 | 22114.3 | 4732.020  | 62.7026  | 2.71      |
| 19 | 25462.9 | 2839.608  | 37.6589  | 2.21      |
| 20 | 25938.2 | 2333.543  | 30.8204  | 2.70      |
| 21 | 26363.9 | 2177.950  | 29.8981  | 3.17      |
| 22 | 26763.5 | 2104.577  | 27.8871  | 9.46      |
| 23 | 27794.0 | 1522.222  | 20.1705  | 2.21      |
| 24 | 28316.9 | 1361.584  | 18.7665  | 7.91      |
| 25 | 29860.0 | 354.823   | 4.8990   | 9.04      |

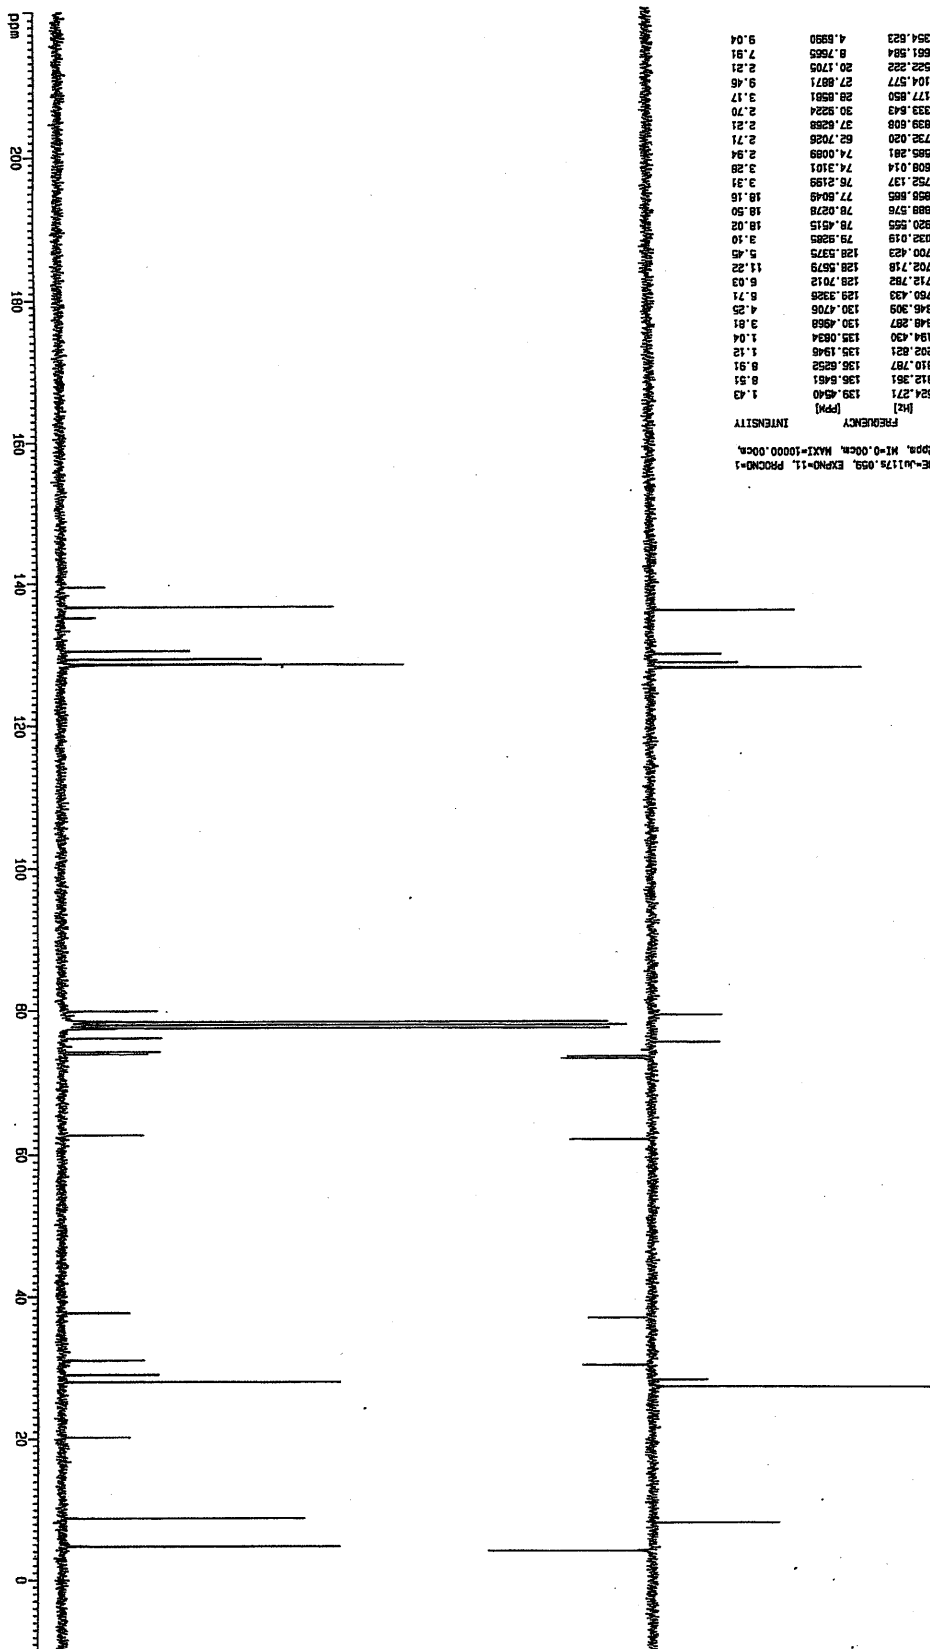

|         |             |            |     |
|---------|-------------|------------|-----|
| Time    | 11.25       | 15.47      | 12b |
| INSTRUM | 5 mm QNP-1H | 1H         | 12b |
| PROBHD  | 5 mm QNP-1H | 1H         | 12b |
| TD      | 32768       | 32768      | 12b |
| SOLVENT | CDCl3       | CDCl3      | 12b |
| NS      | 8182        | 8182       | 12b |
| DS      | 4           | 4          | 12b |
| SWH     | 16318.318   | 16318.318  | 12b |
| FIDRES  | 0.055148    | 0.055148   | 12b |
| AQ      | 0.0847680   | 0.0847680  | 12b |
| RG      | 27.000      | 27.000     | 12b |
| DE      | 4.50        | 4.50       | 12b |
| TE      | 300.0       | 300.0      | 12b |
| O1      | 0.05900000  | 0.05900000 | 12b |
| O13     | 0.03000000  | 0.03000000 | 12b |
| O12     | 0.00020000  | 0.00020000 | 12b |

\*\*\*\*\* CHANNEL 11 \*\*\*\*\*

|     |            |     |
|-----|------------|-----|
| P1  | 11.25      | ppm |
| P2  | 11.25      | ppm |
| SF1 | 75.0796431 | ppm |

\*\*\*\*\* CHANNEL 12 \*\*\*\*\*

|      |       |      |
|------|-------|------|
| NAME | VALUE | UNIT |
| CH1  | 10.00 | ppm  |
| CH2  | 35.00 | ppm  |
| CH3  | -3.00 | ppm  |
| CH4  | -3.00 | ppm  |
| CH5  | 15.00 | ppm  |
| CH6  | 15.00 | ppm  |
| CH7  | 30.0  | ppm  |
| CH8  | 30.0  | ppm  |

\*\*\*\*\* CHANNEL 13 \*\*\*\*\*

|      |       |      |
|------|-------|------|
| NAME | VALUE | UNIT |
| CH1  | 10.00 | ppm  |
| CH2  | 35.00 | ppm  |
| CH3  | -3.00 | ppm  |
| CH4  | -3.00 | ppm  |
| CH5  | 15.00 | ppm  |
| CH6  | 15.00 | ppm  |
| CH7  | 30.0  | ppm  |
| CH8  | 30.0  | ppm  |

\*\*\*\*\* CHANNEL 14 \*\*\*\*\*

|      |       |      |
|------|-------|------|
| NAME | VALUE | UNIT |
| CH1  | 10.00 | ppm  |
| CH2  | 35.00 | ppm  |
| CH3  | -3.00 | ppm  |
| CH4  | -3.00 | ppm  |
| CH5  | 15.00 | ppm  |
| CH6  | 15.00 | ppm  |
| CH7  | 30.0  | ppm  |
| CH8  | 30.0  | ppm  |

\*\*\*\*\* CHANNEL 15 \*\*\*\*\*

|      |       |      |
|------|-------|------|
| NAME | VALUE | UNIT |
| CH1  | 10.00 | ppm  |
| CH2  | 35.00 | ppm  |
| CH3  | -3.00 | ppm  |
| CH4  | -3.00 | ppm  |
| CH5  | 15.00 | ppm  |
| CH6  | 15.00 | ppm  |
| CH7  | 30.0  | ppm  |
| CH8  | 30.0  | ppm  |

\*\*\*\*\* CHANNEL 16 \*\*\*\*\*

|      |       |      |
|------|-------|------|
| NAME | VALUE | UNIT |
| CH1  | 10.00 | ppm  |
| CH2  | 35.00 | ppm  |
| CH3  | -3.00 | ppm  |
| CH4  | -3.00 | ppm  |
| CH5  | 15.00 | ppm  |
| CH6  | 15.00 | ppm  |
| CH7  | 30.0  | ppm  |
| CH8  | 30.0  | ppm  |

\*\*\*\*\* CHANNEL 17 \*\*\*\*\*

|      |       |      |
|------|-------|------|
| NAME | VALUE | UNIT |
| CH1  | 10.00 | ppm  |
| CH2  | 35.00 | ppm  |
| CH3  | -3.00 | ppm  |
| CH4  | -3.00 | ppm  |
| CH5  | 15.00 | ppm  |
| CH6  | 15.00 | ppm  |
| CH7  | 30.0  | ppm  |
| CH8  | 30.0  | ppm  |

\*\*\*\*\* CHANNEL 18 \*\*\*\*\*

|      |       |      |
|------|-------|------|
| NAME | VALUE | UNIT |
| CH1  | 10.00 | ppm  |
| CH2  | 35.00 | ppm  |
| CH3  | -3.00 | ppm  |
| CH4  | -3.00 | ppm  |
| CH5  | 15.00 | ppm  |
| CH6  | 15.00 | ppm  |
| CH7  | 30.0  | ppm  |
| CH8  | 30.0  | ppm  |

\*\*\*\*\* CHANNEL 19 \*\*\*\*\*

|      |       |      |
|------|-------|------|
| NAME | VALUE | UNIT |
| CH1  | 10.00 | ppm  |
| CH2  | 35.00 | ppm  |
| CH3  | -3.00 | ppm  |
| CH4  | -3.00 | ppm  |
| CH5  | 15.00 | ppm  |
| CH6  | 15.00 | ppm  |
| CH7  | 30.0  | ppm  |
| CH8  | 30.0  | ppm  |

\*\*\*\*\* CHANNEL 20 \*\*\*\*\*

|      |       |      |
|------|-------|------|
| NAME | VALUE | UNIT |
| CH1  | 10.00 | ppm  |
| CH2  | 35.00 | ppm  |
| CH3  | -3.00 | ppm  |
| CH4  | -3.00 | ppm  |
| CH5  | 15.00 | ppm  |
| CH6  | 15.00 | ppm  |
| CH7  | 30.0  | ppm  |
| CH8  | 30.0  | ppm  |

\*\*\*\*\* CHANNEL 21 \*\*\*\*\*

|      |       |      |
|------|-------|------|
| NAME | VALUE | UNIT |
| CH1  | 10.00 | ppm  |
| CH2  | 35.00 | ppm  |
| CH3  | -3.00 | ppm  |
| CH4  | -3.00 | ppm  |
| CH5  | 15.00 | ppm  |
| CH6  | 15.00 | ppm  |
| CH7  | 30.0  | ppm  |
| CH8  | 30.0  | ppm  |

\*\*\*\*\* CHANNEL 22 \*\*\*\*\*

|      |       |      |
|------|-------|------|
| NAME | VALUE | UNIT |
| CH1  | 10.00 | ppm  |
| CH2  | 35.00 | ppm  |
| CH3  | -3.00 | ppm  |
| CH4  | -3.00 | ppm  |
| CH5  | 15.00 | ppm  |
| CH6  | 15.00 | ppm  |
| CH7  | 30.0  | ppm  |
| CH8  | 30.0  | ppm  |

\*\*\*\*\* CHANNEL 23 \*\*\*\*\*

|      |       |      |
|------|-------|------|
| NAME | VALUE | UNIT |
| CH1  | 10.00 | ppm  |
| CH2  | 35.00 | ppm  |
| CH3  | -3.00 | ppm  |
| CH4  | -3.00 | ppm  |
| CH5  | 15.00 | ppm  |
| CH6  | 15.00 | ppm  |
| CH7  | 30.0  | ppm  |
| CH8  | 30.0  | ppm  |

\*\*\*\*\* CHANNEL 24 \*\*\*\*\*

|      |       |      |
|------|-------|------|
| NAME | VALUE | UNIT |
| CH1  | 10.00 | ppm  |
| CH2  | 35.00 | ppm  |
| CH3  | -3.00 | ppm  |
| CH4  | -3.00 | ppm  |
| CH5  | 15.00 | ppm  |
| CH6  | 15.00 | ppm  |
| CH7  | 30.0  | ppm  |
| CH8  | 30.0  | ppm  |

\*\*\*\*\* CHANNEL 25 \*\*\*\*\*

|      |       |      |
|------|-------|------|
| NAME | VALUE | UNIT |
| CH1  | 10.00 | ppm  |
| CH2  | 35.00 | ppm  |
| CH3  | -3.00 | ppm  |
| CH4  | -3.00 | ppm  |
| CH5  | 15.00 | ppm  |
| CH6  | 15.00 | ppm  |
| CH7  | 30.0  | ppm  |
| CH8  | 30.0  | ppm  |

\*\*\*\*\* CHANNEL 26 \*\*\*\*\*

|      |       |      |
|------|-------|------|
| NAME | VALUE | UNIT |
| CH1  | 10.00 | ppm  |
| CH2  | 35.00 | ppm  |
| CH3  | -3.00 | ppm  |
| CH4  | -3.00 | ppm  |
| CH5  | 15.00 | ppm  |
| CH6  | 15.00 | ppm  |
| CH7  | 30.0  | ppm  |
| CH8  | 30.0  | ppm  |

\*\*\*\*\* CHANNEL 27 \*\*\*\*\*

|      |       |      |
|------|-------|------|
| NAME | VALUE | UNIT |
| CH1  | 10.00 | ppm  |
| CH2  | 35.00 | ppm  |
| CH3  | -3.00 | ppm  |
| CH4  | -3.00 | ppm  |
| CH5  | 15.00 | ppm  |
| CH6  | 15.00 | ppm  |
| CH7  | 30.0  | ppm  |
| CH8  | 30.0  | ppm  |

\*\*\*\*\* CHANNEL 28 \*\*\*\*\*

|      |       |      |
|------|-------|------|
| NAME | VALUE | UNIT |
| CH1  | 10.00 | ppm  |
| CH2  | 35.00 | ppm  |
| CH3  | -3.00 | ppm  |
| CH4  | -3.00 | ppm  |
| CH5  | 15.00 | ppm  |
| CH6  | 15.00 | ppm  |
| CH7  | 30.0  | ppm  |
| CH8  | 30.0  | ppm  |

\*\*\*\*\* CHANNEL 29 \*\*\*\*\*

|      |       |      |
|------|-------|------|
| NAME | VALUE | UNIT |
| CH1  | 10.00 | ppm  |
| CH2  | 35.00 | ppm  |
| CH3  | -3.00 | ppm  |
| CH4  | -3.00 | ppm  |
| CH5  | 15.00 | ppm  |
| CH6  | 15.00 | ppm  |
| CH7  | 30.0  | ppm  |
| CH8  | 30.0  | ppm  |

\*\*\*\*\* CHANNEL 30 \*\*\*\*\*

|      |       |      |
|------|-------|------|
| NAME | VALUE | UNIT |
| CH1  | 10.00 | ppm  |
| CH2  | 35.00 | ppm  |
| CH3  | -3.00 | ppm  |
| CH4  | -3.00 | ppm  |
| CH5  | 15.00 | ppm  |
| CH6  | 15.00 | ppm  |
| CH7  | 30.0  | ppm  |
| CH8  | 30.0  | ppm  |

\*\*\*\*\* CHANNEL 31 \*\*\*\*\*

|      |       |      |
|------|-------|------|
| NAME | VALUE | UNIT |
| CH1  | 10.00 | ppm  |
| CH2  | 35.00 | ppm  |
| CH3  | -3.00 | ppm  |
| CH4  | -3.00 | ppm  |
| CH5  | 15.00 | ppm  |
| CH6  | 15.00 | ppm  |
| CH7  | 30.0  | ppm  |
| CH8  | 30.0  | ppm  |

\*\*\*\*\* CHANNEL 32 \*\*\*\*\*

|      |       |      |
|------|-------|------|
| NAME | VALUE | UNIT |
| CH1  | 10.00 | ppm  |
| CH2  | 35.00 | ppm  |
| CH3  | -3.00 | ppm  |
| CH4  | -3.00 | ppm  |
| CH5  | 15.00 | ppm  |
| CH6  | 15.00 | ppm  |
| CH7  | 30.0  | ppm  |
| CH8  | 30.0  | ppm  |

\*\*\*\*\* CHANNEL 33 \*\*\*\*\*

|      |       |      |
|------|-------|------|
| NAME | VALUE | UNIT |
| CH1  | 10.00 | ppm  |
| CH2  | 35.00 | ppm  |
| CH3  | -3.00 | ppm  |
| CH4  | -3.00 | ppm  |
| CH5  | 15.00 | ppm  |
| CH6  | 15.00 | ppm  |
| CH7  | 30.0  | ppm  |
| CH8  | 30.0  | ppm  |

\*\*\*\*\* CHANNEL 34 \*\*\*\*\*

|      |       |      |
|------|-------|------|
| NAME | VALUE | UNIT |
| CH1  | 10.00 | ppm  |
| CH2  | 35.00 | ppm  |
| CH3  | -3.00 | ppm  |
| CH4  | -3.00 | ppm  |
| CH5  | 15.00 | ppm  |
| CH6  | 15.00 | ppm  |
| CH7  | 30.0  | ppm  |
| CH8  | 30.0  | ppm  |

\*\*\*\*\* CHANNEL 35 \*\*\*\*\*

|      |       |      |
|------|-------|------|
| NAME | VALUE | UNIT |
| CH1  | 10.00 | ppm  |
| CH2  | 35.00 | ppm  |
| CH3  | -3.00 | ppm  |
| CH4  | -3.00 | ppm  |
| CH5  | 15.00 | ppm  |
| CH6  | 15.00 | ppm  |
| CH7  | 30.0  | ppm  |
| CH8  | 30.0  | ppm  |

\*\*\*\*\* CHANNEL 36 \*\*\*\*\*

|      |       |      |
|------|-------|------|
| NAME | VALUE | UNIT |
| CH1  | 10.00 | ppm  |
| CH2  | 35.00 | ppm  |
| CH3  | -3.00 | ppm  |
| CH4  | -3.00 | ppm  |
| CH5  | 15.00 | ppm  |
| CH6  | 15.00 | ppm  |
| CH7  | 30.0  | ppm  |
| CH8  | 30.0  | ppm  |

\*\*\*\*\* CHANNEL 37 \*\*\*\*\*

|      |       |      |
|------|-------|------|
| NAME | VALUE | UNIT |
| CH1  | 10.00 | ppm  |
| CH2  | 35.00 | ppm  |
| CH3  | -3.00 | ppm  |
| CH4  | -3.00 | ppm  |
| CH5  | 15.00 | ppm  |
| CH6  | 15.00 | ppm  |
| CH7  | 30.0  | ppm  |
| CH8  | 30.0  | ppm  |

\*\*\*\*\* CHANNEL 38 \*\*\*\*\*

|      |       |      |
|------|-------|------|
| NAME | VALUE | UNIT |
| CH1  | 10.00 | ppm  |
| CH2  | 35.00 | ppm  |
| CH3  | -3.00 | ppm  |
| CH4  | -3.00 | ppm  |
| CH5  | 15.00 | ppm  |
| CH6  | 15.00 | ppm  |
| CH7  | 30.0  | ppm  |
| CH8  | 30.0  | ppm  |

\*\*\*\*\* CHANNEL 39 \*\*\*\*\*

|      |       |      |
|------|-------|------|
| NAME | VALUE | UNIT |
| CH1  | 10.00 | ppm  |
| CH2  | 35.00 | ppm  |
| CH3  | -3.00 | ppm  |
| CH4  | -3.00 | ppm  |
| CH5  | 15.00 | ppm  |
| CH6  | 15.00 | ppm  |
| CH7  | 30.0  | ppm  |
| CH8  | 30.0  | ppm  |

\*\*\*\*\* CHANNEL 40 \*\*\*\*\*

|      |       |      |
|------|-------|------|
| NAME | VALUE | UNIT |
| CH1  | 10.00 | ppm  |
| CH2  | 35.00 | ppm  |
| CH3  | -3.00 | ppm  |
| CH4  | -3.00 | ppm  |
| CH5  | 15.00 | ppm  |
| CH6  | 15.00 | ppm  |
| CH7  | 30.0  | ppm  |
| CH8  | 30.0  | ppm  |

\*\*\*\*\* CHANNEL 41 \*\*\*\*\*

|      |       |      |
|------|-------|------|
| NAME | VALUE | UNIT |
| CH1  | 10.00 | ppm  |
| CH2  | 35.00 | ppm  |
| CH3  | -3.00 | ppm  |
| CH4  | -3.00 | ppm  |
| CH5  | 15.00 | ppm  |
| CH6  | 15.00 | ppm  |
| CH7  | 30.0  | ppm  |
| CH8  | 30.0  | ppm  |

\*\*\*\*\* CHANNEL 42 \*\*\*\*\*

|      |       |      |
|------|-------|------|
| NAME | VALUE | UNIT |
| CH1  | 10.00 | ppm  |
| CH2  | 35.00 | ppm  |
| CH3  | -3.00 | ppm  |
| CH4  | -3.00 | ppm  |
| CH5  | 15.00 | ppm  |
| CH6  | 15.00 | ppm  |
| CH7  | 30.0  | ppm  |
| CH8  | 30.0  | ppm  |

\*\*\*\*\* CHANNEL 43 \*\*\*\*\*

|      |       |      |
|------|-------|------|
| NAME | VALUE | UNIT |
| CH1  | 10.00 | ppm  |
| CH2  | 35.00 | ppm  |
| CH3  | -3.00 | ppm  |
| CH4  | -3.00 | ppm  |
| CH5  | 15.00 | ppm  |
| CH6  | 15.00 | ppm  |
| CH7  | 30.0  | ppm  |
| CH8  | 30.0  | ppm  |

\*\*\*\*\* CHANNEL 44 \*\*\*\*\*

|      |       |      |
|------|-------|------|
| NAME | VALUE | UNIT |
| CH1  | 10.00 | ppm  |
| CH2  | 35.00 | ppm  |
| CH3  | -3.00 | ppm  |
| CH4  | -3.00 | ppm  |
| CH5  | 15.00 | ppm  |
| CH6  | 15.00 | ppm  |
| CH7  | 30.0  | ppm  |
| CH8  | 30.0  | ppm  |

\*\*\*\*\* CHANNEL 45 \*\*\*\*\*

|      |       |      |
|------|-------|------|
| NAME | VALUE | UNIT |
| CH1  | 10.00 | ppm  |
| CH2  | 35.00 | ppm  |
| CH3  | -3.00 | ppm  |
| CH4  | -3.00 | ppm  |
| CH5  | 15.00 | ppm  |
| CH6  | 15.00 | ppm  |
| CH7  | 30.0  | ppm  |
| CH8  | 30.0  | ppm  |

\*\*\*\*\* CHANNEL 46 \*\*\*\*\*

|      |       |      |
|------|-------|------|
| NAME | VALUE | UNIT |
| CH1  | 10.00 | ppm  |
| CH2  | 35.00 | ppm  |
| CH3  | -3.00 | ppm  |
| CH4  | -3.00 | ppm  |
| CH5  | 15.00 | ppm  |
| CH6  | 15.00 | ppm  |
| CH7  | 30.0  | ppm  |
| CH8  | 30.0  | ppm  |

\*\*\*\*\* CHANNEL 47 \*\*\*\*\*

|      |       |      |
|------|-------|------|
| NAME | VALUE | UNIT |
| CH1  | 10.00 | ppm  |
| CH2  | 35.00 | ppm  |
| CH3  | -3.00 | ppm  |
| CH4  | -3.00 | ppm  |
| CH5  | 15.00 | ppm  |
| CH6  | 15.00 | ppm  |
| CH7  | 30.0  | ppm  |
| CH8  | 30.0  | ppm  |

\*\*\*\*\* CHANNEL 48 \*\*\*\*\*

|      |       |      |
|------|-------|------|
| NAME | VALUE | UNIT |
| CH1  | 10.00 | ppm  |
| CH2  | 35.00 | ppm  |
| CH3  | -3.00 | ppm  |
| CH4  | -3.00 | ppm  |
| CH5  | 15.00 | ppm  |
| CH6  | 15.00 | ppm  |
| CH7  | 30.0  | ppm  |
| CH8  | 30.0  | ppm  |

\*\*\*\*\* CHANNEL 49 \*\*\*\*\*

|      |       |      |
|------|-------|------|
| NAME | VALUE | UNIT |
| CH1  | 10.00 | ppm  |
| CH2  | 35.00 | ppm  |
| CH3  | -3.00 | ppm  |
| CH4  | -3.00 | ppm  |
| CH5  | 15.00 | ppm  |
| CH6  | 15.00 | ppm  |
| CH7  | 30.0  | ppm  |
| CH8  | 30.0  | ppm  |

\*\*\*\*\* CHANNEL 50 \*\*\*\*\*

|      |       |      |
|------|-------|------|
| NAME | VALUE | UNIT |
| CH1  | 10.00 | ppm  |
| CH2  | 35.00 | ppm  |
| CH3  | -3.00 | ppm  |
| CH4  | -3.00 | ppm  |
| CH5  | 15.00 | ppm  |
| CH6  | 15.00 | ppm  |
| CH7  | 30.0  | ppm  |
| CH8  | 30.0  | ppm  |

\*\*\*\*\* CHANNEL 51 \*\*\*\*\*

|      |       |      |
|------|-------|------|
| NAME | VALUE | UNIT |
| CH1  | 10.00 | ppm  |
| CH2  | 35.00 | ppm  |
| CH3  | -3.00 | ppm  |
| CH4  | -3.00 | ppm  |
| CH5  | 15.00 | ppm  |
| CH6  | 15.00 | ppm  |
| CH7  | 30.0  | ppm  |
| CH8  | 30.0  | ppm  |

\*\*\*\*\* CHANNEL 52 \*\*\*\*\*

|      |       |      |
|------|-------|------|
| NAME | VALUE | UNIT |
| CH1  | 10.00 | ppm  |
| CH2  | 35.00 | ppm  |
| CH3  | -3.00 | ppm  |
| CH4  | -3.00 | ppm  |
| CH5  | 15.00 | ppm  |
| CH6  | 15.00 | ppm  |
| CH7  | 30.0  | ppm  |
| CH8  | 30.0  | ppm  |

\*\*\*\*\* CHANNEL 53 \*\*\*\*\*

|      |       |      |
|------|-------|------|
| NAME | VALUE | UNIT |
| CH1  | 10.00 | ppm  |
| CH2  | 35.00 | ppm  |
| CH3  | -3.00 | ppm  |
| CH4  | -3.00 | ppm  |
| CH5  | 15.00 | ppm  |
| CH6  | 15.00 | ppm  |
| CH7  | 30.0  | ppm  |
| CH8  | 30.0  | ppm  |

\*\*\*\*\* CHANNEL 54 \*\*\*\*\*

|      |       |      |
|------|-------|------|
| NAME | VALUE | UNIT |
| CH1  | 10.00 | ppm  |
| CH2  | 35.00 | ppm  |
| CH3  | -3.00 | ppm  |
| CH4  | -3.00 | ppm  |
| CH5  | 15.00 | ppm  |
| CH6  | 15.00 | ppm  |
| CH7  | 30.0  | ppm  |
| CH8  | 30.0  | ppm  |

\*\*\*\*\* CHANNEL 55 \*\*\*\*\*

|      |       |      |
|------|-------|------|
| NAME | VALUE | UNIT |
| CH1  | 10.00 | ppm  |
| CH2  | 35.00 | ppm  |
| CH3  | -3.00 | ppm  |
| CH4  | -3.00 | ppm  |
| CH5  | 15.00 | ppm  |
| CH6  | 15.00 | ppm  |
| CH7  | 30.0  | ppm  |
| CH8  | 30.0  | ppm  |

\*\*\*\*\* CHANNEL 56 \*\*\*\*\*

|      |       |      |
|------|-------|------|
| NAME | VALUE | UNIT |
| CH1  | 10.00 | ppm  |
| CH2  | 35.00 | ppm  |
| CH3  | -3.00 | ppm  |
| CH4  | -3.00 | ppm  |
| CH5  | 15.00 | ppm  |
| CH6  | 15.00 | ppm  |
| CH7  | 30.0  | ppm  |
| CH8  | 30.0  | ppm  |

\*\*\*\*\* CHANNEL 57 \*\*\*\*\*

|      |       |      |
|------|-------|------|
| NAME | VALUE | UNIT |
| CH1  | 10.00 | ppm  |

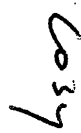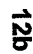23





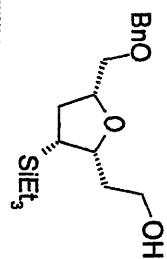

13a

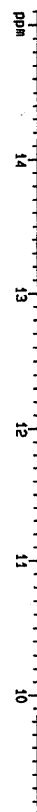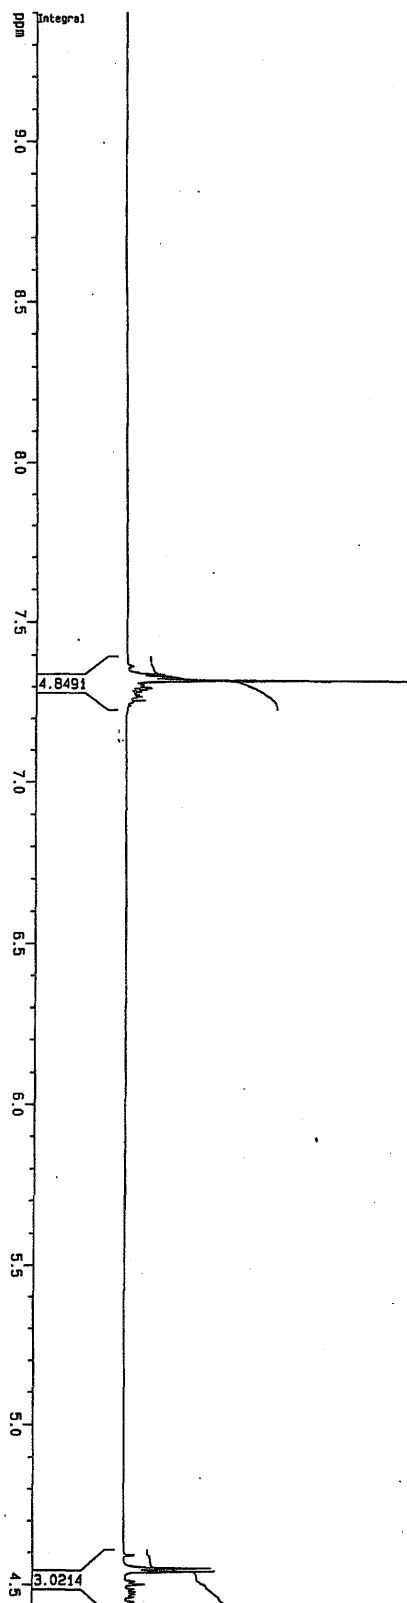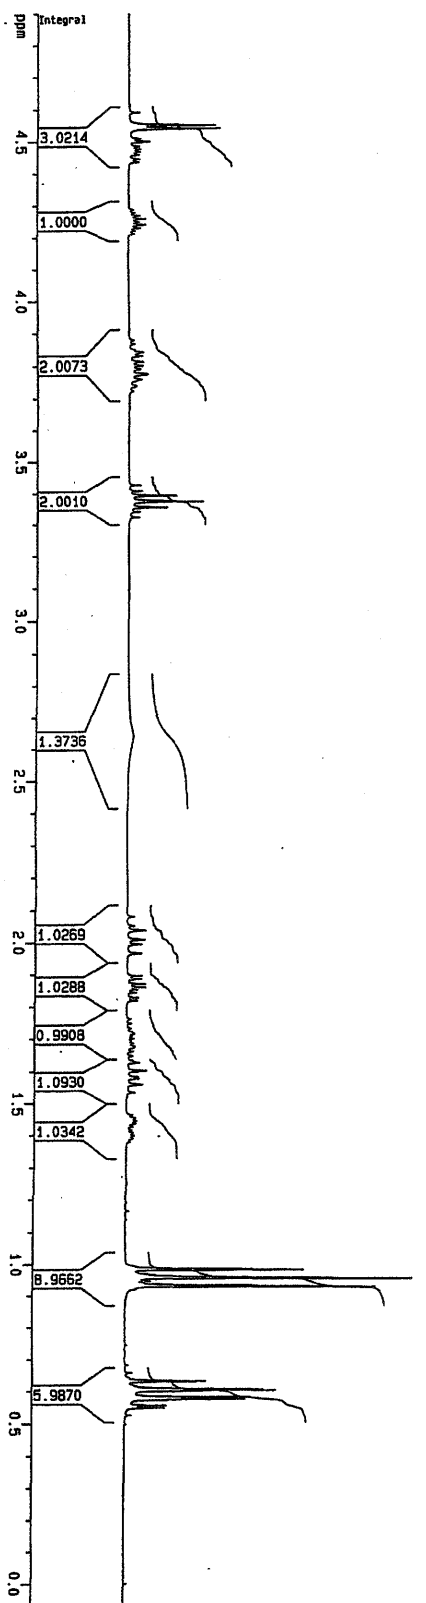

Time 10.04  
INSTRUM spect  
PROBHD 5 mm QNP 1H  
PULPROG zgpg30  
TO 1330  
SOLVENT CDCl3  
NS 16  
DS 2  
SWH 6172.893 Hz  
AQ 0.168890 sec  
RG 256  
DM 81.060 MHz  
TE 300.2 K  
D1 1.0000000 sec

NAME CHANNEL F1  
NUC1 13C  
P1 17.00 sec  
PL1 -3.00 dB  
SFO1 300.1350610 MHz

F2 - Processing parameters  
SI 32768  
SF 300.1350610 MHz  
WDW EM  
SSB 0  
LB 0.00 Hz  
GB 0  
PC 4.00

ID NMR file parameters  
CX 34.00 cm  
F1P 4.500 ppm  
F1 1470.84 Hz  
F2P -0.100 ppm  
F2 -30.01 Hz  
FREQM 101.626 MHz  
NORM 41.15018 Hz/cm

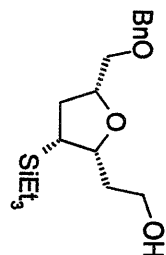

13a

| #  | ADDRESS | FREQUENCY [Hz] | INTENSITY |
|----|---------|----------------|-----------|
| 1  | 11887.3 | 10388.104      | 137.6455  |
| 2  | 12211.5 | 9639.708       | 127.7327  |
| 3  | 13068.7 | 9904.808       | 127.0553  |
| 4  | 13313.2 | 9982.275       | 156.9717  |
| 5  | 19192.8 | 82.9420        | 6.92      |
| 6  | 20010.2 | 5757.481       | 76.8207   |
| 7  | 20066.8 | 5765.521       | 76.9371   |
| 8  | 20123.3 | 5773.562       | 76.9739   |
| 9  | 20231.1 | 5672.658       | 75.1666   |
| 10 | 20559.3 | 5487.197       | 72.7091   |
| 11 | 20559.0 | 5443.851       | 72.1349   |
| 12 | 22018.7 | 4563.401       | 51.7900   |
| 13 | 22643.5 | 2813.911       | 29.2796   |
| 14 | 22658.8 | 2209.667       | 27.6914   |
| 15 | 22670.9 | 2089.810       | 27.6914   |
| 16 | 22922.4 | 934.806        | 7.0866    |
| 17 | 22910.8 | 258.761        | 3.0880    |
| 18 | 22956.4 | 233.042        | 3.0880    |
| 19 | 25902.7 | 2.7413         | 0.45      |

DU=V, USR=Chem131, NAME=J1215.065, EXPNO=11, PROCNO=1  
F1=226.713ppm, F2=-8.882ppm, M1=0.00cm, M2=0.00cm, MAXI=1000.00cm, PC=1.500

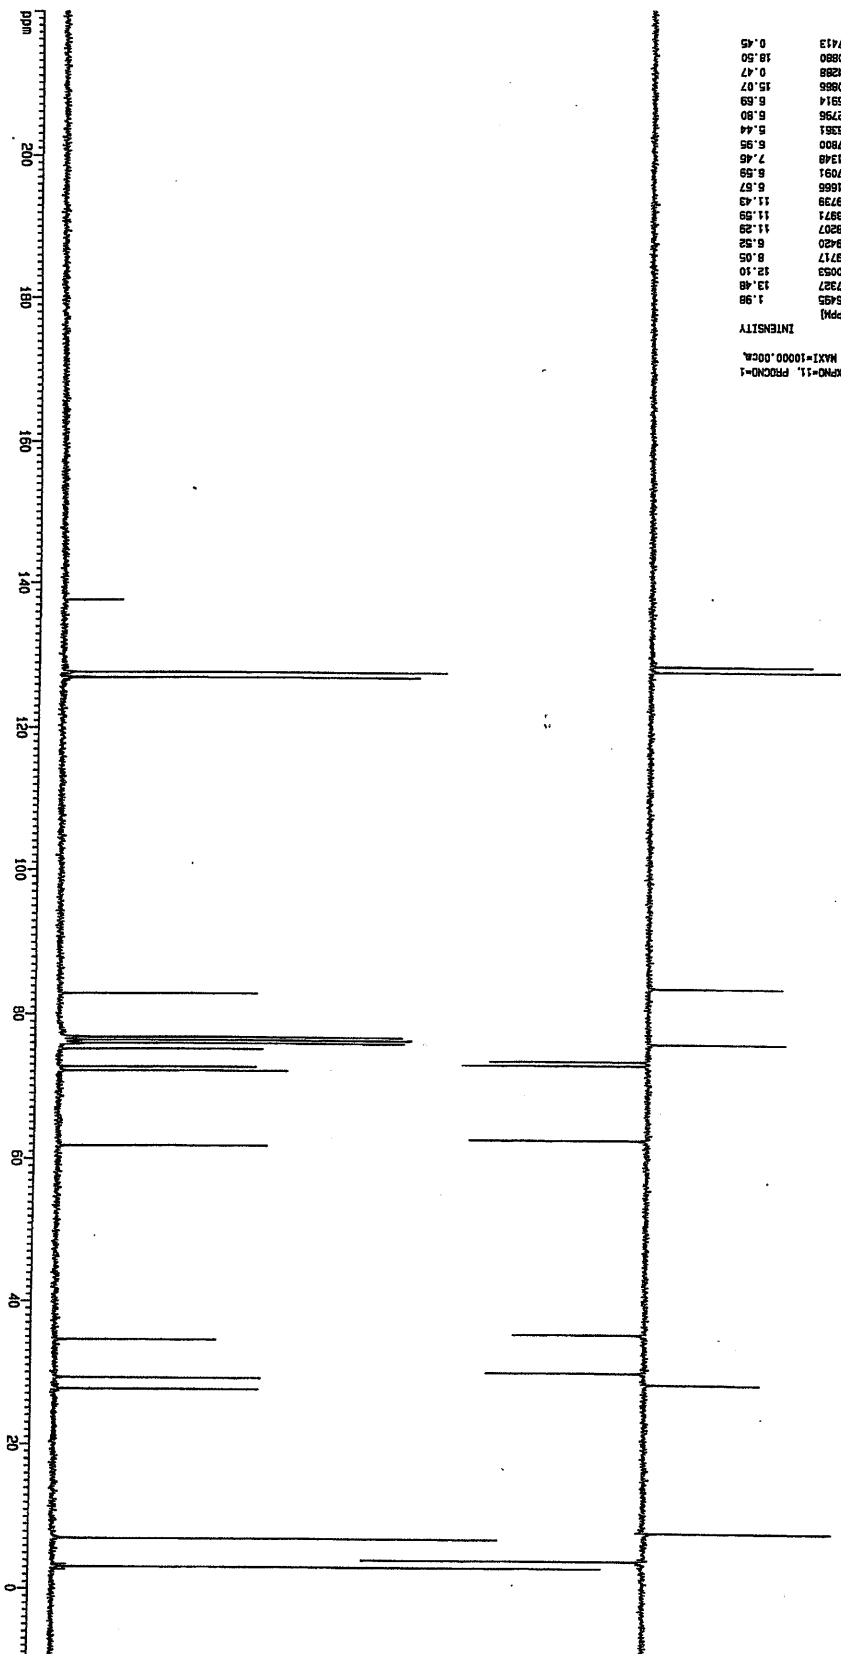

```

Time 4.15
INSTRUM spect
PROBHD 5 mm QNP 1H
PULPROG zgpg30
TD 65536
SOLVENT CDCl3
NS 6122
DS 4
SH 18516.518
FIDRES 0.055140
AQ 0.6847860
RG 6122
DE 27.430
TE 300.0
D1 0.02000000
D11 0.03000000
D12 0.00020000

===== CHANNEL f1 =====
NUC1 13C
P1 14.500
PL 0.00
SFO1 75.4756431

===== CHANNEL f2 =====
CPDPRG2 waltz16
NUC2 1H
PCPD2 105.00
R1 2.500
R12 14.00
R13 18.00
SF02 300.135010

F2 - Processing parameters
SI 32768
SF 75.4677593
EN 64
SSB 0
LB 1.00
GB 0
PC 1.40

ID NMR plot parameters
CX 35.00
YIP 2267.000
F1 16062.132
F2 -754.68
PRNO 6.57143
H2O 455.53127

```

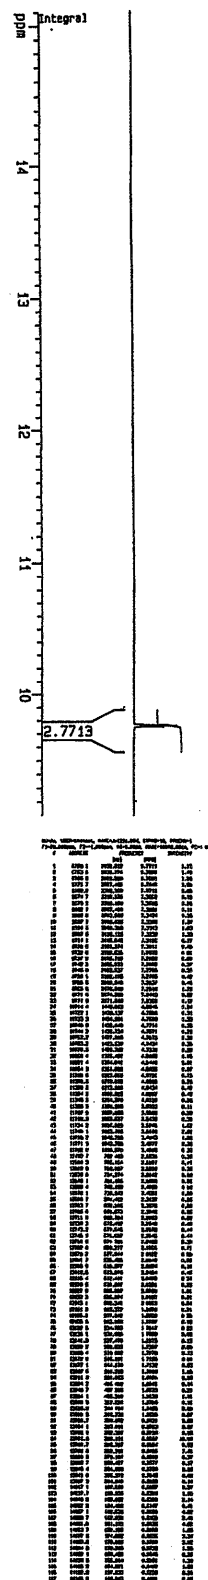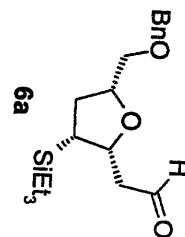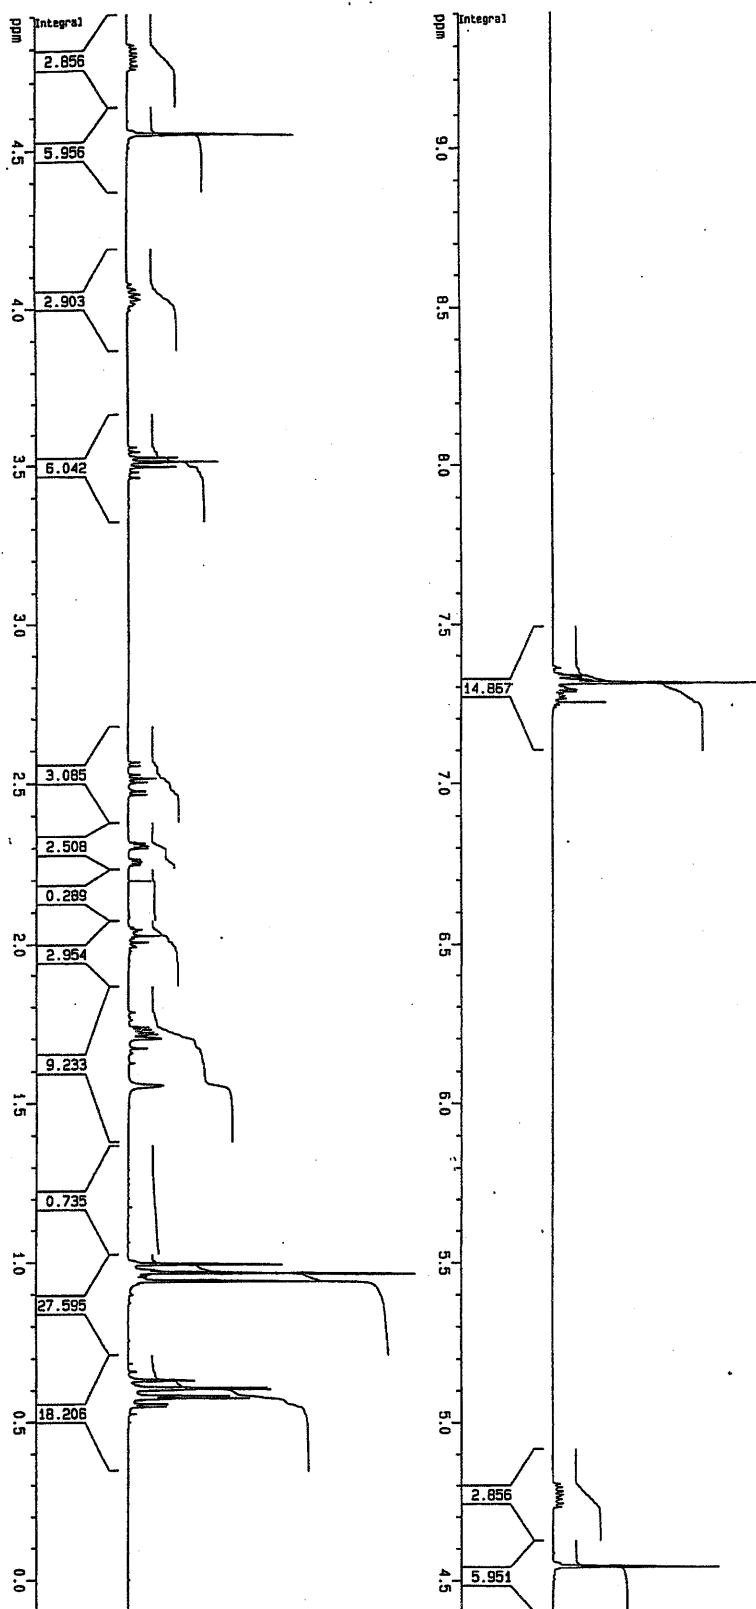

Time 22.44  
 INSTRUM spect  
 PULPROG 5 ms DNP 3H  
 F1 200  
 F2 200  
 F3 200  
 F4 200  
 NS 2  
 DS 2  
 SFR 6172.538 Hz  
 FIDRES 0.18936 Hz  
 AQ 2.05256 sec  
 RG 327.44  
 DA 81.000 usec  
 DE 4.50 usec  
 TE 300.0 K  
 D1 1.00000000 sec

NAME: 6a  
 P1 17.00 usec  
 P2 3.00 usec  
 P3 300.132400 Hz  
 SFO1 300.132400 Hz  
 F2 200  
 F3 200  
 F4 200  
 NS 2  
 DS 2  
 SFR 6172.538 Hz  
 FIDRES 0.18936 Hz  
 AQ 2.05256 sec  
 RG 327.44  
 DA 81.000 usec  
 DE 4.50 usec  
 TE 300.0 K  
 D1 1.00000000 sec

10 NMR plot parameters  
 CX 34.00 cm  
 F1 4.500 ppm  
 F2 14.000 ppm  
 F3 14.000 ppm  
 F4 14.000 ppm  
 F5 14.000 ppm  
 F6 14.000 ppm  
 F7 14.000 ppm  
 F8 14.000 ppm  
 F9 14.000 ppm  
 F10 14.000 ppm  
 F11 14.000 ppm  
 F12 14.000 ppm  
 F13 14.000 ppm  
 F14 14.000 ppm  
 F15 14.000 ppm  
 F16 14.000 ppm  
 F17 14.000 ppm  
 F18 14.000 ppm  
 F19 14.000 ppm  
 F20 14.000 ppm  
 F21 14.000 ppm  
 F22 14.000 ppm  
 F23 14.000 ppm  
 F24 14.000 ppm  
 F25 14.000 ppm  
 F26 14.000 ppm  
 F27 14.000 ppm  
 F28 14.000 ppm  
 F29 14.000 ppm  
 F30 14.000 ppm  
 F31 14.000 ppm  
 F32 14.000 ppm  
 F33 14.000 ppm  
 F34 14.000 ppm  
 F35 14.000 ppm  
 F36 14.000 ppm  
 F37 14.000 ppm  
 F38 14.000 ppm  
 F39 14.000 ppm  
 F40 14.000 ppm  
 F41 14.000 ppm  
 F42 14.000 ppm  
 F43 14.000 ppm  
 F44 14.000 ppm  
 F45 14.000 ppm  
 F46 14.000 ppm  
 F47 14.000 ppm  
 F48 14.000 ppm  
 F49 14.000 ppm  
 F50 14.000 ppm  
 F51 14.000 ppm  
 F52 14.000 ppm  
 F53 14.000 ppm  
 F54 14.000 ppm  
 F55 14.000 ppm  
 F56 14.000 ppm  
 F57 14.000 ppm  
 F58 14.000 ppm  
 F59 14.000 ppm  
 F60 14.000 ppm  
 F61 14.000 ppm  
 F62 14.000 ppm  
 F63 14.000 ppm  
 F64 14.000 ppm  
 F65 14.000 ppm  
 F66 14.000 ppm  
 F67 14.000 ppm  
 F68 14.000 ppm  
 F69 14.000 ppm  
 F70 14.000 ppm  
 F71 14.000 ppm  
 F72 14.000 ppm  
 F73 14.000 ppm  
 F74 14.000 ppm  
 F75 14.000 ppm  
 F76 14.000 ppm  
 F77 14.000 ppm  
 F78 14.000 ppm  
 F79 14.000 ppm  
 F80 14.000 ppm  
 F81 14.000 ppm  
 F82 14.000 ppm  
 F83 14.000 ppm  
 F84 14.000 ppm  
 F85 14.000 ppm  
 F86 14.000 ppm  
 F87 14.000 ppm  
 F88 14.000 ppm  
 F89 14.000 ppm  
 F90 14.000 ppm  
 F91 14.000 ppm  
 F92 14.000 ppm  
 F93 14.000 ppm  
 F94 14.000 ppm  
 F95 14.000 ppm  
 F96 14.000 ppm  
 F97 14.000 ppm  
 F98 14.000 ppm  
 F99 14.000 ppm  
 F100 14.000 ppm

Jim Li  
COC13  
80091-152

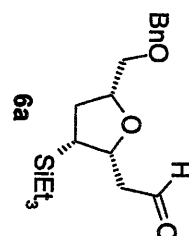

DU-V. USER: chemist; NAME: N1213.064; EXPNO: 11; PROCNO: 1  
F1: 230.713ppm; F2: 0.000ppm; M1: 0.00cm; M2: 10000.00cm

| #  | ADDRESS | FREQUENCY [Hz] | INTENSITY [ppm] |
|----|---------|----------------|-----------------|
| 1  | 3323.6  | 15443.699      | 204.6402        |
| 2  | 11884.1 | 10605.788      | 140.5344        |
| 3  | 13211.2 | 9801.781       | 130.5864        |
| 4  | 13308.8 | 9801.781       | 129.8809        |
| 5  | 13315.8 | 9796.869       | 129.8129        |
| 6  | 19731.3 | 6171.004       | 81.7703         |
| 7  | 20912.1 | 6012.351       | 79.6880         |
| 8  | 20946.1 | 5993.132       | 79.4133         |
| 9  | 20958.6 | 5980.400       | 79.2446         |
| 10 | 20125.1 | 5948.466       | 78.8215         |
| 11 | 20546.7 | 5710.224       | 75.6646         |
| 12 | 20627.8 | 5664.395       | 75.0873         |
| 13 | 23724.4 | 3914.379       | 51.8884         |
| 14 | 26284.1 | 2467.763       | 32.6956         |
| 15 | 26386.6 | 2409.878       | 31.9326         |
| 16 | 29882.8 | 748.214        | 5.9144          |
| 17 | 29882.8 | 748.214        | 5.9009          |

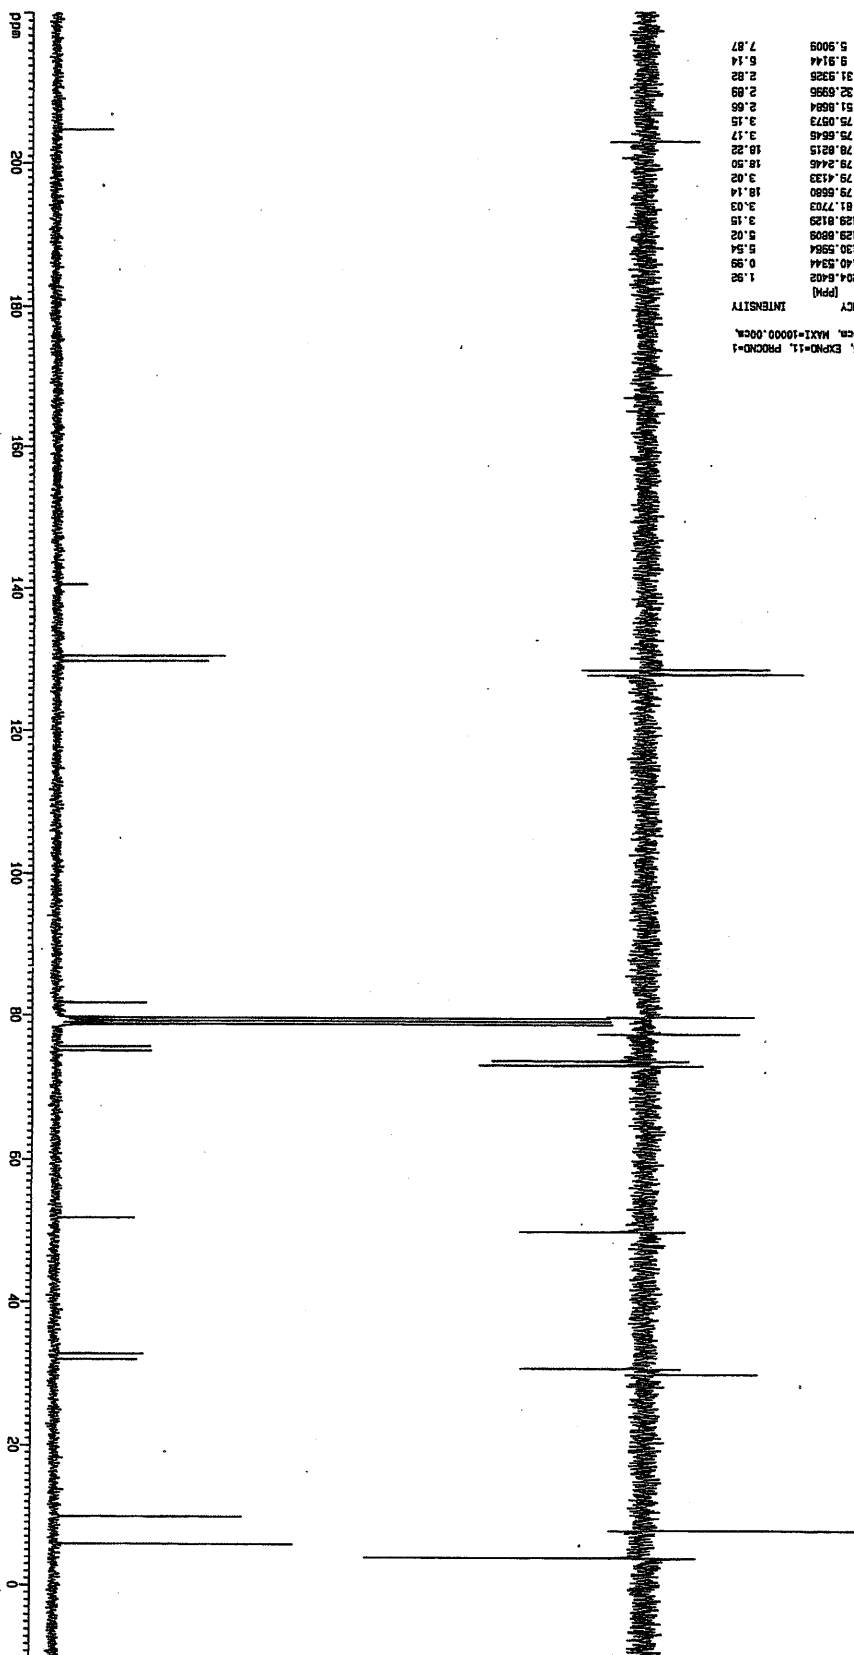

===== CHANNEL f1 =====  
NUC1 13C  
P1 11.25  
PL1 8.00  
SFO1 75.4758431

===== CHANNEL f2 =====  
CPDPRG2 waltz16  
NUC2 1H  
PCPD2 105.00  
PL2 -3.00  
PL12 15.00  
PL13 15.00  
SFO2 300.1350010

F2 - Processing param:  
SI 32768  
SF 75.4675794  
WDW EM  
SSB 0  
LB 1.00  
GB 0  
PC 1.40

10 NMR plot parameters:  
CX 33.00  
FIP 220.000  
F1 16882.87  
F2 -10.000  
F3 -754.18  
F4 -754.18  
F5 -754.18  
F6 -754.18  
F7 -754.18  
F8 -754.18  
F9 -754.18  
F10 -754.18  
F11 -754.18  
F12 -754.18  
F13 -754.18  
F14 -754.18  
F15 -754.18  
F16 -754.18  
F17 -754.18  
F18 -754.18  
F19 -754.18  
F20 -754.18  
F21 -754.18  
F22 -754.18  
F23 -754.18  
F24 -754.18  
F25 -754.18  
F26 -754.18  
F27 -754.18  
F28 -754.18  
F29 -754.18  
F30 -754.18  
F31 -754.18  
F32 -754.18  
F33 -754.18  
F34 -754.18  
F35 -754.18  
F36 -754.18  
F37 -754.18  
F38 -754.18  
F39 -754.18  
F40 -754.18  
F41 -754.18  
F42 -754.18  
F43 -754.18  
F44 -754.18  
F45 -754.18  
F46 -754.18  
F47 -754.18  
F48 -754.18  
F49 -754.18  
F50 -754.18  
F51 -754.18  
F52 -754.18  
F53 -754.18  
F54 -754.18  
F55 -754.18  
F56 -754.18  
F57 -754.18  
F58 -754.18  
F59 -754.18  
F60 -754.18  
F61 -754.18  
F62 -754.18  
F63 -754.18  
F64 -754.18  
F65 -754.18  
F66 -754.18  
F67 -754.18  
F68 -754.18  
F69 -754.18  
F70 -754.18  
F71 -754.18  
F72 -754.18  
F73 -754.18  
F74 -754.18  
F75 -754.18  
F76 -754.18  
F77 -754.18  
F78 -754.18  
F79 -754.18  
F80 -754.18  
F81 -754.18  
F82 -754.18  
F83 -754.18  
F84 -754.18  
F85 -754.18  
F86 -754.18  
F87 -754.18  
F88 -754.18  
F89 -754.18  
F90 -754.18  
F91 -754.18  
F92 -754.18  
F93 -754.18  
F94 -754.18  
F95 -754.18  
F96 -754.18  
F97 -754.18  
F98 -754.18  
F99 -754.18  
F100 -754.18

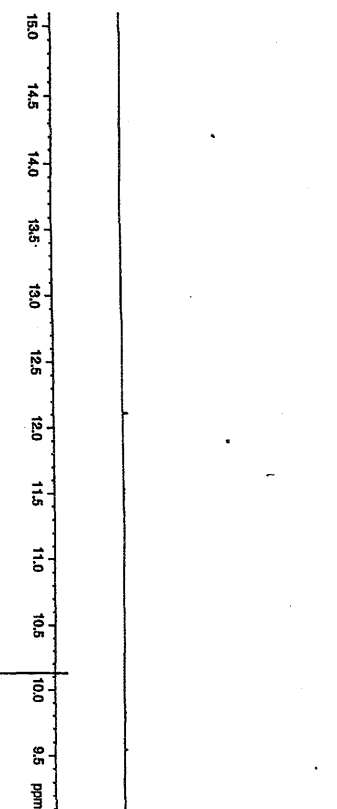

| Address | Frequency | Intensity |
|---------|-----------|-----------|
| 11948   | 12.1149   | 0.10      |
| 11949   | 12.1149   | 0.10      |
| 11950   | 12.1149   | 0.10      |
| 11951   | 12.1149   | 0.10      |
| 11952   | 12.1149   | 0.10      |
| 11953   | 12.1149   | 0.10      |
| 11954   | 12.1149   | 0.10      |
| 11955   | 12.1149   | 0.10      |
| 11956   | 12.1149   | 0.10      |
| 11957   | 12.1149   | 0.10      |
| 11958   | 12.1149   | 0.10      |
| 11959   | 12.1149   | 0.10      |
| 11960   | 12.1149   | 0.10      |
| 11961   | 12.1149   | 0.10      |
| 11962   | 12.1149   | 0.10      |
| 11963   | 12.1149   | 0.10      |
| 11964   | 12.1149   | 0.10      |
| 11965   | 12.1149   | 0.10      |
| 11966   | 12.1149   | 0.10      |
| 11967   | 12.1149   | 0.10      |
| 11968   | 12.1149   | 0.10      |
| 11969   | 12.1149   | 0.10      |
| 11970   | 12.1149   | 0.10      |
| 11971   | 12.1149   | 0.10      |
| 11972   | 12.1149   | 0.10      |
| 11973   | 12.1149   | 0.10      |
| 11974   | 12.1149   | 0.10      |
| 11975   | 12.1149   | 0.10      |
| 11976   | 12.1149   | 0.10      |
| 11977   | 12.1149   | 0.10      |
| 11978   | 12.1149   | 0.10      |
| 11979   | 12.1149   | 0.10      |
| 11980   | 12.1149   | 0.10      |
| 11981   | 12.1149   | 0.10      |
| 11982   | 12.1149   | 0.10      |
| 11983   | 12.1149   | 0.10      |
| 11984   | 12.1149   | 0.10      |
| 11985   | 12.1149   | 0.10      |
| 11986   | 12.1149   | 0.10      |
| 11987   | 12.1149   | 0.10      |
| 11988   | 12.1149   | 0.10      |
| 11989   | 12.1149   | 0.10      |
| 11990   | 12.1149   | 0.10      |
| 11991   | 12.1149   | 0.10      |
| 11992   | 12.1149   | 0.10      |
| 11993   | 12.1149   | 0.10      |
| 11994   | 12.1149   | 0.10      |
| 11995   | 12.1149   | 0.10      |
| 11996   | 12.1149   | 0.10      |
| 11997   | 12.1149   | 0.10      |
| 11998   | 12.1149   | 0.10      |
| 11999   | 12.1149   | 0.10      |
| 12000   | 12.1149   | 0.10      |
| 12001   | 12.1149   | 0.10      |
| 12002   | 12.1149   | 0.10      |
| 12003   | 12.1149   | 0.10      |
| 12004   | 12.1149   | 0.10      |
| 12005   | 12.1149   | 0.10      |
| 12006   | 12.1149   | 0.10      |
| 12007   | 12.1149   | 0.10      |
| 12008   | 12.1149   | 0.10      |
| 12009   | 12.1149   | 0.10      |
| 12010   | 12.1149   | 0.10      |
| 12011   | 12.1149   | 0.10      |
| 12012   | 12.1149   | 0.10      |
| 12013   | 12.1149   | 0.10      |
| 12014   | 12.1149   | 0.10      |
| 12015   | 12.1149   | 0.10      |
| 12016   | 12.1149   | 0.10      |
| 12017   | 12.1149   | 0.10      |
| 12018   | 12.1149   | 0.10      |
| 12019   | 12.1149   | 0.10      |
| 12020   | 12.1149   | 0.10      |
| 12021   | 12.1149   | 0.10      |
| 12022   | 12.1149   | 0.10      |
| 12023   | 12.1149   | 0.10      |
| 12024   | 12.1149   | 0.10      |
| 12025   | 12.1149   | 0.10      |
| 12026   | 12.1149   | 0.10      |
| 12027   | 12.1149   | 0.10      |
| 12028   | 12.1149   | 0.10      |
| 12029   | 12.1149   | 0.10      |
| 12030   | 12.1149   | 0.10      |
| 12031   | 12.1149   | 0.10      |
| 12032   | 12.1149   | 0.10      |
| 12033   | 12.1149   | 0.10      |
| 12034   | 12.1149   | 0.10      |
| 12035   | 12.1149   | 0.10      |
| 12036   | 12.1149   | 0.10      |
| 12037   | 12.1149   | 0.10      |
| 12038   | 12.1149   | 0.10      |
| 12039   | 12.1149   | 0.10      |
| 12040   | 12.1149   | 0.10      |
| 12041   | 12.1149   | 0.10      |
| 12042   | 12.1149   | 0.10      |
| 12043   | 12.1149   | 0.10      |
| 12044   | 12.1149   | 0.10      |
| 12045   | 12.1149   | 0.10      |
| 12046   | 12.1149   | 0.10      |
| 12047   | 12.1149   | 0.10      |
| 12048   | 12.1149   | 0.10      |
| 12049   | 12.1149   | 0.10      |
| 12050   | 12.1149   | 0.10      |
| 12051   | 12.1149   | 0.10      |
| 12052   | 12.1149   | 0.10      |
| 12053   | 12.1149   | 0.10      |
| 12054   | 12.1149   | 0.10      |
| 12055   | 12.1149   | 0.10      |
| 12056   | 12.1149   | 0.10      |
| 12057   | 12.1149   | 0.10      |
| 12058   | 12.1149   | 0.10      |
| 12059   | 12.1149   | 0.10      |
| 12060   | 12.1149   | 0.10      |
| 12061   | 12.1149   | 0.10      |
| 12062   | 12.1149   | 0.10      |
| 12063   | 12.1149   | 0.10      |
| 12064   | 12.1149   | 0.10      |
| 12065   | 12.1149   | 0.10      |
| 12066   | 12.1149   | 0.10      |
| 12067   | 12.1149   | 0.10      |
| 12068   | 12.1149   | 0.10      |
| 12069   | 12.1149   | 0.10      |
| 12070   | 12.1149   | 0.10      |
| 12071   | 12.1149   | 0.10      |
| 12072   | 12.1149   | 0.10      |
| 12073   | 12.1149   | 0.10      |
| 12074   | 12.1149   | 0.10      |
| 12075   | 12.1149   | 0.10      |
| 12076   | 12.1149   | 0.10      |
| 12077   | 12.1149   | 0.10      |
| 12078   | 12.1149   | 0.10      |
| 12079   | 12.1149   | 0.10      |
| 12080   | 12.1149   | 0.10      |
| 12081   | 12.1149   | 0.10      |
| 12082   | 12.1149   | 0.10      |
| 12083   | 12.1149   | 0.10      |
| 12084   | 12.1149   | 0.10      |
| 12085   | 12.1149   | 0.10      |
| 12086   | 12.1149   | 0.10      |
| 12087   | 12.1149   | 0.10      |
| 12088   | 12.1149   | 0.10      |
| 12089   | 12.1149   | 0.10      |
| 12090   | 12.1149   | 0.10      |
| 12091   | 12.1149   | 0.10      |
| 12092   | 12.1149   | 0.10      |
| 12093   | 12.1149   | 0.10      |
| 12094   | 12.1149   | 0.10      |
| 12095   | 12.1149   | 0.10      |
| 12096   | 12.1149   | 0.10      |
| 12097   | 12.1149   | 0.10      |
| 12098   | 12.1149   | 0.10      |
| 12099   | 12.1149   | 0.10      |
| 12100   | 12.1149   | 0.10      |

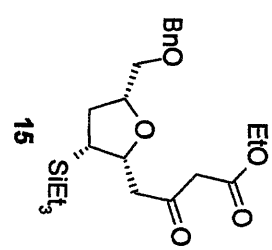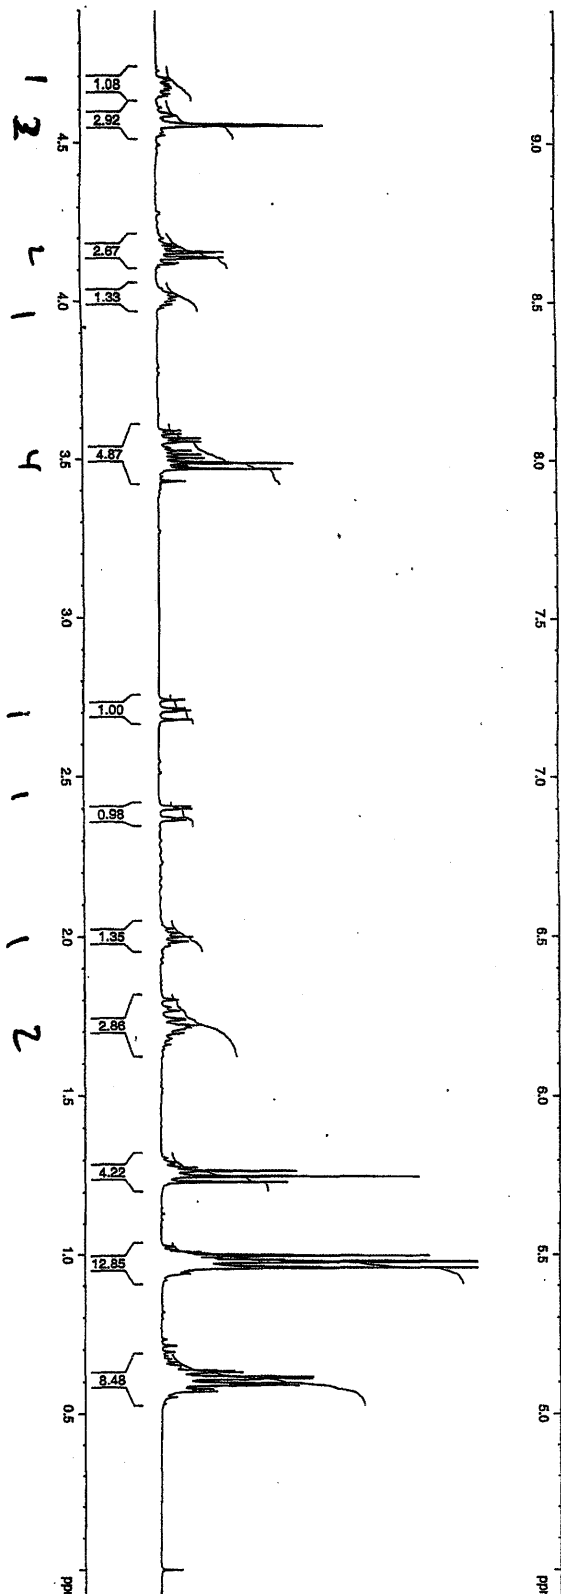

Current Data Parameters  
 NAME Jun2020081.045  
 P1 1  
 PROCNO 1

F2 - Acquisition Parameters  
 Date\_ 20080620  
 Time 16.02  
 INSTRUM spect  
 PROBO 5 mm PABBO BB/  
 PULPROG zg30  
 TD 32768  
 SOLVENT CDCl3  
 NS 16  
 DS 4  
 SWH 8278.146 Hz  
 FIDRES 0.252629 Hz  
 AQ 1.9792372 sec  
 RG 40.3  
 DW 60.400 usec  
 DE 5.00 usec  
 TE 300.0 K  
 D1 1.00000000 sec  
 D11 1

===== CHANNEL f1 =====  
 NUC1 1H  
 P1 11.25 usec  
 PL 3.00 dB  
 SFO1 400.1320007 MHz

F2 - Processing parameters  
 SI 32768  
 SF 400.130072 MHz  
 GB 0  
 SB -0.10 Hz  
 LB 0.3  
 GB 4.00  
 PC 1

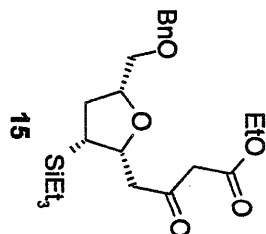

DU-VI USER=chemst, NAME=(U)22A.078, EXPNO=11, PROCNO=1  
F1=226.713ppm, F2=8.882ppm, M1=0.00cm, M2=1000.00cm, PC=1.500

| #  | ADDRESS | FREQUENCY [ppm] | INTENSITY |
|----|---------|-----------------|-----------|
| 1  | 3740.9  | 15283.086       | 3.34      |
| 2  | 8453.5  | 12855.951       | 2.63      |
| 3  | 12467.8 | 10458.369       | 2.48      |
| 4  | 13818.0 | 9711.313        | 13.69     |
| 5  | 13825.3 | 9707.829        | 14.12     |
| 6  | 13916.8 | 9655.147        | 7.52      |
| 7  | 13924.5 | 9652.987        | 5.80      |
| 8  | 20508.0 | 6013.295        | 4.47      |
| 9  | 20516.8 | 5953.099        | 78.9511   |
| 10 | 20767.2 | 5889.939        | 77.8480   |
| 11 | 20825.0 | 5805.033        | 77.4251   |
| 12 | 20882.8 | 5805.006        | 77.0012   |
| 13 | 21322.5 | 5582.783        | 73.7747   |
| 14 | 21436.1 | 5500.211        | 72.8448   |
| 15 | 22590.2 | 4640.872        | 61.4594   |
| 16 | 24501.4 | 3805.536        | 50.4897   |
| 17 | 24634.2 | 3732.080        | 49.4595   |
| 18 | 27204.2 | 2311.289        | 30.6528   |
| 19 | 27256.6 | 2276.761        | 30.1948   |
| 20 | 29404.1 | 1055.064        | 14.5229   |
| 21 | 30280.7 | 610.387         | 8.0552    |
| 22 | 30831.6 | 311.385         | 3.76      |
| 23 | 30831.2 | 308.053         | 18.50     |

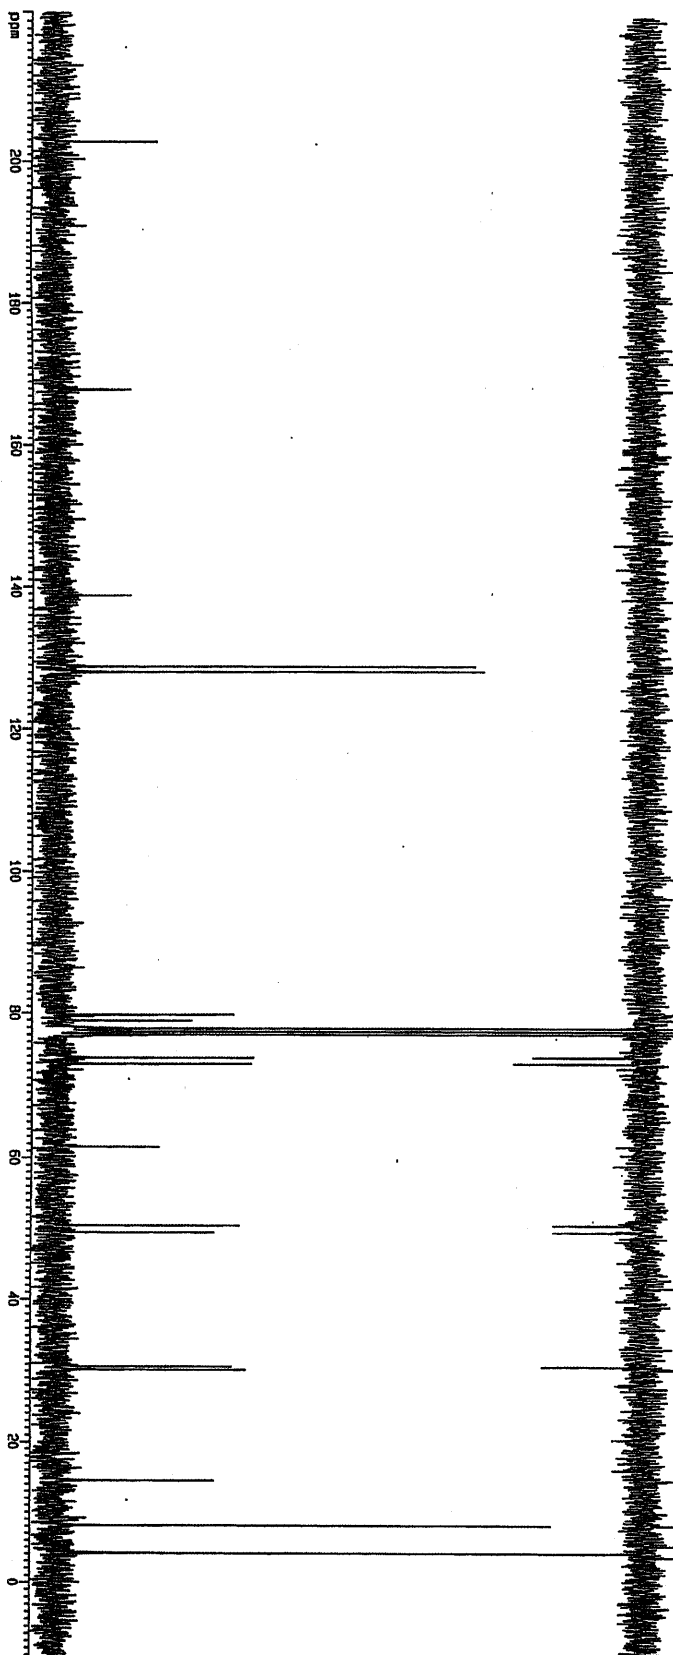

===== CHANNEL 11 =====  
NAME: 11  
P1: 13.26  
P2: 0.00  
SFO1: 75.4106393

===== CHANNEL 12 =====  
NAME: 12  
P1: 13.26  
P2: 0.00  
SFO1: 75.4106393

===== CHANNEL 13 =====  
NAME: 13  
P1: 13.26  
P2: 0.00  
SFO1: 75.4106393

===== CHANNEL 14 =====  
NAME: 14  
P1: 13.26  
P2: 0.00  
SFO1: 75.4106393

===== CHANNEL 15 =====  
NAME: 15  
P1: 13.26  
P2: 0.00  
SFO1: 75.4106393

===== CHANNEL 16 =====  
NAME: 16  
P1: 13.26  
P2: 0.00  
SFO1: 75.4106393

===== CHANNEL 17 =====  
NAME: 17  
P1: 13.26  
P2: 0.00  
SFO1: 75.4106393

===== CHANNEL 18 =====  
NAME: 18  
P1: 13.26  
P2: 0.00  
SFO1: 75.4106393

===== CHANNEL 19 =====  
NAME: 19  
P1: 13.26  
P2: 0.00  
SFO1: 75.4106393

===== CHANNEL 20 =====  
NAME: 20  
P1: 13.26  
P2: 0.00  
SFO1: 75.4106393

===== CHANNEL 21 =====  
NAME: 21  
P1: 13.26  
P2: 0.00  
SFO1: 75.4106393

===== CHANNEL 22 =====  
NAME: 22  
P1: 13.26  
P2: 0.00  
SFO1: 75.4106393

===== CHANNEL 23 =====  
NAME: 23  
P1: 13.26  
P2: 0.00  
SFO1: 75.4106393

===== CHANNEL 24 =====  
NAME: 24  
P1: 13.26  
P2: 0.00  
SFO1: 75.4106393

===== CHANNEL 25 =====  
NAME: 25  
P1: 13.26  
P2: 0.00  
SFO1: 75.4106393

===== CHANNEL 26 =====  
NAME: 26  
P1: 13.26  
P2: 0.00  
SFO1: 75.4106393

===== CHANNEL 27 =====  
NAME: 27  
P1: 13.26  
P2: 0.00  
SFO1: 75.4106393

===== CHANNEL 28 =====  
NAME: 28  
P1: 13.26  
P2: 0.00  
SFO1: 75.4106393

===== CHANNEL 29 =====  
NAME: 29  
P1: 13.26  
P2: 0.00  
SFO1: 75.4106393

===== CHANNEL 30 =====  
NAME: 30  
P1: 13.26  
P2: 0.00  
SFO1: 75.4106393

===== CHANNEL 31 =====  
NAME: 31  
P1: 13.26  
P2: 0.00  
SFO1: 75.4106393

===== CHANNEL 32 =====  
NAME: 32  
P1: 13.26  
P2: 0.00  
SFO1: 75.4106393

===== CHANNEL 33 =====  
NAME: 33  
P1: 13.26  
P2: 0.00  
SFO1: 75.4106393

===== CHANNEL 34 =====  
NAME: 34  
P1: 13.26  
P2: 0.00  
SFO1: 75.4106393

===== CHANNEL 35 =====  
NAME: 35  
P1: 13.26  
P2: 0.00  
SFO1: 75.4106393

===== CHANNEL 36 =====  
NAME: 36  
P1: 13.26  
P2: 0.00  
SFO1: 75.4106393

===== CHANNEL 37 =====  
NAME: 37  
P1: 13.26  
P2: 0.00  
SFO1: 75.4106393

===== CHANNEL 38 =====  
NAME: 38  
P1: 13.26  
P2: 0.00  
SFO1: 75.4106393

===== CHANNEL 39 =====  
NAME: 39  
P1: 13.26  
P2: 0.00  
SFO1: 75.4106393

===== CHANNEL 40 =====  
NAME: 40  
P1: 13.26  
P2: 0.00  
SFO1: 75.4106393

===== CHANNEL 41 =====  
NAME: 41  
P1: 13.26  
P2: 0.00  
SFO1: 75.4106393

===== CHANNEL 42 =====  
NAME: 42  
P1: 13.26  
P2: 0.00  
SFO1: 75.4106393

===== CHANNEL 43 =====  
NAME: 43  
P1: 13.26  
P2: 0.00  
SFO1: 75.4106393

===== CHANNEL 44 =====  
NAME: 44  
P1: 13.26  
P2: 0.00  
SFO1: 75.4106393

===== CHANNEL 45 =====  
NAME: 45  
P1: 13.26  
P2: 0.00  
SFO1: 75.4106393

===== CHANNEL 46 =====  
NAME: 46  
P1: 13.26  
P2: 0.00  
SFO1: 75.4106393

===== CHANNEL 47 =====  
NAME: 47  
P1: 13.26  
P2: 0.00  
SFO1: 75.4106393

===== CHANNEL 48 =====  
NAME: 48  
P1: 13.26  
P2: 0.00  
SFO1: 75.4106393

===== CHANNEL 49 =====  
NAME: 49  
P1: 13.26  
P2: 0.00  
SFO1: 75.4106393

===== CHANNEL 50 =====  
NAME: 50  
P1: 13.26  
P2: 0.00  
SFO1: 75.4106393

===== CHANNEL 51 =====  
NAME: 51  
P1: 13.26  
P2: 0.00  
SFO1: 75.4106393

===== CHANNEL 52 =====  
NAME: 52  
P1: 13.26  
P2: 0.00  
SFO1: 75.4106393

===== CHANNEL 53 =====  
NAME: 53  
P1: 13.26  
P2: 0.00  
SFO1: 75.4106393

===== CHANNEL 54 =====  
NAME: 54  
P1: 13.26  
P2: 0.00  
SFO1: 75.4106393

===== CHANNEL 55 =====  
NAME: 55  
P1: 13.26  
P2: 0.00  
SFO1: 75.4106393

===== CHANNEL 56 =====  
NAME: 56  
P1: 13.26  
P2: 0.00  
SFO1: 75.4106393

===== CHANNEL 57 =====  
NAME: 57  
P1: 13.26  
P2: 0.00  
SFO1: 75.4106393

===== CHANNEL 58 =====  
NAME: 58  
P1: 13.26  
P2: 0.00  
SFO1: 75.4106393

===== CHANNEL 59 =====  
NAME: 59  
P1: 13.26  
P2: 0.00  
SFO1: 75.4106393

===== CHANNEL 60 =====  
NAME: 60  
P1: 13.26  
P2: 0.00  
SFO1: 75.4106393

===== CHANNEL 61 =====  
NAME: 61  
P1: 13.26  
P2: 0.00  
SFO1: 75.4106393

===== CHANNEL 62 =====  
NAME: 62  
P1: 13.26  
P2: 0.00  
SFO1: 75.4106393

===== CHANNEL 63 =====  
NAME: 63  
P1: 13.26  
P2: 0.00  
SFO1: 75.4106393

===== CHANNEL 64 =====  
NAME: 64  
P1: 13.26  
P2: 0.00  
SFO1: 75.4106393

===== CHANNEL 65 =====  
NAME: 65  
P1: 13.26  
P2: 0.00  
SFO1: 75.4106393

===== CHANNEL 66 =====  
NAME: 66  
P1: 13.26  
P2: 0.00  
SFO1: 75.4106393

===== CHANNEL 67 =====  
NAME: 67  
P1: 13.26  
P2: 0.00  
SFO1: 75.4106393

===== CHANNEL 68 =====  
NAME: 68  
P1: 13.26  
P2: 0.00  
SFO1: 75.4106393

===== CHANNEL 69 =====  
NAME: 69  
P1: 13.26  
P2: 0.00  
SFO1: 75.4106393

===== CHANNEL 70 =====  
NAME: 70  
P1: 13.26  
P2: 0.00  
SFO1: 75.4106393

===== CHANNEL 71 =====  
NAME: 71  
P1: 13.26  
P2: 0.00  
SFO1: 75.4106393

===== CHANNEL 72 =====  
NAME: 72  
P1: 13.26  
P2: 0.00  
SFO1: 75.4106393

===== CHANNEL 73 =====  
NAME: 73  
P1: 13.26  
P2: 0.00  
SFO1: 75.4106393

===== CHANNEL 74 =====  
NAME: 74  
P1: 13.26  
P2: 0.00  
SFO1: 75.4106393

===== CHANNEL 75 =====  
NAME: 75  
P1: 13.26  
P2: 0.00  
SFO1: 75.4106393

===== CHANNEL 76 =====  
NAME: 76  
P1: 13.26  
P2: 0.00  
SFO1: 75.4106393

===== CHANNEL 77 =====  
NAME: 77  
P1: 13.26  
P2: 0.00  
SFO1: 75.4106393

===== CHANNEL 78 =====  
NAME: 78  
P1: 13.26  
P2: 0.00  
SFO1: 75.4106393

===== CHANNEL 79 =====  
NAME: 79  
P1: 13.26  
P2: 0.00  
SFO1: 75.4106393

===== CHANNEL 80 =====  
NAME: 80  
P1: 13.26  
P2: 0.00  
SFO1: 75.4106393

===== CHANNEL 81 =====  
NAME: 81  
P1: 13.26  
P2: 0.00  
SFO1: 75.4106393

===== CHANNEL 82 =====  
NAME: 82  
P1: 13.26  
P2: 0.00  
SFO1: 75.4106393

===== CHANNEL 83 =====  
NAME: 83  
P1: 13.26  
P2: 0.00  
SFO1: 75.4106393

===== CHANNEL 84 =====  
NAME: 84  
P1: 13.26  
P2: 0.00  
SFO1: 75.4106393

===== CHANNEL 85 =====  
NAME: 85  
P1: 13.26  
P2: 0.00  
SFO1: 75.4106393

===== CHANNEL 86 =====  
NAME: 86  
P1: 13.26  
P2: 0.00  
SFO1: 75.4106393

===== CHANNEL 87 =====  
NAME: 87  
P1: 13.26  
P2: 0.00  
SFO1: 75.4106393

===== CHANNEL 88 =====  
NAME: 88  
P1: 13.26  
P2: 0.00  
SFO1: 75.4106393

===== CHANNEL 89 =====  
NAME: 89  
P1: 13.26  
P2: 0.00  
SFO1: 75.4106393

===== CHANNEL 90 =====  
NAME: 90  
P1: 13.26  
P2: 0.00  
SFO1: 75.4106393

===== CHANNEL 91 =====  
NAME: 91  
P1: 13.26  
P2: 0.00  
SFO1: 75.4106393

===== CHANNEL 92 =====  
NAME: 92  
P1: 13.26  
P2: 0.00  
SFO1: 75.4106393

===== CHANNEL 93 =====  
NAME: 93  
P1: 13.26  
P2: 0.00  
SFO1: 75.4106393

===== CHANNEL 94 =====  
NAME: 94  
P1: 13.26  
P2: 0.00  
SFO1: 75.4106393

===== CHANNEL 95 =====  
NAME: 95  
P1: 13.26  
P2: 0.00  
SFO1: 75.4106393

===== CHANNEL 96 =====  
NAME: 96  
P1: 13.26  
P2: 0.00  
SFO1: 75.4106393

===== CHANNEL 97 =====  
NAME: 97  
P1: 13.26  
P2: 0.00  
SFO1: 75.4106393

===== CHANNEL 98 =====  
NAME: 98  
P1: 13.26  
P2: 0.00  
SFO1: 75.4106393

===== CHANNEL 99 =====  
NAME: 99  
P1: 13.26  
P2: 0.00  
SFO1: 75.4106393

===== CHANNEL 100 =====  
NAME: 100  
P1: 13.26  
P2: 0.00  
SFO1: 75.4106393

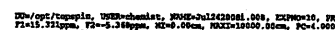

|     |       | PROSECUTION | DEFENSE |      |
|-----|-------|-------------|---------|------|
| 1   | 61664 | 3018-546    | 7-3426  | 0-03 |
| 2   | 63813 | 2788-768    | 7-3426  | 0-03 |
| 3   | 63821 | 2788-768    | 7-3445  | 8-01 |
| 4   | 63774 | 2845-265    | 7-3445  | 8-02 |
| 5   | 63800 | 2845-265    | 7-3445  | 8-02 |
| 6   | 63800 | 2845-265    | 7-3445  | 8-02 |
| 7   | 63814 | 2838-719    | 7-3446  | 8-07 |
| 8   | 63814 | 2838-719    | 7-3446  | 8-07 |
| 9   | 63814 | 2838-719    | 7-3446  | 8-07 |
| 10  | 63814 | 2838-719    | 7-3446  | 8-07 |
| 11  | 63840 | 2920-472    | 7-3446  | 8-07 |
| 12  | 63840 | 2920-472    | 7-3446  | 8-07 |
| 13  | 63840 | 2924-843    | 7-3591  | 9-12 |
| 14  | 63840 | 2924-843    | 7-3591  | 9-12 |
| 15  | 63840 | 2916-843    | 7-3589  | 9-14 |
| 16  | 63840 | 2916-843    | 7-3589  | 9-14 |
| 17  | 63840 | 2911-894    | 7-3776  | 9-11 |
| 18  | 63840 | 2911-894    | 7-3776  | 9-11 |
| 19  | 63840 | 2907-955    | 7-3653  | 9-07 |
| 20  | 63840 | 2907-955    | 7-3653  | 9-07 |
| 21  | 63840 | 2903-451    | 7-3563  | 9-07 |
| 22  | 63840 | 2903-451    | 7-3563  | 9-07 |
| 23  | 64718 | 1860-129    | 7-1480  | 0-02 |
| 24  | 64718 | 1860-129    | 7-1480  | 0-02 |
| 25  | 65020 | 2779-320    | 6-7990  | 0-02 |
| 26  | 65020 | 2779-320    | 6-7990  | 0-02 |
| 27  | 74111 | 2286-277    | 5-3620  | 0-34 |
| 28  | 74111 | 2286-277    | 5-3620  | 0-34 |
| 29  | 74111 | 2278-505    | 5-7568  | 0-07 |
| 30  | 74111 | 2278-505    | 5-7568  | 0-07 |
| 31  | 74848 | 2607-919    | 5-9014  | 1-89 |
| 32  | 74848 | 2607-919    | 5-9014  | 1-89 |
| 33  | 74848 | 2582-345    | 5-9083  | 0-61 |
| 34  | 74848 | 2582-345    | 5-9083  | 0-61 |
| 35  | 74848 | 2582-345    | 5-9083  | 0-61 |
| 36  | 74848 | 2582-345    | 5-9083  | 0-61 |
| 37  | 74848 | 2582-345    | 5-9083  | 0-61 |
| 38  | 74848 | 2582-345    | 5-9083  | 0-61 |
| 39  | 74848 | 2582-345    | 5-9083  | 0-61 |
| 40  | 74848 | 2582-345    | 5-9083  | 0-61 |
| 41  | 74848 | 2582-345    | 5-9083  | 0-61 |
| 42  | 74848 | 2582-345    | 5-9083  | 0-61 |
| 43  | 74848 | 2582-345    | 5-9083  | 0-61 |
| 44  | 74848 | 2582-345    | 5-9083  | 0-61 |
| 45  | 74848 | 2582-345    | 5-9083  | 0-61 |
| 46  | 74848 | 2582-345    | 5-9083  | 0-61 |
| 47  | 74848 | 2582-345    | 5-9083  | 0-61 |
| 48  | 74848 | 2582-345    | 5-9083  | 0-61 |
| 49  | 74848 | 2582-345    | 5-9083  | 0-61 |
| 50  | 74848 | 2582-345    | 5-9083  | 0-61 |
| 51  | 74848 | 2582-345    | 5-9083  | 0-61 |
| 52  | 74848 | 2582-345    | 5-9083  | 0-61 |
| 53  | 74848 | 2582-345    | 5-9083  | 0-61 |
| 54  | 74848 | 2582-345    | 5-9083  | 0-61 |
| 55  | 74848 | 2582-345    | 5-9083  | 0-61 |
| 56  | 74848 | 2582-345    | 5-9083  | 0-61 |
| 57  | 74848 | 2582-345    | 5-9083  | 0-61 |
| 58  | 74848 | 2582-345    | 5-9083  | 0-61 |
| 59  | 74848 | 2582-345    | 5-9083  | 0-61 |
| 60  | 74848 | 2582-345    | 5-9083  | 0-61 |
| 61  | 74848 | 2582-345    | 5-9083  | 0-61 |
| 62  | 74848 | 2582-345    | 5-9083  | 0-61 |
| 63  | 74848 | 2582-345    | 5-9083  | 0-61 |
| 64  | 74848 | 2582-345    | 5-9083  | 0-61 |
| 65  | 74848 | 2582-345    | 5-9083  | 0-61 |
| 66  | 74848 | 2582-345    | 5-9083  | 0-61 |
| 67  | 74848 | 2582-345    | 5-9083  | 0-61 |
| 68  | 74848 | 2582-345    | 5-9083  | 0-61 |
| 69  | 74848 | 2582-345    | 5-9083  | 0-61 |
| 70  | 74848 | 2582-345    | 5-9083  | 0-61 |
| 71  | 74848 | 2582-345    | 5-9083  | 0-61 |
| 72  | 74848 | 2582-345    | 5-9083  | 0-61 |
| 73  | 74848 | 2582-345    | 5-9083  | 0-61 |
| 74  | 74848 | 2582-345    | 5-9083  | 0-61 |
| 75  | 74848 | 2582-345    | 5-9083  | 0-61 |
| 76  | 74848 | 2582-345    | 5-9083  | 0-61 |
| 77  | 74848 | 2582-345    | 5-9083  | 0-61 |
| 78  | 74848 | 2582-345    | 5-9083  | 0-61 |
| 79  | 74848 | 2582-345    | 5-9083  | 0-61 |
| 80  | 74848 | 2582-345    | 5-9083  | 0-61 |
| 81  | 74848 | 2582-345    | 5-9083  | 0-61 |
| 82  | 74848 | 2582-345    | 5-9083  | 0-61 |
| 83  | 74848 | 2582-345    | 5-9083  | 0-61 |
| 84  | 74848 | 2582-345    | 5-9083  | 0-61 |
| 85  | 74848 | 2582-345    | 5-9083  | 0-61 |
| 86  | 74848 | 2582-345    | 5-9083  | 0-61 |
| 87  | 74848 | 2582-345    | 5-9083  | 0-61 |
| 88  | 74848 | 2582-345    | 5-9083  | 0-61 |
| 89  | 74848 | 2582-345    | 5-9083  | 0-61 |
| 90  | 74848 | 2582-345    | 5-9083  | 0-61 |
| 91  | 74848 | 2582-345    | 5-9083  | 0-61 |
| 92  | 74848 | 2582-345    | 5-9083  | 0-61 |
| 93  | 74848 | 2582-345    | 5-9083  | 0-61 |
| 94  | 74848 | 2582-345    | 5-9083  | 0-61 |
| 95  | 74848 | 2582-345    | 5-9083  | 0-61 |
| 96  | 74848 | 2582-345    | 5-9083  | 0-61 |
| 97  | 74848 | 2582-345    | 5-9083  | 0-61 |
| 98  | 74848 | 2582-345    | 5-9083  | 0-61 |
| 99  | 74848 | 2582-345    | 5-9083  | 0-61 |
| 100 | 74848 | 2582-345    | 5-9083  | 0-61 |

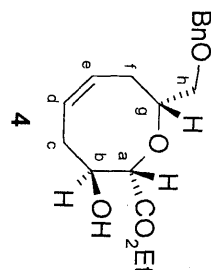

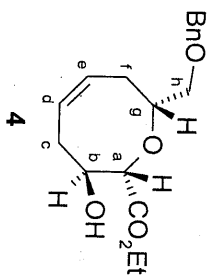

Instrument amc  
mf70184 L1 80091-153B cdc13 1p 170540

copy

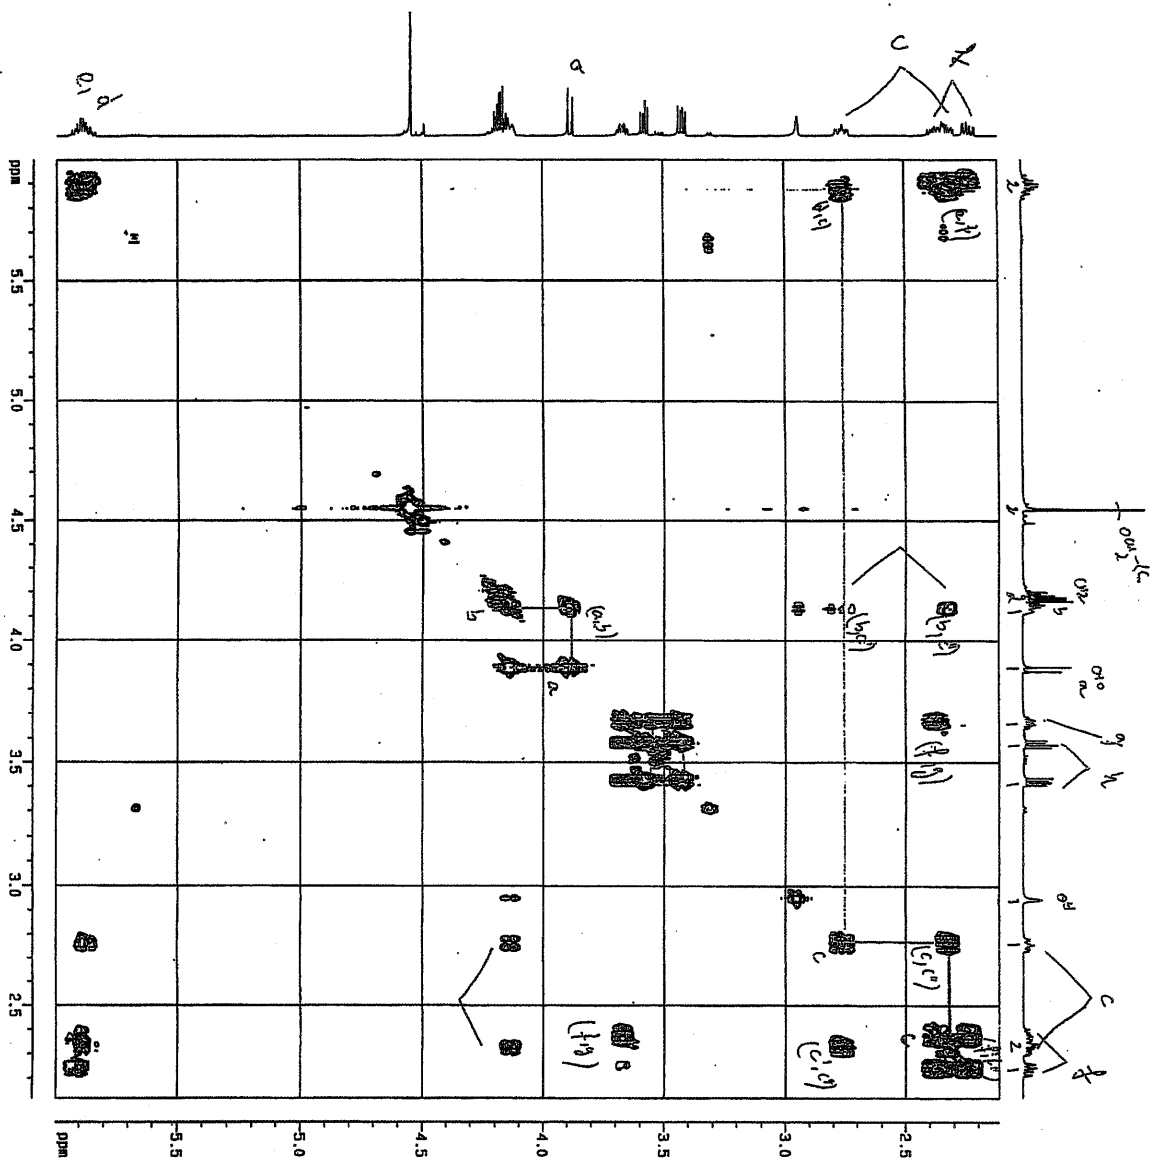

| NAME    | Current Data Parameters |
|---------|-------------------------|
| EXPNO   | 1                       |
| PROCNO  | 1                       |
| DATA    | 5.01                    |
| INSTRUM | 5 mm NMR                |
| PROBHD  | 5 mm NMR                |
| TD      | 32768                   |
| TE      | 300.2                   |
| SOLVENT | DMSO                    |
| NS      | 2                       |
| DS      | 4                       |
| SWH     | 124.400 MHz             |
| F2      | 124.400 MHz             |
| F1      | 124.400 MHz             |
| NUC1    | 13C                     |
| NUC2    | 13C                     |
| NUC3    | 13C                     |
| NUC4    | 13C                     |
| NUC5    | 13C                     |
| NUC6    | 13C                     |
| NUC7    | 13C                     |
| NUC8    | 13C                     |
| NUC9    | 13C                     |
| NUC10   | 13C                     |
| NUC11   | 13C                     |
| NUC12   | 13C                     |
| NUC13   | 13C                     |
| NUC14   | 13C                     |
| NUC15   | 13C                     |
| NUC16   | 13C                     |
| NUC17   | 13C                     |
| NUC18   | 13C                     |
| NUC19   | 13C                     |
| NUC20   | 13C                     |
| NUC21   | 13C                     |
| NUC22   | 13C                     |
| NUC23   | 13C                     |
| NUC24   | 13C                     |
| NUC25   | 13C                     |
| NUC26   | 13C                     |
| NUC27   | 13C                     |
| NUC28   | 13C                     |
| NUC29   | 13C                     |
| NUC30   | 13C                     |
| NUC31   | 13C                     |
| NUC32   | 13C                     |
| NUC33   | 13C                     |
| NUC34   | 13C                     |
| NUC35   | 13C                     |
| NUC36   | 13C                     |
| NUC37   | 13C                     |
| NUC38   | 13C                     |
| NUC39   | 13C                     |
| NUC40   | 13C                     |
| NUC41   | 13C                     |
| NUC42   | 13C                     |
| NUC43   | 13C                     |
| NUC44   | 13C                     |
| NUC45   | 13C                     |
| NUC46   | 13C                     |
| NUC47   | 13C                     |
| NUC48   | 13C                     |
| NUC49   | 13C                     |
| NUC50   | 13C                     |
| NUC51   | 13C                     |
| NUC52   | 13C                     |
| NUC53   | 13C                     |
| NUC54   | 13C                     |
| NUC55   | 13C                     |
| NUC56   | 13C                     |
| NUC57   | 13C                     |
| NUC58   | 13C                     |
| NUC59   | 13C                     |
| NUC60   | 13C                     |
| NUC61   | 13C                     |
| NUC62   | 13C                     |
| NUC63   | 13C                     |
| NUC64   | 13C                     |
| NUC65   | 13C                     |
| NUC66   | 13C                     |
| NUC67   | 13C                     |
| NUC68   | 13C                     |
| NUC69   | 13C                     |
| NUC70   | 13C                     |
| NUC71   | 13C                     |
| NUC72   | 13C                     |
| NUC73   | 13C                     |
| NUC74   | 13C                     |
| NUC75   | 13C                     |
| NUC76   | 13C                     |
| NUC77   | 13C                     |
| NUC78   | 13C                     |
| NUC79   | 13C                     |
| NUC80   | 13C                     |
| NUC81   | 13C                     |
| NUC82   | 13C                     |
| NUC83   | 13C                     |
| NUC84   | 13C                     |
| NUC85   | 13C                     |
| NUC86   | 13C                     |
| NUC87   | 13C                     |
| NUC88   | 13C                     |
| NUC89   | 13C                     |
| NUC90   | 13C                     |
| NUC91   | 13C                     |
| NUC92   | 13C                     |
| NUC93   | 13C                     |
| NUC94   | 13C                     |
| NUC95   | 13C                     |
| NUC96   | 13C                     |
| NUC97   | 13C                     |
| NUC98   | 13C                     |
| NUC99   | 13C                     |
| NUC100  | 13C                     |



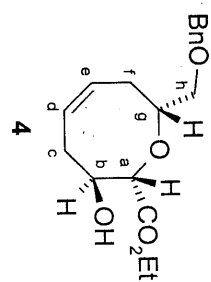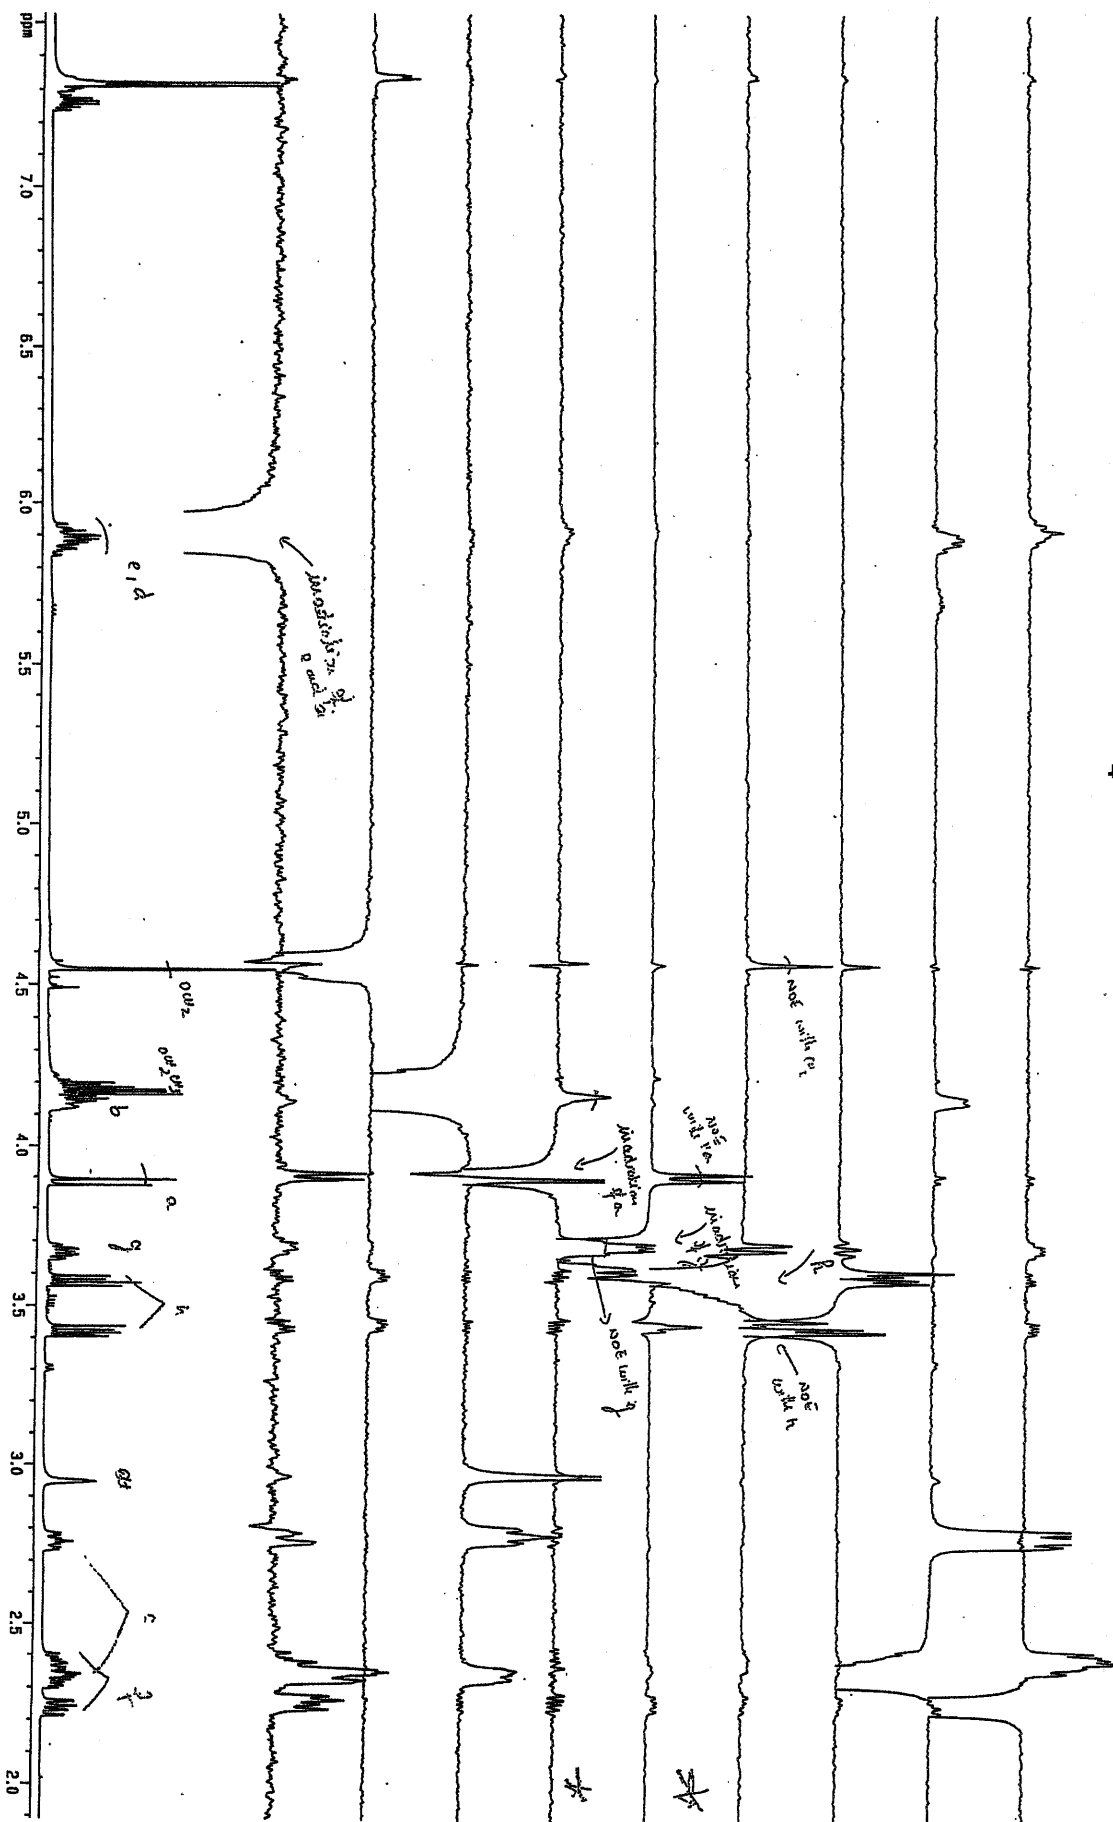

CC(C)(C)O[C@H]1C[C@@H](C)[C@H](CO)[C@@H]1CO

150 14.5 14.0 13.5 13.0 12.5 12.0 11.5 11.0 10.5 10.0 9.5 ppm

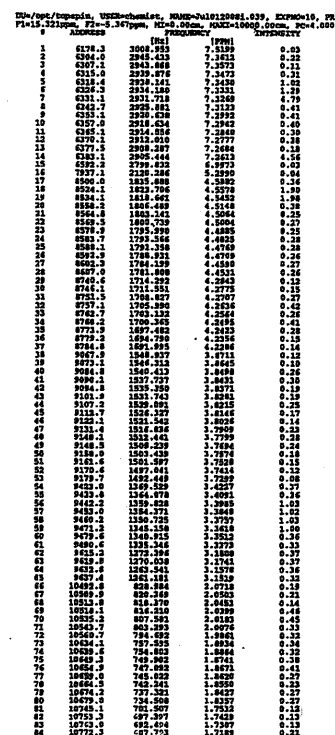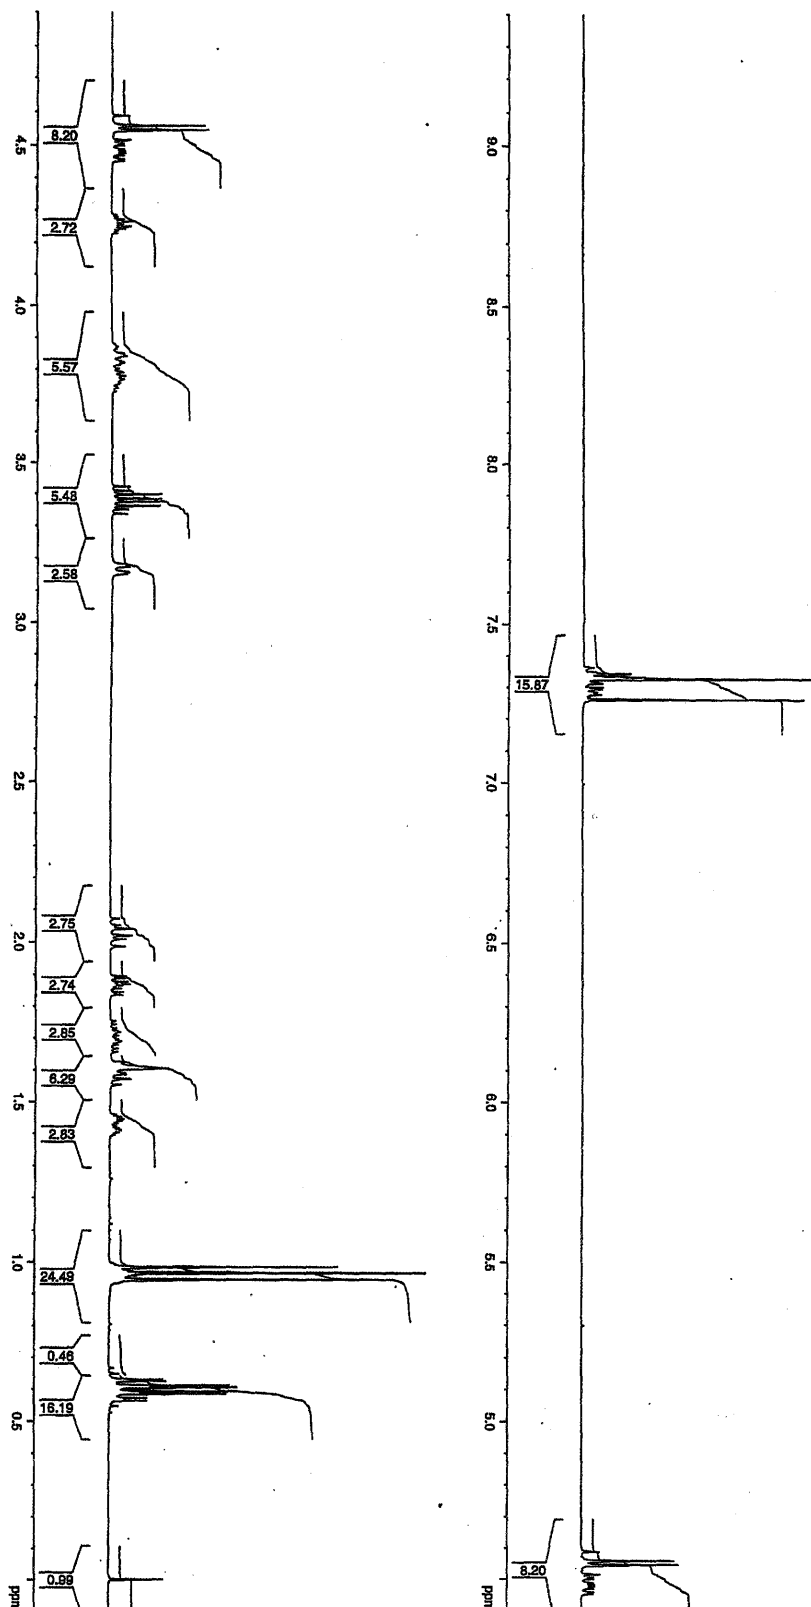

| Current          | Data           | Parameters |
|------------------|----------------|------------|
| NAME             | 010120081_035  |            |
| EXTNO            | 10             |            |
| PRGNO            | 1              |            |
| P2 - Acquisition | Parameters     |            |
| Date_            | 20080701       |            |
| Time             | 14:22          |            |
| PROBHD           | 5 mm PABBO BB1 |            |
| PROBPG           | 2930           |            |
| TD               | 32766          |            |
| SOLVENT          | CDCl3          |            |
| DS               | 2              |            |
| SWH              | 8278.16 Hz     |            |
| F1FMS            | 0.232629 Hz    |            |
| Q4               | 1.9792175 sec  |            |
| DS               | 56.400 usec    |            |
| TE               | 5.00 usec      |            |
| TS               | 300.0 K        |            |
| TD0              | 1.00000000 sec |            |
|                  | 1              |            |

|      | CHANNEL     | F1    | IF   |
|------|-------------|-------|------|
| NUC1 |             | 11.25 | usec |
| P1   |             | 3.00  | GB   |
| P1A  |             |       |      |
| SP01 | 400.1320007 |       | MHz  |

  

| P2 - Processing parameters |             |
|----------------------------|-------------|
| SI                         | 16384       |
| SP                         | 400.1300092 |
| WDW                        | GM          |
| SSB                        | 0           |
| GB                         | -0.10       |
| GB                         | 0.3         |
| PC                         | 4.00        |
|                            | Hz          |



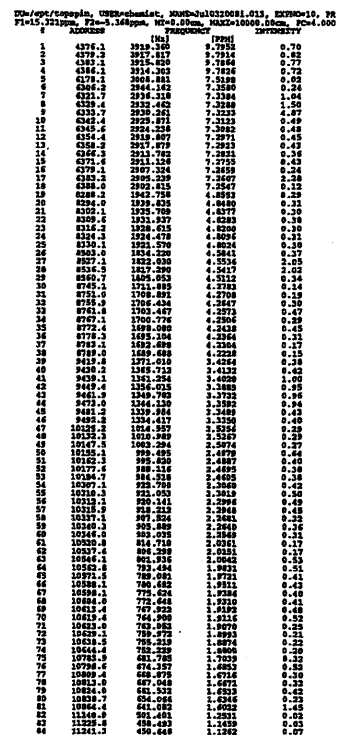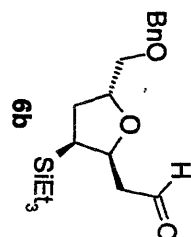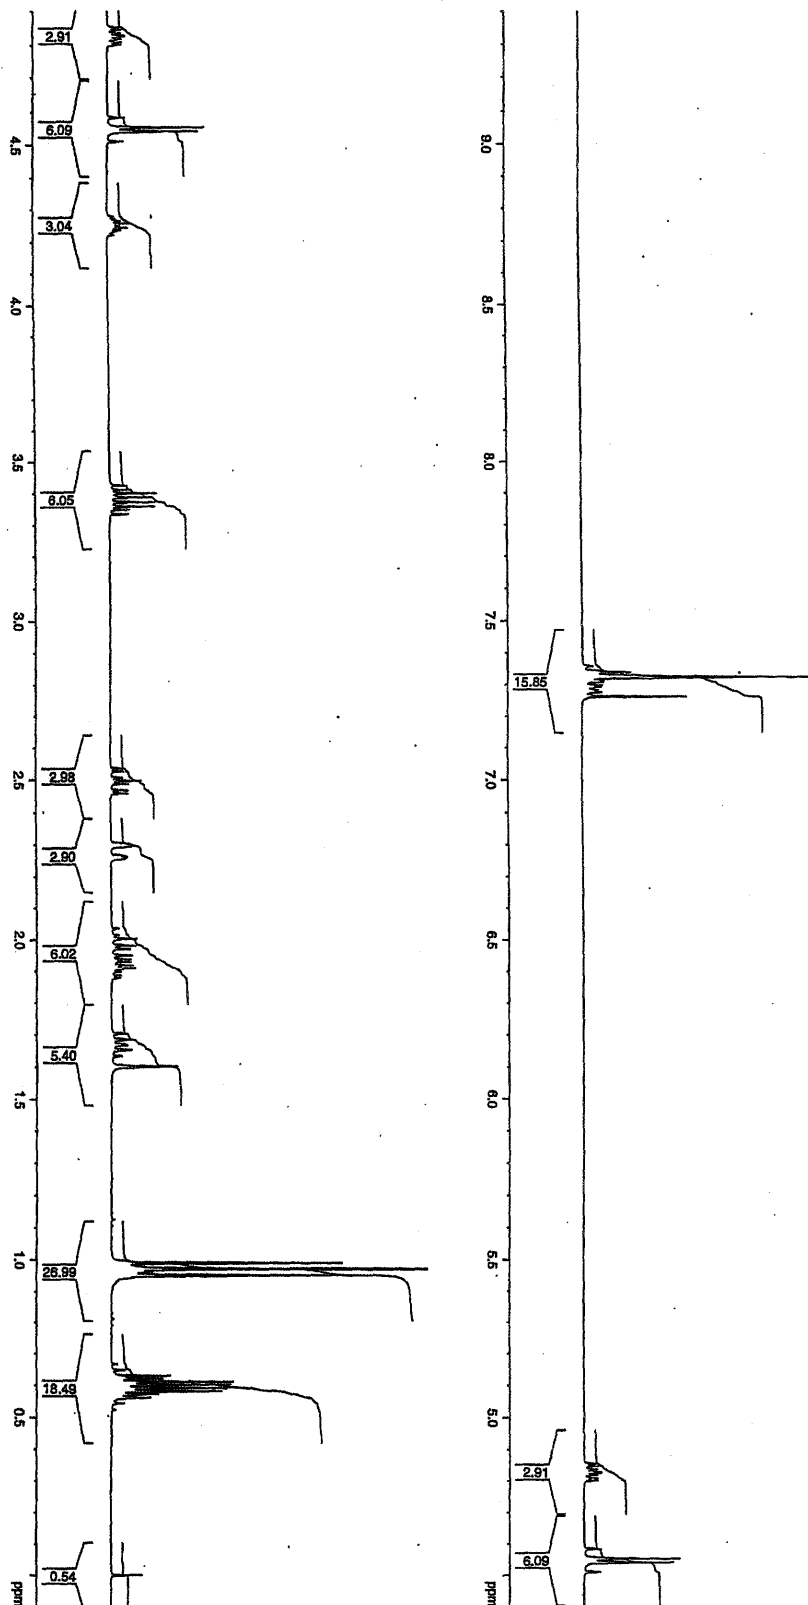

|                             |                 |
|-----------------------------|-----------------|
| Current                     | Data Parameters |
| NAME                        | JULIO20081_013  |
| EXPNO                       | 10              |
| F2 - Acquisition Parameters |                 |
| Date_                       | 20080703        |
| Time                        | 10-21           |
| Instrum                     | siemens         |
| Pulseprog                   | 5 mm PABBO BBD  |
| PROBHD                      | spect-          |
| TD                          | 3768            |
| SOLVENT                     | CDC13           |
| NS                          | 16              |
| DS                          | 4               |
| SWH                         | 8278.146 Hz     |
| FIDRES                      | 0.252425 Hz     |
| PTNRES                      | 1.979132 Hz     |
| NUC1                        | <sup>1</sup> H  |
| NUC2                        | <sup>13</sup> C |
| DW                          | 60.400 usec     |
| DE                          | 6.00 usec       |
| TE                          | 300.0 K         |
| D1                          | 1.00000000 sec  |
| TDO                         | 1               |
| CHANNEL F1                  |                 |
| NUC1                        | <sup>1</sup> H  |
| PULPRG                      | 1J25 usec       |
| FLA                         | 3.00 dB         |
| SPFO1                       | 400.1320007 MHz |
| F2 - Processing parameters  |                 |
| WDW                         | EM              |
| SSB                         | 400.1300851 MHz |
| GB                          | 0               |
| BK                          | -0.10 Hz        |
| CF                          | 0.3             |
| GC                          | 4.00            |

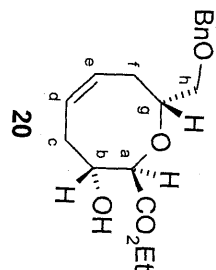

DIP: cpl/comple, UNK=Chemical, NAME=Jnl2920081.017, EXPNO=10, PR  
F1=10.130000, F2=10.130000, M0=2.0000, M0X2=10000.0000, PC=4.000  
FREQ=100.625

| Frequency | Intensity |
|-----------|-----------|
| 15.32     | 1.00      |
| 15.31     | 1.00      |
| 15.30     | 1.00      |
| 15.29     | 1.00      |
| 15.28     | 1.00      |
| 15.27     | 1.00      |
| 15.26     | 1.00      |
| 15.25     | 1.00      |
| 15.24     | 1.00      |
| 15.23     | 1.00      |
| 15.22     | 1.00      |
| 15.21     | 1.00      |
| 15.20     | 1.00      |
| 15.19     | 1.00      |
| 15.18     | 1.00      |
| 15.17     | 1.00      |
| 15.16     | 1.00      |
| 15.15     | 1.00      |
| 15.14     | 1.00      |
| 15.13     | 1.00      |
| 15.12     | 1.00      |
| 15.11     | 1.00      |
| 15.10     | 1.00      |
| 15.09     | 1.00      |
| 15.08     | 1.00      |
| 15.07     | 1.00      |
| 15.06     | 1.00      |
| 15.05     | 1.00      |
| 15.04     | 1.00      |
| 15.03     | 1.00      |
| 15.02     | 1.00      |
| 15.01     | 1.00      |
| 15.00     | 1.00      |
| 14.99     | 1.00      |
| 14.98     | 1.00      |
| 14.97     | 1.00      |
| 14.96     | 1.00      |
| 14.95     | 1.00      |
| 14.94     | 1.00      |
| 14.93     | 1.00      |
| 14.92     | 1.00      |
| 14.91     | 1.00      |
| 14.90     | 1.00      |
| 14.89     | 1.00      |
| 14.88     | 1.00      |
| 14.87     | 1.00      |
| 14.86     | 1.00      |
| 14.85     | 1.00      |
| 14.84     | 1.00      |
| 14.83     | 1.00      |
| 14.82     | 1.00      |
| 14.81     | 1.00      |
| 14.80     | 1.00      |
| 14.79     | 1.00      |
| 14.78     | 1.00      |
| 14.77     | 1.00      |
| 14.76     | 1.00      |
| 14.75     | 1.00      |
| 14.74     | 1.00      |
| 14.73     | 1.00      |
| 14.72     | 1.00      |
| 14.71     | 1.00      |
| 14.70     | 1.00      |
| 14.69     | 1.00      |
| 14.68     | 1.00      |
| 14.67     | 1.00      |
| 14.66     | 1.00      |
| 14.65     | 1.00      |
| 14.64     | 1.00      |
| 14.63     | 1.00      |
| 14.62     | 1.00      |
| 14.61     | 1.00      |
| 14.60     | 1.00      |
| 14.59     | 1.00      |
| 14.58     | 1.00      |
| 14.57     | 1.00      |
| 14.56     | 1.00      |
| 14.55     | 1.00      |
| 14.54     | 1.00      |
| 14.53     | 1.00      |
| 14.52     | 1.00      |
| 14.51     | 1.00      |
| 14.50     | 1.00      |
| 14.49     | 1.00      |
| 14.48     | 1.00      |
| 14.47     | 1.00      |
| 14.46     | 1.00      |
| 14.45     | 1.00      |
| 14.44     | 1.00      |
| 14.43     | 1.00      |
| 14.42     | 1.00      |
| 14.41     | 1.00      |
| 14.40     | 1.00      |
| 14.39     | 1.00      |
| 14.38     | 1.00      |
| 14.37     | 1.00      |
| 14.36     | 1.00      |
| 14.35     | 1.00      |
| 14.34     | 1.00      |
| 14.33     | 1.00      |
| 14.32     | 1.00      |
| 14.31     | 1.00      |
| 14.30     | 1.00      |
| 14.29     | 1.00      |
| 14.28     | 1.00      |
| 14.27     | 1.00      |
| 14.26     | 1.00      |
| 14.25     | 1.00      |
| 14.24     | 1.00      |
| 14.23     | 1.00      |
| 14.22     | 1.00      |
| 14.21     | 1.00      |
| 14.20     | 1.00      |
| 14.19     | 1.00      |
| 14.18     | 1.00      |
| 14.17     | 1.00      |
| 14.16     | 1.00      |
| 14.15     | 1.00      |
| 14.14     | 1.00      |
| 14.13     | 1.00      |
| 14.12     | 1.00      |
| 14.11     | 1.00      |
| 14.10     | 1.00      |
| 14.09     | 1.00      |
| 14.08     | 1.00      |
| 14.07     | 1.00      |
| 14.06     | 1.00      |
| 14.05     | 1.00      |
| 14.04     | 1.00      |
| 14.03     | 1.00      |
| 14.02     | 1.00      |
| 14.01     | 1.00      |
| 14.00     | 1.00      |
| 13.99     | 1.00      |
| 13.98     | 1.00      |
| 13.97     | 1.00      |
| 13.96     | 1.00      |
| 13.95     | 1.00      |
| 13.94     | 1.00      |
| 13.93     | 1.00      |
| 13.92     | 1.00      |
| 13.91     | 1.00      |
| 13.90     | 1.00      |
| 13.89     | 1.00      |
| 13.88     | 1.00      |
| 13.87     | 1.00      |
| 13.86     | 1.00      |
| 13.85     | 1.00      |
| 13.84     | 1.00      |
| 13.83     | 1.00      |
| 13.82     | 1.00      |
| 13.81     | 1.00      |
| 13.80     | 1.00      |
| 13.79     | 1.00      |
| 13.78     | 1.00      |
| 13.77     | 1.00      |
| 13.76     | 1.00      |
| 13.75     | 1.00      |
| 13.74     | 1.00      |
| 13.73     | 1.00      |
| 13.72     | 1.00      |
| 13.71     | 1.00      |
| 13.70     | 1.00      |
| 13.69     | 1.00      |
| 13.68     | 1.00      |
| 13.67     | 1.00      |
| 13.66     | 1.00      |
| 13.65     | 1.00      |
| 13.64     | 1.00      |
| 13.63     | 1.00      |
| 13.62     | 1.00      |
| 13.61     | 1.00      |
| 13.60     | 1.00      |
| 13.59     | 1.00      |
| 13.58     | 1.00      |
| 13.57     | 1.00      |
| 13.56     | 1.00      |
| 13.55     | 1.00      |
| 13.54     | 1.00      |
| 13.53     | 1.00      |
| 13.52     | 1.00      |
| 13.51     | 1.00      |
| 13.50     | 1.00      |
| 13.49     | 1.00      |
| 13.48     | 1.00      |
| 13.47     | 1.00      |
| 13.46     | 1.00      |
| 13.45     | 1.00      |
| 13.44     | 1.00      |
| 13.43     | 1.00      |
| 13.42     | 1.00      |
| 13.41     | 1.00      |
| 13.40     | 1.00      |
| 13.39     | 1.00      |
| 13.38     | 1.00      |
| 13.37     | 1.00      |
| 13.36     | 1.00      |
| 13.35     | 1.00      |
| 13.34     | 1.00      |
| 13.33     | 1.00      |
| 13.32     | 1.00      |
| 13.31     | 1.00      |
| 13.30     | 1.00      |
| 13.29     | 1.00      |
| 13.28     | 1.00      |
| 13.27     | 1.00      |
| 13.26     | 1.00      |
| 13.25     | 1.00      |
| 13.24     | 1.00      |
| 13.23     | 1.00      |
| 13.22     | 1.00      |
| 13.21     | 1.00      |
| 13.20     | 1.00      |
| 13.19     | 1.00      |
| 13.18     | 1.00      |
| 13.17     | 1.00      |
| 13.16     | 1.00      |
| 13.15     | 1.00      |
| 13.14     | 1.00      |
| 13.13     | 1.00      |
| 13.12     | 1.00      |
| 13.11     | 1.00      |
| 13.10     | 1.00      |
| 13.09     | 1.00      |
| 13.08     | 1.00      |
| 13.07     | 1.00      |
| 13.06     | 1.00      |
| 13.05     | 1.00      |
| 13.04     | 1.00      |
| 13.03     | 1.00      |
| 13.02     | 1.00      |
| 13.01     | 1.00      |
| 13.00     | 1.00      |
| 12.99     | 1.00      |
| 12.98     | 1.00      |
| 12.97     | 1.00      |
| 12.96     | 1.00      |
| 12.95     | 1.00      |
| 12.94     | 1.00      |
| 12.93     | 1.00      |
| 12.92     | 1.00      |
| 12.91     | 1.00      |
| 12.90     | 1.00      |
| 12.89     | 1.00      |
| 12.88     | 1.00      |
| 12.87     | 1.00      |
| 12.86     | 1.00      |
| 12.85     | 1.00      |
| 12.84     | 1.00      |
| 12.83     | 1.00      |
| 12.82     | 1.00      |
| 12.81     | 1.00      |
| 12.80     | 1.00      |
| 12.79     | 1.00      |
| 12.78     | 1.00      |
| 12.77     | 1.00      |
| 12.76     | 1.00      |
| 12.75     | 1.00      |
| 12.74     | 1.00      |
| 12.73     | 1.00      |
| 12.72     | 1.00      |
| 12.71     | 1.00      |
| 12.70     | 1.00      |
| 12.69     | 1.00      |
| 12.68     | 1.00      |
| 12.67     | 1.00      |
| 12.66     | 1.00      |
| 12.65     | 1.00      |
| 12.64     | 1.00      |
| 12.63     | 1.00      |
| 12.62     | 1.00      |
| 12.61     | 1.00      |
| 12.60     | 1.00      |
| 12.59     | 1.00      |
| 12.58     | 1.00      |
| 12.57     | 1.00      |
| 12.56     | 1.00      |
| 12.55     | 1.00      |
| 12.54     | 1.00      |
| 12.53     | 1.00      |
| 12.52     | 1.00      |
| 12.51     | 1.00      |
| 12.50     | 1.00      |
| 12.49     | 1.00      |
| 12.48     | 1.00      |
| 12.47     | 1.00      |
| 12.46     | 1.00      |
| 12.45     | 1.00      |
| 12.44     | 1.00      |
| 12.43     | 1.00      |
| 12.42     | 1.00      |
| 12.41     | 1.00      |
| 12.40     | 1.00      |
| 12.39     | 1.00      |
| 12.38     | 1.00      |
| 12.37     | 1.00      |
| 12.36     | 1.00      |
| 12.35     | 1.00      |
| 12.34     | 1.00      |
| 12.33     | 1.00      |
| 12.32     | 1.00      |
| 12.31     | 1.00      |
| 12.30     | 1.00      |
| 12.29     | 1.00      |
| 12.28     | 1.00      |
| 12.27     | 1.00      |
| 12.26     | 1.00      |
| 12.25     | 1.00      |
| 12.24     | 1.00      |
| 12.23     | 1.00      |
| 12.22     | 1.00      |
| 12.21     | 1.00      |
| 12.20     | 1.00      |
| 12.19     | 1.00      |
| 12.18     | 1.00      |
| 12.17     | 1.00      |
| 12.16     | 1.00      |
| 12.15     | 1.00      |
| 12.14     | 1.00      |
| 12.13     | 1.00      |
| 12.12     | 1.00      |
| 12.11     | 1.00      |
| 12.10     | 1.00      |
| 12.09     | 1.00      |
| 12.08     | 1.00      |
| 12.07     | 1.00      |
| 12.06     | 1.00      |
| 12.05     | 1.00      |
| 12.04     | 1.00      |
| 12.03     | 1.00      |
| 12.02     | 1.00      |
| 12.01     | 1.00      |
| 12.00     | 1.00      |
| 11.99     | 1.00      |
| 11.98     | 1.00      |
| 11.97     | 1.00      |
| 11.96     | 1.00      |
| 11.95     | 1.00      |
| 11.94     | 1.00      |
| 11.93     | 1.00      |
| 11.92     | 1.00      |
| 11.91     | 1.00      |
| 11.90     | 1.00      |
| 11.89     | 1.00      |
| 11.88     | 1.00      |
| 11.87     | 1.00      |
| 11.86     | 1.00      |
| 11.85     | 1.00      |
| 11.84     | 1.00      |
| 11.83     | 1.00      |
| 11.82     | 1.00      |
| 11.81     | 1.00      |
| 11.80     | 1.00      |
| 11.79     | 1.00      |
| 11.78     | 1.00      |
| 11.77     | 1.00      |
| 11.76     | 1.00      |
| 11.75     | 1.00      |
| 11.74     | 1.00      |
| 11.73     | 1.00      |
| 11.72     | 1.00      |
| 11.71     | 1.00      |
| 11.70     | 1.00      |
| 11.69     | 1.00      |
| 11.68     | 1.00      |
| 11.67     | 1.00      |
| 11.66     | 1.00      |
| 11.65     | 1.00      |
| 11.64     | 1.00      |
| 11.63     | 1.00      |
| 11.62     | 1.00      |
| 11.61     | 1.00      |
| 11.60     | 1.00      |
| 11.59     | 1.00      |
| 11.58     | 1.00      |
| 11.57     | 1.00      |
| 11.56     | 1.00      |
| 11.55     | 1.00      |
| 11.54     | 1.00      |
| 11.53     | 1.00      |
| 11.52     | 1.00      |
| 11.51     | 1.00      |
| 11.50     | 1.00      |
| 11.49     | 1.00      |
| 11.48     | 1.00      |
| 11.47     | 1.00      |
| 11.46     | 1.00      |
| 11.45     | 1.00      |
| 11.44     | 1.00      |
| 11.43     | 1.00      |
| 11.42     | 1.00      |
| 11.41     | 1.00      |
| 11.40     | 1.00      |
| 11.39     | 1.00      |
| 11.38     | 1.00      |
| 11.37     | 1.00      |
| 11.36     | 1.00      |
| 11.35     | 1.00      |
| 11.34     | 1.00      |
| 11.33     | 1.00      |
| 11.32     | 1.00      |
| 11.31     | 1.00      |
| 11.30     | 1.00      |
| 11.29     | 1.00      |
| 11.28     | 1.00      |
| 11.27     | 1.00      |
| 11.26     | 1.00      |
| 11.25     | 1.00      |
| 11.24     | 1.00      |
| 11.23     | 1.00      |
| 11.22     | 1.00      |
| 11.21     | 1.00      |
| 11.20     | 1.00      |
| 11.19     | 1.00      |
| 11.18     | 1.00      |
| 11.17     | 1.00      |
| 11.16     | 1.00      |
| 11.15     | 1.00      |
| 11.14     | 1.00      |
| 11.13     | 1.00      |
| 11.12     | 1.00      |
| 11.11     | 1.00      |
| 11.10     | 1.00      |
| 11.09     | 1.00      |
| 11.08     | 1.00      |
| 11.07     | 1.00      |
| 11.06     | 1.00      |
| 11.05     | 1.00      |
| 11.04     | 1.00      |
| 11.03     | 1.00      |
| 11.02     | 1.00      |
| 11.01     | 1.00      |
| 11.00     | 1.00      |
| 10.99     | 1.00      |
| 10.98     | 1.00      |
| 10.97     | 1.00      |
| 10.96     | 1.00      |
| 10.95     | 1.00      |
| 10.94     | 1.00      |
| 10.93     | 1.00      |
| 10.92     | 1.00      |
| 10.91     | 1.00      |
| 10.90     | 1.00      |
| 10.89     | 1.00      |
| 10.88     | 1.00      |
| 10.87     | 1.00      |
| 10.86     | 1.00      |
| 10.85     | 1.00      |
| 10.84     | 1.00      |
| 10.83     | 1.00      |
| 10.82     | 1.00      |
| 10.81     | 1.00      |
| 10.80     | 1.00      |
| 10.79     | 1.00      |
| 10.78     | 1.00      |
| 10.77     | 1.00      |
| 10.76     | 1.00      |
| 10.75     | 1.00      |
| 10.74     | 1.00      |
| 10.73     | 1.00      |
| 10.72     | 1.00      |
| 10.71     | 1.00      |
| 10.70     | 1.00      |
| 10.69     | 1.00      |
| 10.68     | 1.00      |
| 10.67     | 1.00      |
| 10.66     | 1.00      |
| 10.65     | 1.00      |
| 10.64     | 1.00      |
| 10.63     | 1.00      |
| 10.62     | 1.00      |
| 10.61     | 1.00      |
| 10.60     | 1.00      |
| 10.59     | 1.00      |
| 10.58     | 1.00      |
| 10.57     | 1.00      |
| 10.56     | 1.00      |
| 10.55     | 1.00      |
| 10.54     | 1.00      |
| 10.53     | 1.00      |
| 10.52     | 1.00      |
| 10.51     | 1.00      |
| 10.50     | 1.00      |
| 10.49     | 1.00      |
| 10.48     | 1.00      |
| 10.47     | 1.00      |
| 10.46     | 1.00      |
| 10.45     | 1.00      |
| 10.44     | 1.00      |
| 10.43     | 1.00      |
| 10.42     | 1.00      |
| 10.41     | 1.00      |
| 10.40     | 1.00      |
| 10.39     | 1.00      |
| 10.38     | 1.00      |
| 10.37     | 1.00      |
| 10.36     | 1.00      |
| 10.35     | 1.00      |
| 10.34     | 1.00      |

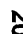

215 210 205 200 195 190 185 180 175 170 165 160 155 150 145 140 135 130 125 120 115 110 105 100 95 90 85 80 75 70 65 60 55 50 45 40 35 30 25 20 15 10 5 0 -5

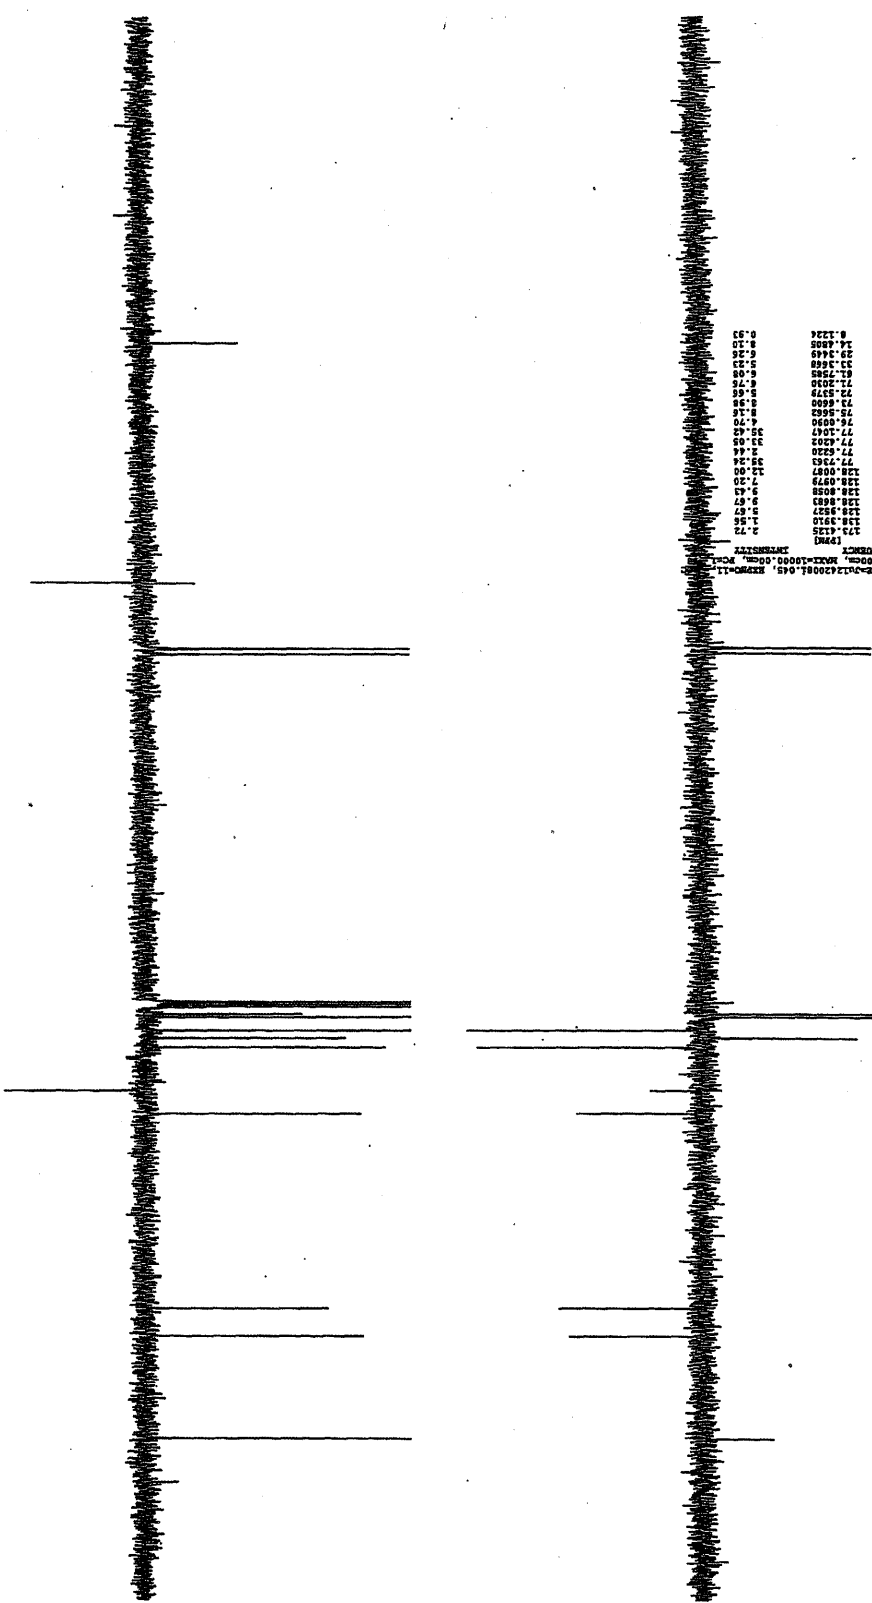

| DATE       | DESCRIPTION    | AMOUNT    | BALANCE      |
|------------|----------------|-----------|--------------|
| 12/31/2017 | ENDING BALANCE | 10,000.00 | 10,000.00    |
| 12/30/2017 | DEPOSIT        | 500.00    | 10,500.00    |
| 12/29/2017 | DEPOSIT        | 500.00    | 11,000.00    |
| 12/28/2017 | DEPOSIT        | 500.00    | 11,500.00    |
| 12/27/2017 | DEPOSIT        | 500.00    | 12,000.00    |
| 12/26/2017 | DEPOSIT        | 500.00    | 12,500.00    |
| 12/25/2017 | DEPOSIT        | 500.00    | 13,000.00    |
| 12/24/2017 | DEPOSIT        | 500.00    | 13,500.00    |
| 12/23/2017 | DEPOSIT        | 500.00    | 14,000.00    |
| 12/22/2017 | DEPOSIT        | 500.00    | 14,500.00    |
| 12/21/2017 | DEPOSIT        | 500.00    | 15,000.00    |
| 12/20/2017 | DEPOSIT        | 500.00    | 15,500.00    |
| 12/19/2017 | DEPOSIT        | 500.00    | 16,000.00    |
| 12/18/2017 | DEPOSIT        | 500.00    | 16,500.00    |
| 12/17/2017 | DEPOSIT        | 500.00    | 17,000.00    |
| 12/16/2017 | DEPOSIT        | 500.00    | 17,500.00    |
| 12/15/2017 | DEPOSIT        | 500.00    | 18,000.00    |
| 12/14/2017 | DEPOSIT        | 500.00    | 18,500.00    |
| 12/13/2017 | DEPOSIT        | 500.00    | 19,000.00    |
| 12/12/2017 | DEPOSIT        | 500.00    | 19,500.00    |
| 12/11/2017 | DEPOSIT        | 500.00    | 20,000.00    |
| 12/10/2017 | DEPOSIT        | 500.00    | 20,500.00    |
| 12/09/2017 | DEPOSIT        | 500.00    | 21,000.00    |
| 12/08/2017 | DEPOSIT        | 500.00    | 21,500.00    |
| 12/07/2017 | DEPOSIT        | 500.00    | 22,000.00    |
| 12/06/2017 | DEPOSIT        | 500.00    | 22,500.00    |
| 12/05/2017 | DEPOSIT        | 500.00    | 23,000.00    |
| 12/04/2017 | DEPOSIT        | 500.00    | 23,500.00    |
| 12/03/2017 | DEPOSIT        | 500.00    | 24,000.00    |
| 12/02/2017 | DEPOSIT        | 500.00    | 24,500.00    |
| 12/01/2017 | DEPOSIT        | 500.00    | 25,000.00    |
| 11/30/2017 | DEPOSIT        | 500.00    | 25,500.00    |
| 11/29/2017 | DEPOSIT        | 500.00    | 26,000.00    |
| 11/28/2017 | DEPOSIT        | 500.00    | 26,500.00    |
| 11/27/2017 | DEPOSIT        | 500.00    | 27,000.00    |
| 11/26/2017 | DEPOSIT        | 500.00    | 27,500.00    |
| 11/25/2017 | DEPOSIT        | 500.00    | 28,000.00    |
| 11/24/2017 | DEPOSIT        | 500.00    | 28,500.00    |
| 11/23/2017 | DEPOSIT        | 500.00    | 29,000.00    |
| 11/22/2017 | DEPOSIT        | 500.00    | 29,500.00    |
| 11/21/2017 | DEPOSIT        | 500.00    | 30,000.00    |
| 11/20/2017 | DEPOSIT        | 500.00    | 30,500.00    |
| 11/19/2017 | DEPOSIT        | 500.00    | 31,000.00    |
| 11/18/2017 | DEPOSIT        | 500.00    | 31,500.00    |
| 11/17/2017 | DEPOSIT        | 500.00    | 32,000.00    |
| 11/16/2017 | DEPOSIT        | 500.00    | 32,500.00    |
| 11/15/2017 | DEPOSIT        | 500.00    | 33,000.00    |
| 11/14/2017 | DEPOSIT        | 500.00    | 33,500.00    |
| 11/13/2017 | DEPOSIT        | 500.00    | 34,000.00    |
| 11/12/2017 | DEPOSIT        | 500.00    | 34,500.00    |
| 11/11/2017 | DEPOSIT        | 500.00    | 35,000.00    |
| 11/10/2017 | DEPOSIT        | 500.00    | 35,500.00    |
| 11/09/2017 | DEPOSIT        | 500.00    | 36,000.00    |
| 11/08/2017 | DEPOSIT        | 500.00    | 36,500.00    |
| 11/07/2017 | DEPOSIT        | 500.00    | 37,000.00    |
| 11/06/2017 | DEPOSIT        | 500.00    | 37,500.00    |
| 11/05/2017 | DEPOSIT        | 500.00    | 38,000.00    |
| 11/04/2017 | DEPOSIT        | 500.00    | 38,500.00    |
| 11/03/2017 | DEPOSIT        | 500.00    | 39,000.00    |
| 11/02/2017 | DEPOSIT        | 500.00    | 39,500.00    |
| 11/01/2017 | DEPOSIT        | 500.00    | 40,000.00    |
| 10/31/2017 | DEPOSIT        | 500.00    | 40,500.00    |
| 10/30/2017 | DEPOSIT        | 500.00    | 41,000.00    |
| 10/29/2017 | DEPOSIT        | 500.00    | 41,500.00    |
| 10/28/2017 | DEPOSIT        | 500.00    | 42,000.00    |
| 10/27/2017 | DEPOSIT        | 500.00    | 42,500.00    |
| 10/26/2017 | DEPOSIT        | 500.00    | 43,000.00    |
| 10/25/2017 | DEPOSIT        | 500.00    | 43,500.00    |
| 10/24/2017 | DEPOSIT        | 500.00    | 44,000.00    |
| 10/23/2017 | DEPOSIT        | 500.00    | 44,500.00    |
| 10/22/2017 | DEPOSIT        | 500.00    | 45,000.00    |
| 10/21/2017 | DEPOSIT        | 500.00    | 45,500.00    |
| 10/20/2017 | DEPOSIT        | 500.00    | 46,000.00    |
| 10/19/2017 | DEPOSIT        | 500.00    | 46,500.00    |
| 10/18/2017 | DEPOSIT        | 500.00    | 47,000.00    |
| 10/17/2017 | DEPOSIT        | 500.00    | 47,500.00    |
| 10/16/2017 | DEPOSIT        | 500.00    | 48,000.00    |
| 10/15/2017 | DEPOSIT        | 500.00    | 48,500.00    |
| 10/14/2017 | DEPOSIT        | 500.00    | 49,000.00    |
| 10/13/2017 | DEPOSIT        | 500.00    | 49,500.00    |
| 10/12/2017 | DEPOSIT        | 500.00    | 50,000.00    |
| 10/11/2017 | DEPOSIT        | 500.00    | 50,500.00    |
| 10/10/2017 | DEPOSIT        | 500.00    | 51,000.00    |
| 10/09/2017 | DEPOSIT        | 500.00    | 51,500.00    |
| 10/08/2017 | DEPOSIT        | 500.00    | 52,000.00    |
| 10/07/2017 | DEPOSIT        | 500.00    | 52,500.00    |
| 10/06/2017 | DEPOSIT        | 500.00    | 53,000.00    |
| 10/05/2017 | DEPOSIT        | 500.00    | 53,500.00    |
| 10/04/2017 | DEPOSIT        | 500.00    | 54,000.00    |
| 10/03/2017 | DEPOSIT        | 500.00    | 54,500.00    |
| 10/02/2017 | DEPOSIT        | 500.00    | 55,000.00    |
| 10/01/2017 | DEPOSIT        | 500.00    | 55,500.00    |
| 09/30/2017 | DEPOSIT        | 500.00    | 56,000.00    |
| 09/29/2017 | DEPOSIT        | 500.00    | 56,500.00    |
| 09/28/2017 | DEPOSIT        | 500.00    | 57,000.00    |
| 09/27/2017 | DEPOSIT        | 500.00    | 57,500.00    |
| 09/26/2017 | DEPOSIT        | 500.00    | 58,000.00    |
| 09/25/2017 | DEPOSIT        | 500.00    | 58,500.00    |
| 09/24/2017 | DEPOSIT        | 500.00    | 59,000.00    |
| 09/23/2017 | DEPOSIT        | 500.00    | 59,500.00    |
| 09/22/2017 | DEPOSIT        | 500.00    | 60,000.00    |
| 09/21/2017 | DEPOSIT        | 500.00    | 60,500.00    |
| 09/20/2017 | DEPOSIT        | 500.00    | 61,000.00    |
| 09/19/2017 | DEPOSIT        | 500.00    | 61,500.00    |
| 09/18/2017 | DEPOSIT        | 500.00    | 62,000.00    |
| 09/17/2017 | DEPOSIT        | 500.00    | 62,500.00    |
| 09/16/2017 | DEPOSIT        | 500.00    | 63,000.00    |
| 09/15/2017 | DEPOSIT        | 500.00    | 63,500.00    |
| 09/14/2017 | DEPOSIT        | 500.00    | 64,000.00    |
| 09/13/2017 | DEPOSIT        | 500.00    | 64,500.00    |
| 09/12/2017 | DEPOSIT        | 500.00    | 65,000.00    |
| 09/11/2017 | DEPOSIT        | 500.00    | 65,500.00    |
| 09/10/2017 | DEPOSIT        | 500.00    | 66,000.00    |
| 09/09/2017 | DEPOSIT        | 500.00    | 66,500.00    |
| 09/08/2017 | DEPOSIT        | 500.00    | 67,000.00    |
| 09/07/2017 | DEPOSIT        | 500.00    | 67,500.00    |
| 09/06/2017 | DEPOSIT        | 500.00    | 68,000.00    |
| 09/05/2017 | DEPOSIT        | 500.00    | 68,500.00    |
| 09/04/2017 | DEPOSIT        | 500.00    | 69,000.00    |
| 09/03/2017 | DEPOSIT        | 500.00    | 69,500.00    |
| 09/02/2017 | DEPOSIT        | 500.00    | 70,000.00    |
| 09/01/2017 | DEPOSIT        | 500.00    | 70,500.00    |
| 08/31/2017 | DEPOSIT        | 500.00    | 71,000.00    |
| 08/30/2017 | DEPOSIT        | 500.00    | 71,500.00    |
| 08/29/2017 | DEPOSIT        | 500.00    | 72,000.00    |
| 08/28/2017 | DEPOSIT        | 500.00    | 72,500.00    |
| 08/27/2017 | DEPOSIT        | 500.00    | 73,000.00    |
| 08/26/2017 | DEPOSIT        | 500.00    | 73,500.00    |
| 08/25/2017 | DEPOSIT        | 500.00    | 74,000.00    |
| 08/24/2017 | DEPOSIT        | 500.00    | 74,500.00    |
| 08/23/2017 | DEPOSIT        | 500.00    | 75,000.00    |
| 08/22/2017 | DEPOSIT        | 500.00    | 75,500.00    |
| 08/21/2017 | DEPOSIT        | 500.00    | 76,000.00    |
| 08/20/2017 | DEPOSIT        | 500.00    | 76,500.00    |
| 08/19/2017 | DEPOSIT        | 500.00    | 77,000.00    |
| 08/18/2017 | DEPOSIT        | 500.00    | 77,500.00    |
| 08/17/2017 | DEPOSIT        | 500.00    | 78,000.00    |
| 08/16/2017 | DEPOSIT        | 500.00    | 78,500.00    |
| 08/15/2017 | DEPOSIT        | 500.00    | 79,000.00    |
| 08/14/2017 | DEPOSIT        | 500.00    | 79,500.00    |
| 08/13/2017 | DEPOSIT        | 500.00    | 80,000.00    |
| 08/12/2017 | DEPOSIT        | 500.00    | 80,500.00    |
| 08/11/2017 | DEPOSIT        | 500.00    | 81,000.00    |
| 08/10/2017 | DEPOSIT        | 500.00    | 81,500.00    |
| 08/09/2017 | DEPOSIT        | 500.00    | 82,000.00    |
| 08/08/2017 | DEPOSIT        | 500.00    | 82,500.00    |
| 08/07/2017 | DEPOSIT        | 500.00    | 83,000.00    |
| 08/06/2017 | DEPOSIT        | 500.00    | 83,500.00    |
| 08/05/2017 | DEPOSIT        | 500.00    | 84,000.00    |
| 08/04/2017 | DEPOSIT        | 500.00    | 84,500.00    |
| 08/03/2017 | DEPOSIT        | 500.00    | 85,000.00    |
| 08/02/2017 | DEPOSIT        | 500.00    | 85,500.00    |
| 08/01/2017 | DEPOSIT        | 500.00    | 86,000.00    |
| 07/31/2017 | DEPOSIT        | 500.00    | 86,500.00    |
| 07/30/2017 | DEPOSIT        | 500.00    | 87,000.00    |
| 07/29/2017 | DEPOSIT        | 500.00    | 87,500.00    |
| 07/28/2017 | DEPOSIT        | 500.00    | 88,000.00    |
| 07/27/2017 | DEPOSIT        | 500.00    | 88,500.00    |
| 07/26/2017 | DEPOSIT        | 500.00    | 89,000.00    |
| 07/25/2017 | DEPOSIT        | 500.00    | 89,500.00    |
| 07/24/2017 | DEPOSIT        | 500.00    | 90,000.00    |
| 07/23/2017 | DEPOSIT        | 500.00    | 90,500.00    |
| 07/22/2017 | DEPOSIT        | 500.00    | 91,000.00    |
| 07/21/2017 | DEPOSIT        | 500.00    | 91,500.00    |
| 07/20/2017 | DEPOSIT        | 500.00    | 92,000.00    |
| 07/19/2017 | DEPOSIT        | 500.00    | 92,500.00    |
| 07/18/2017 | DEPOSIT        | 500.00    | 93,000.00    |
| 07/17/2017 | DEPOSIT        | 500.00    | 93,500.00    |
| 07/16/2017 | DEPOSIT        | 500.00    | 94,000.00    |
| 07/15/2017 | DEPOSIT        | 500.00    | 94,500.00    |
| 07/14/2017 | DEPOSIT        | 500.00    | 95,000.00    |
| 07/13/2017 | DEPOSIT        | 500.00    | 95,500.00    |
| 07/12/2017 | DEPOSIT        | 500.00    | 96,000.00    |
| 07/11/2017 | DEPOSIT        | 500.00    | 96,500.00    |
| 07/10/2017 | DEPOSIT        | 500.00    | 97,000.00    |
| 07/09/2017 | DEPOSIT        | 500.00    | 97,500.00    |
| 07/08/2017 | DEPOSIT        | 500.00    | 98,000.00    |
| 07/07/2017 | DEPOSIT        | 500.00    | 98,500.00    |
| 07/06/2017 | DEPOSIT        | 500.00    | 99,000.00    |
| 07/05/2017 | DEPOSIT        | 500.00    | 99,500.00    |
| 07/04/2017 | DEPOSIT        | 500.00    | 100,000.00   |
| 07/03/2017 | DEPOSIT        | 500.00    | 100,500.00   |
| 07/02/2017 | DEPOSIT        | 500.00    | 101,000.00   |
| 07/01/2017 | DEPOSIT        | 500.00    | 101,500.00   |
| 06/30/2017 | DEPOSIT        | 500.00    | 102,000.00   |
| 06/29/2017 | DEPOSIT        | 500.00    | 102,500.00   |
| 06/28/2017 | DEPOSIT        | 500.00    | 103,000.00   |
| 06/27/2017 | DEPOSIT        | 500.00    | 103,500.00   |
| 06/26/2017 | DEPOSIT        | 500.00    | 104,000.00   |
| 06/25/2017 | DEPOSIT        | 500.00    | 104,500.00   |
| 06/24/2017 | DEPOSIT        | 500.00    | 105,000.00   |
| 06/23/2017 | DEPOSIT        | 500.00    | 105,500.00   |
| 06/22/2017 | DEPOSIT        | 500.00    | 106,000.00   |
| 06/21/2017 | DEPOSIT        | 500.00    | 106,500.00   |
| 06/20/2017 | DEPOSIT        | 500.00    | 107,000.00   |
| 06/19/2017 | DEPOSIT        | 500.00    | 107,500.00   |
| 06/18/2017 | DEPOSIT        | 500.00    | 108,000.00   |
| 06/17/2017 | DEPOSIT        | 500.00    | 108,500.00   |
| 06/16/2017 | DEPOSIT        | 500.00    | 109,000.00   |
| 06/15/2017 | DEPOSIT        | 500.00    | 109,500.00   |
| 06/14/2017 | DEPOSIT        | 500.00    | 110,000.00   |
| 06/13/2017 | DEPOSIT        | 500.00    | 110,500.00   |
| 06/12/2017 | DEPOSIT        | 500.00    | 111,000.00   |
| 06/11/2017 | DEPOSIT        | 500.00    | 111,500.00   |
| 06/10/2017 | DEPOSIT        | 500.00    | 112,000.00   |
| 06/09/2017 | DEPOSIT        | 500.00    | 112,500.00   |
| 06/08/2017 | DEPOSIT        | 500.00    | 113,000.00   |
| 06/07/2017 | DEPOSIT        | 500.00    | 113,500.00   |
| 06/06/2017 | DEPOSIT        | 500.00    | 114,000.00   |
| 06/05/2017 | DEPOSIT        | 500.00    | 114,500.00   |
| 06/04/2017 | DEPOSIT        | 500.00    | 115,000.00   |
| 06/03/2017 | DEPOSIT        | 500.00    | 115,500.00   |
| 06/02/2017 | DEPOSIT        | 500.00    | 116,000.00   |
| 06/01/2017 | DEPOSIT        | 500.00    | 116,500.00   |
| 05/31/2017 | DEPOSIT        | 500.00    | 117,000.00   |
| 05/30/2017 | DEPOSIT        | 500.00    | 117,500.00   |
| 05/29/2017 | DEPOSIT        | 500.00    | 118,000.00   |
| 05/28/2017 | DEPOSIT        | 500.00    | 118,500.00   |
| 05/27/2017 | DEPOSIT        | 500.00    | 119,000.00   |
| 05/26/2017 | DEPOSIT        | 500.00    | 119,500.00   |
| 05/25/2017 | DEPOSIT        | 500.00    | 120,000.00   |
| 05/24/2017 | DEPOSIT        | 500.00    | 120,500.00   |
| 05/23/2017 | DEPOSIT        | 500.00    | 121,000.00   |
| 05/22/2017 | DEPOSIT        | 500.00    | 121,500.00   |
| 05/21/2017 | DEPOSIT        | 500.00    | 122,000.00   |
| 05/20/2017 | DEPOSIT        | 500.00    | 122,500.00   |
| 05/19/2017 | DEPOSIT        | 500.00    | 123,000.00   |
| 05/18/2017 | DEPOSIT        | 500.00    | 123,500.00   |
| 05/17/2017 | DEPOSIT        | 500.00    | 124,000.00   |
| 05/16/2017 | DEPOSIT        | 500.00    | 124,500.00   |
| 05/15/2017 | DEPOSIT        | 500.00    | 125,000.00   |
| 05/14/2017 | DEPOSIT        | 500.00    | 125,500.00   |
| 05/13/2017 | DEPOSIT        | 500.00    | 126,000.00   |
| 05/12/2017 | DEPOSIT        | 500.00    | 126,500.00   |
| 05/11/2017 | DEPOSIT        | 500.00    | 127,000.00   |
| 05/10/2017 | DEPOSIT        | 500.00    | 127,500.00   |
| 05/09/2017 | DEPOSIT        | 500.00    | 128,000.00   |
| 05/08/2017 | DEPOSIT        | 500.00    | 128,500.00   |
| 05/07/2017 | DEPOSIT        | 500.00    | 129,000.00   |
| 05/06/2017 | DEPOSIT        | 500.00    | 129,500.00   |
| 05/05/2017 | DEPOSIT        | 500.00    | 130,000.00</ |

DU=00/c/copied, USER=chm1sc, NAME=J12420087.045, HX=NO=11,  
PI=229.1745pm, FZ=-9.1745pm, HI=0.00cm, MAXI=10000.00cm, PC=1,  
ADDRESS PROXIMITY INTENSITY

[illegible]

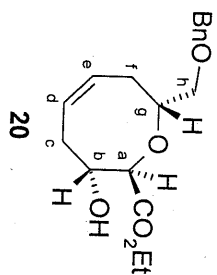

MR97540 00  
 Jim Li  
 NTRK PR99137-114  
 LR 206557

29 JUL 2008

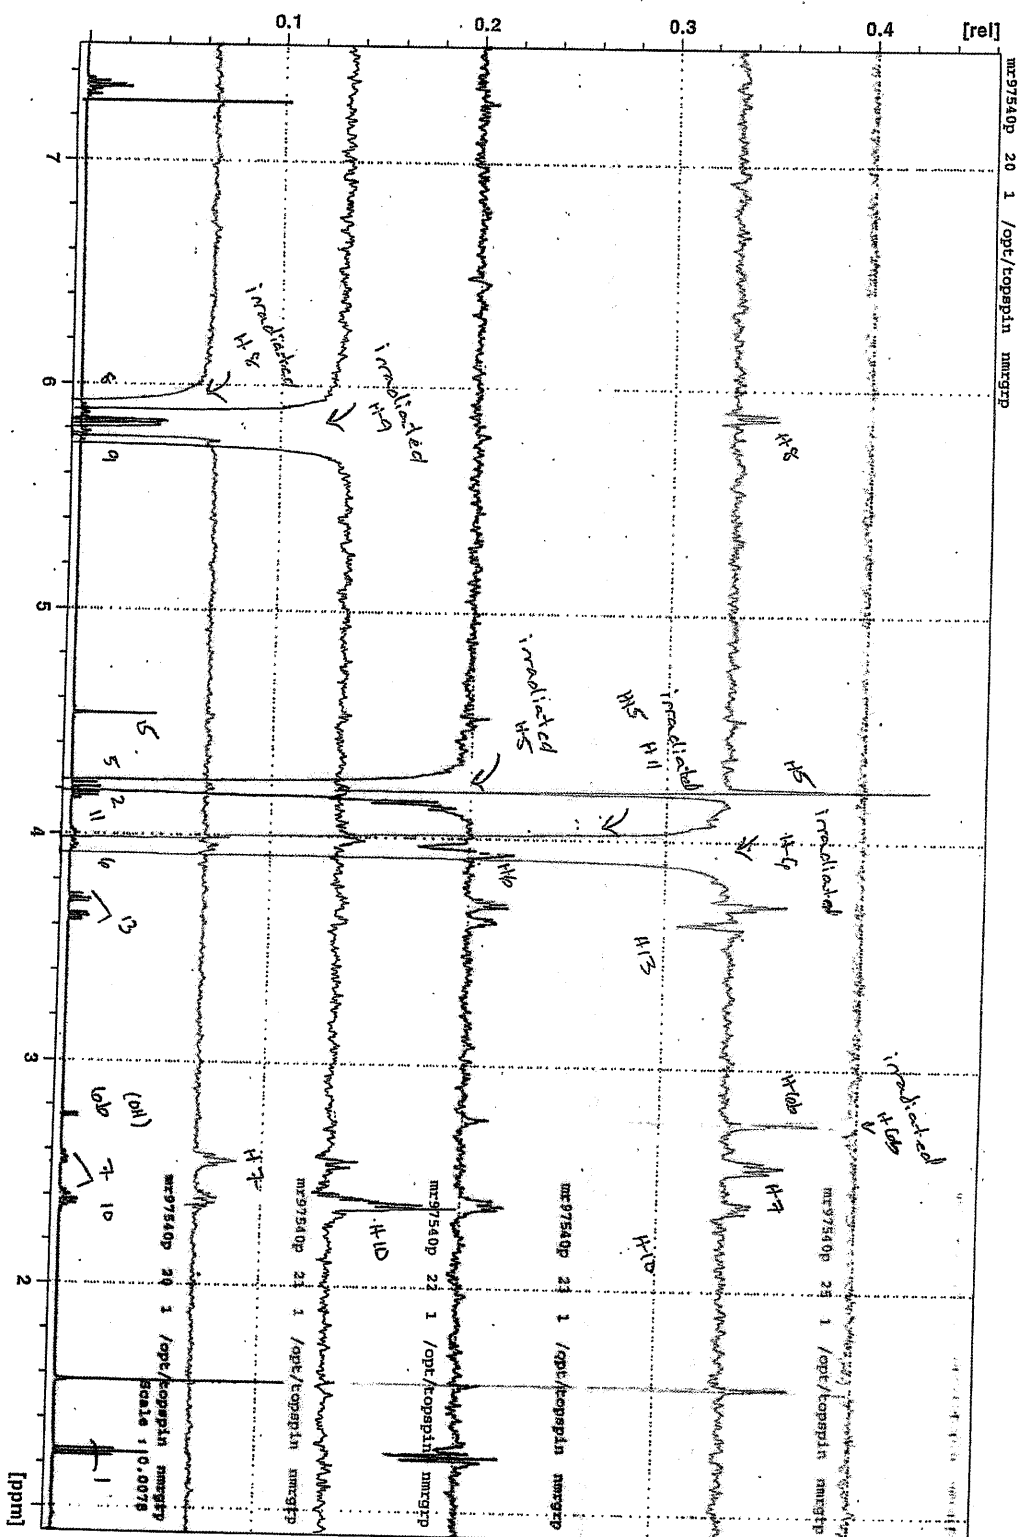

Supplement: Supplementary file 1 [file 4392322]
